# Supplementary figures and images for: The SAMPL9 host–guest blind challenge: an overview of binding free energy predictive accuracy (part 1 of 2)
Source: Royal Society of Chemistry journal article supplement (doi:10.1039/d3cp05111k), 2024-01-01

# APR/GAFF2/TIP3P/MD-US/MBAR - CD (21)

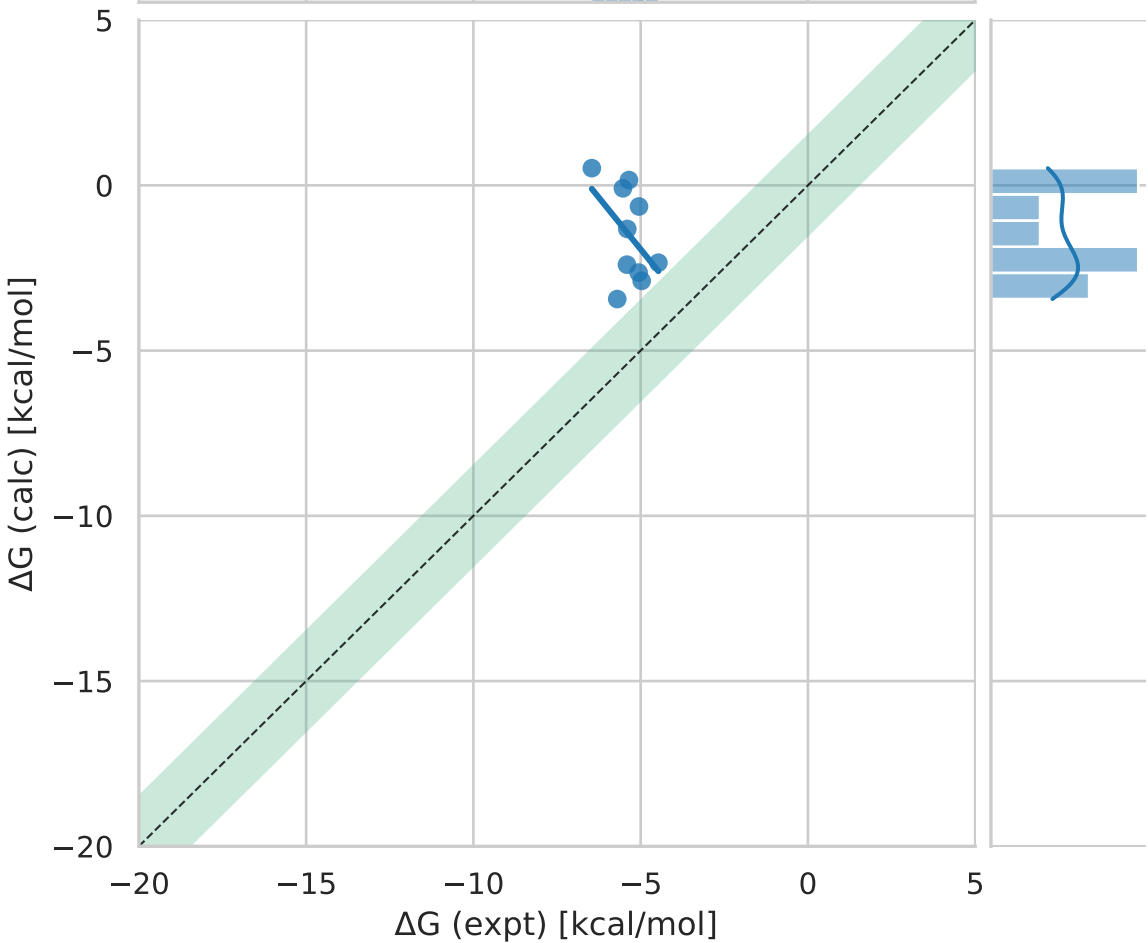

Supplement: d3cp05111k1.zip [file d3cp05111k1.zip]

# APR/GAFF2/TIP3P/MD-US/MBAR - WP6 (18)

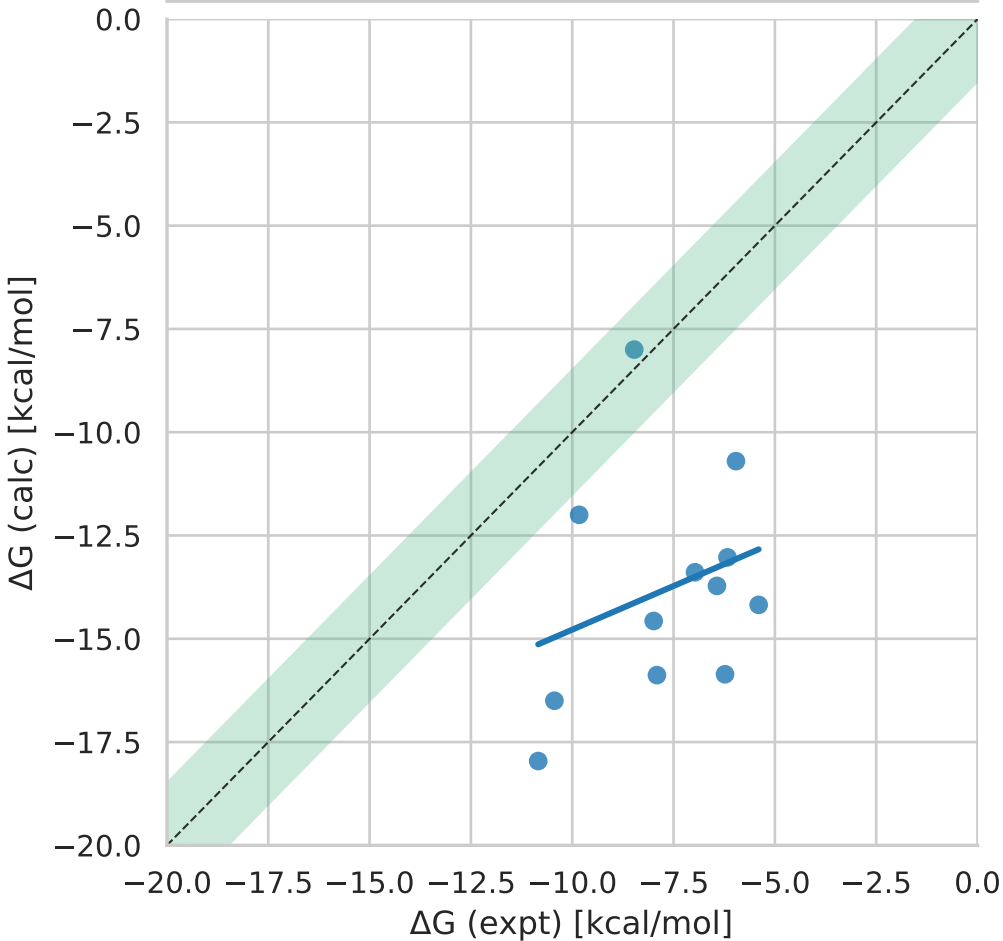

Supplement: d3cp05111k1.zip [file d3cp05111k1.zip]

APR/OFF1.2.0/TIP3P/MD-US/MBAR - bCD (22)

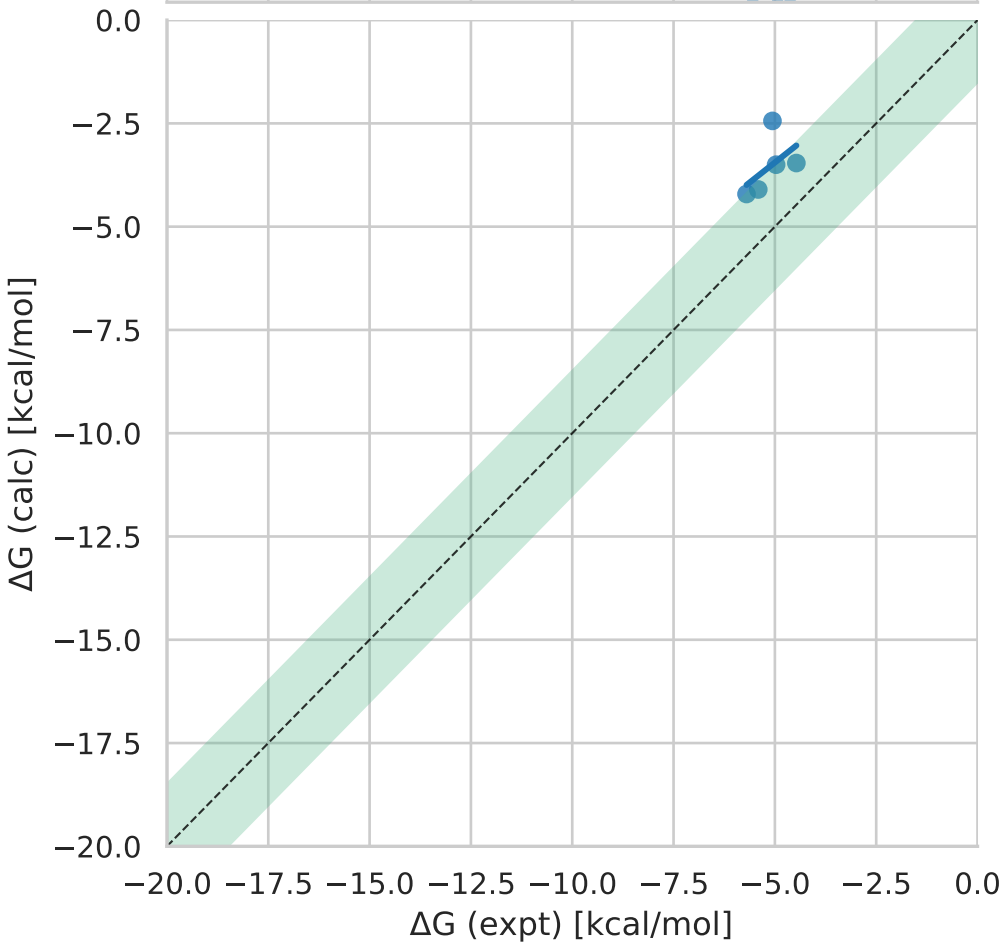

Supplement: d3cp05111k1.zip [file d3cp05111k1.zip]

DD/GROMOS-53A6\_glyc/SPC/MD - HbCD (11)

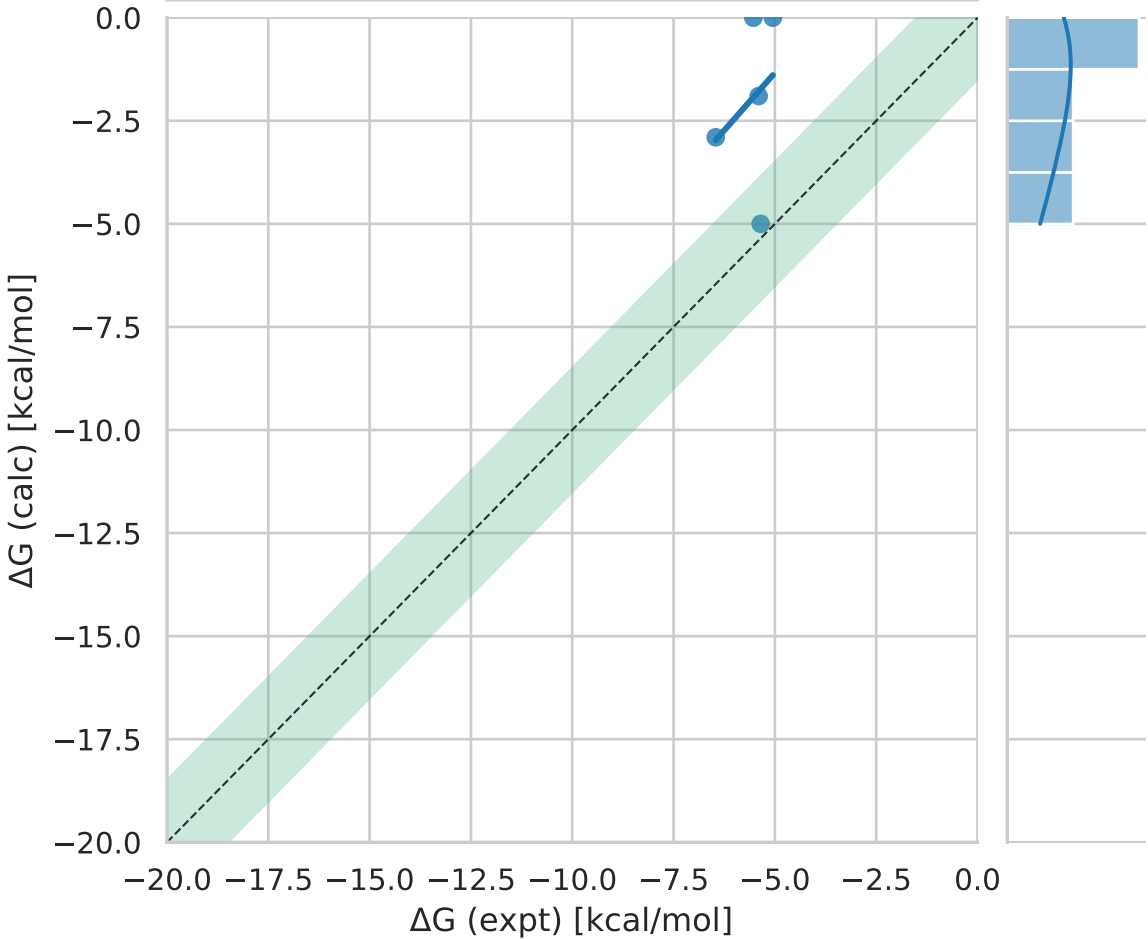

Supplement: d3cp05111k1.zip [file d3cp05111k1.zip]

# PMF/GAFF-RESP/TIP4PEW/SMD - HbCD (10)

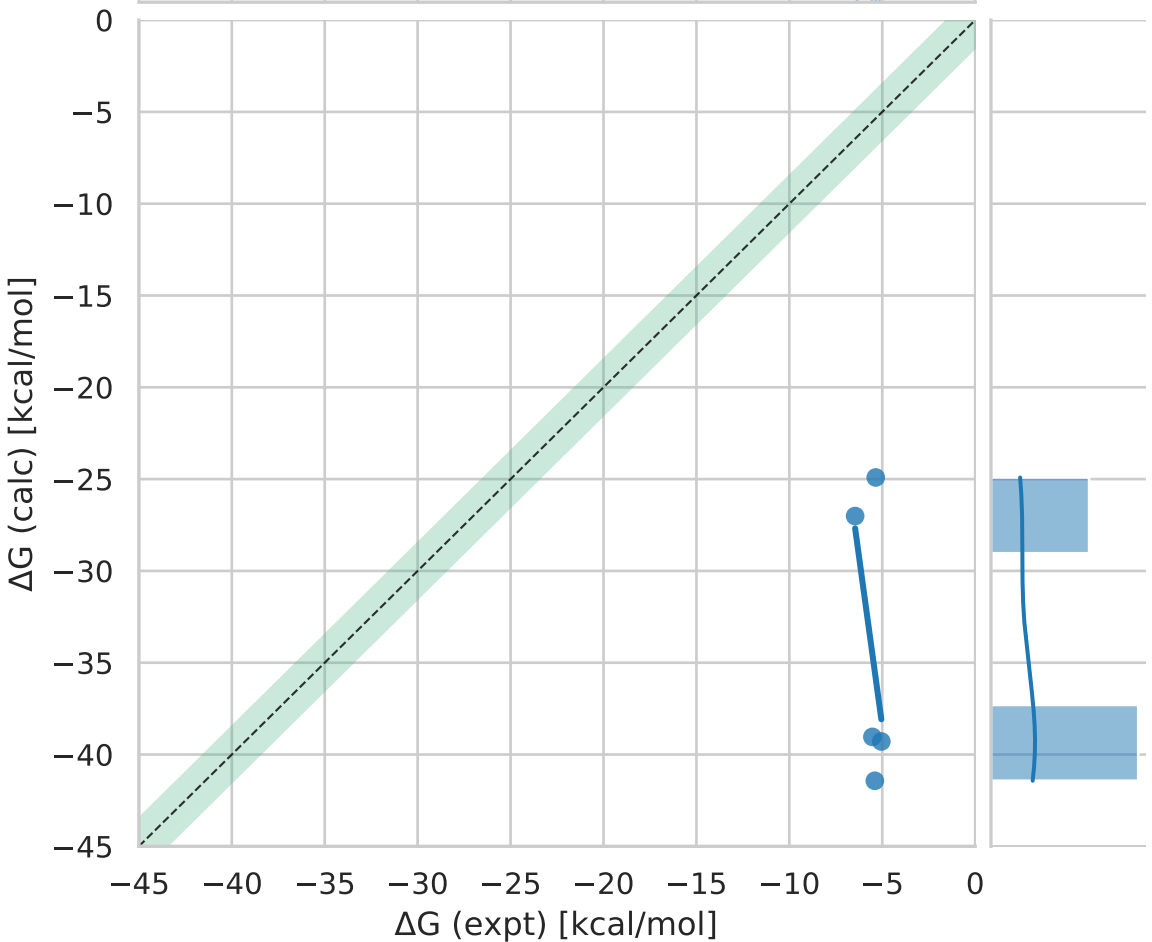

Supplement: d3cp05111k1.zip [file d3cp05111k1.zip]

DDM/AMOEBA/BAR - WP6 (7)

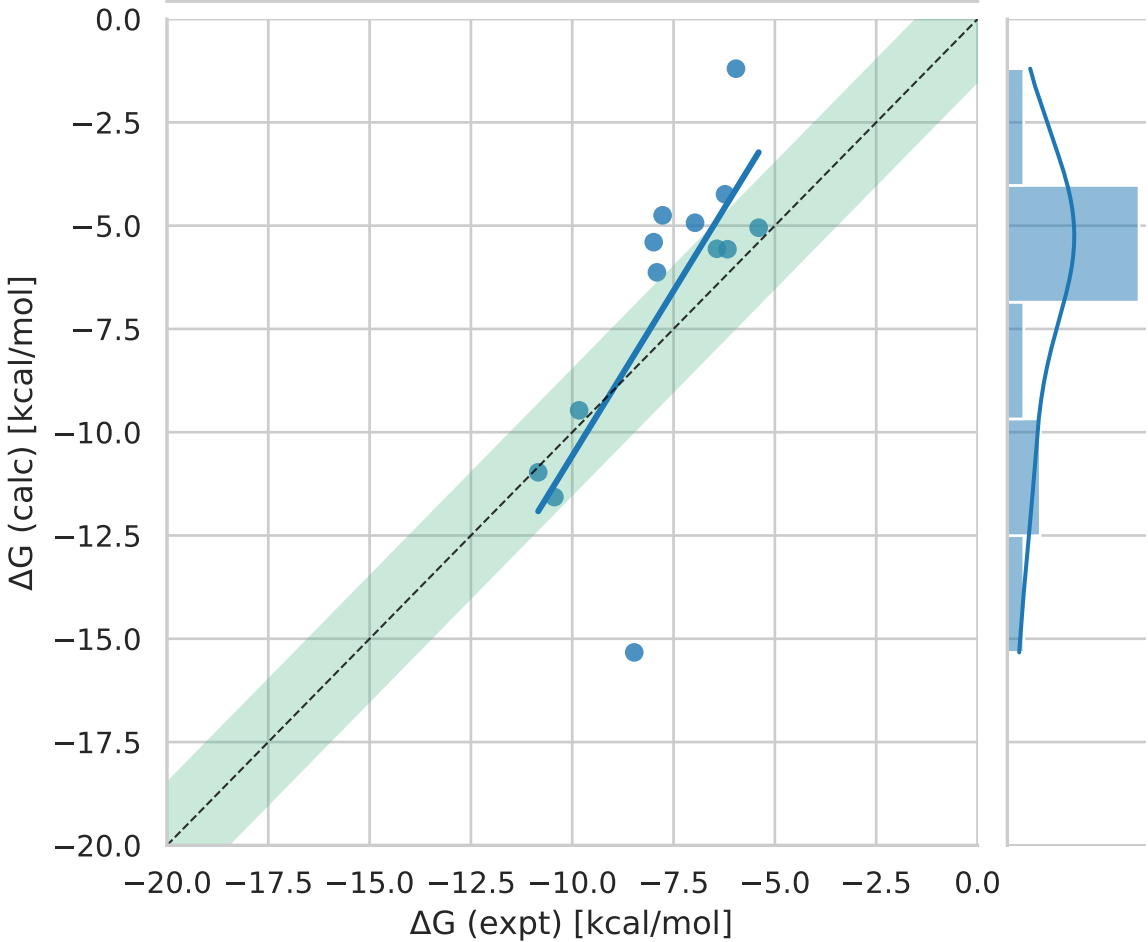

Supplement: d3cp05111k1.zip [file d3cp05111k1.zip]

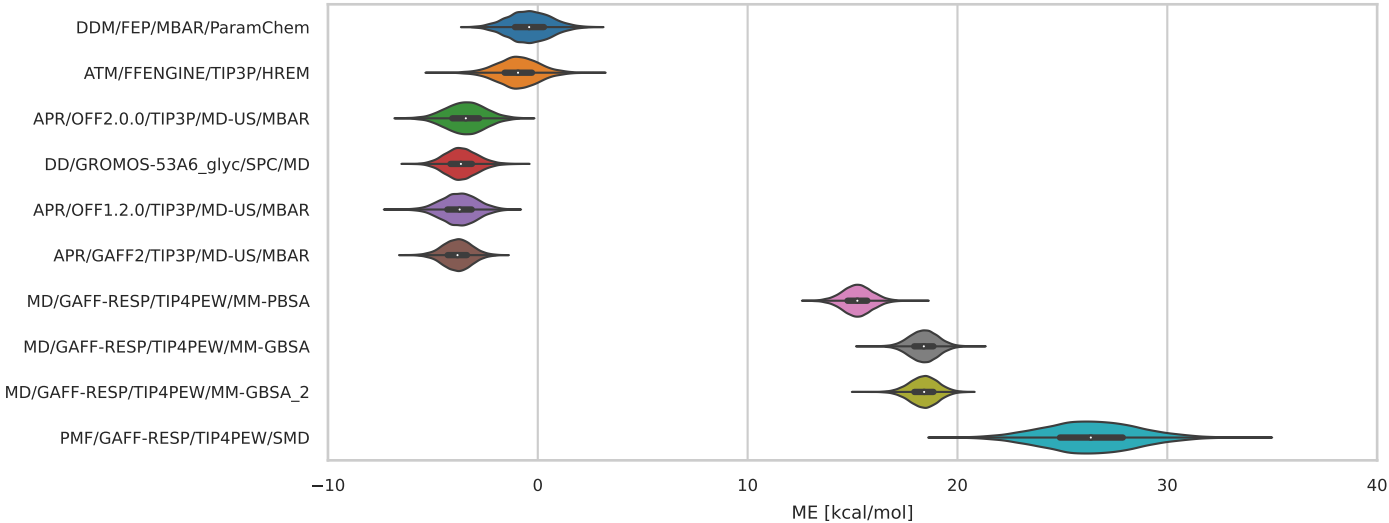

Supplement: d3cp05111k1.zip [file d3cp05111k1.zip]

EE/Openff-2.0/TIP3P/MD-EE/WL\_RL.02\_L.01 - WP6 (4)

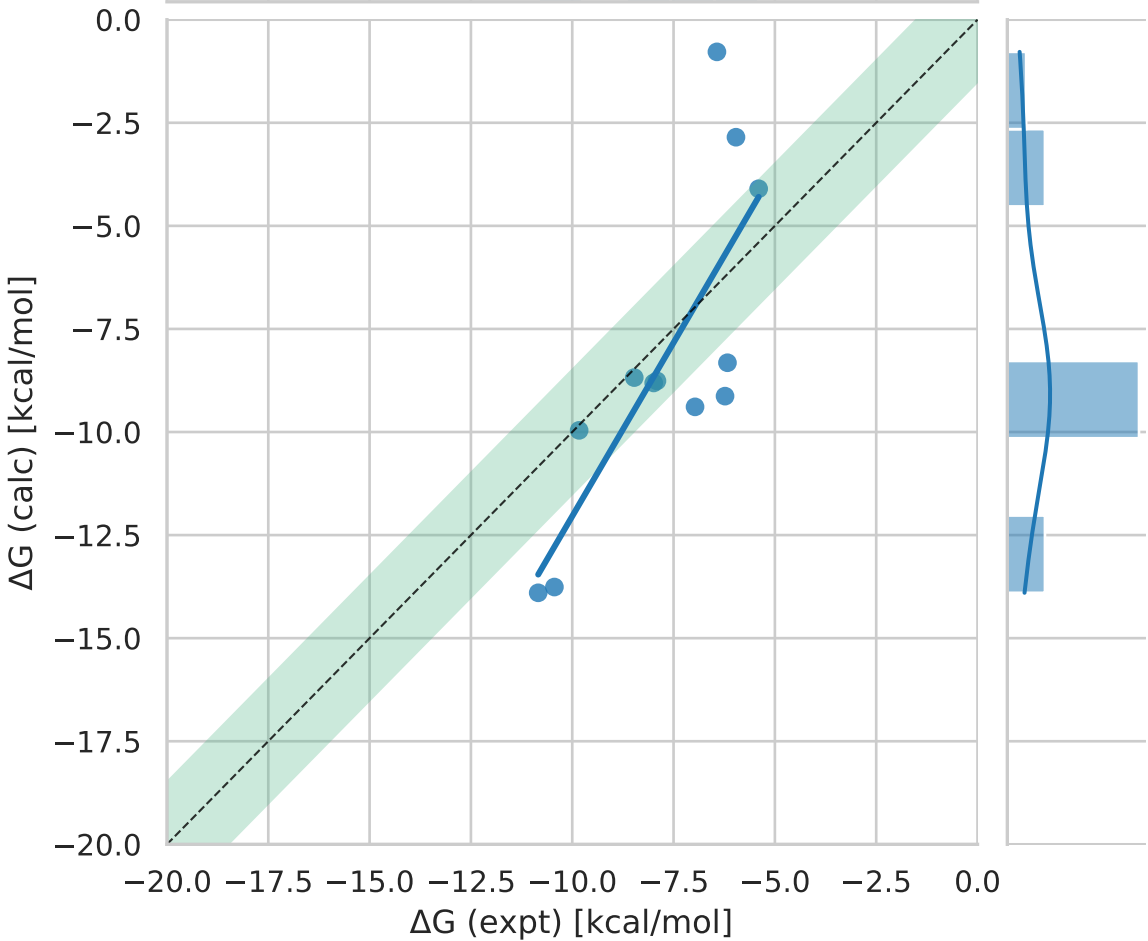

Supplement: d3cp05111k1.zip [file d3cp05111k1.zip]

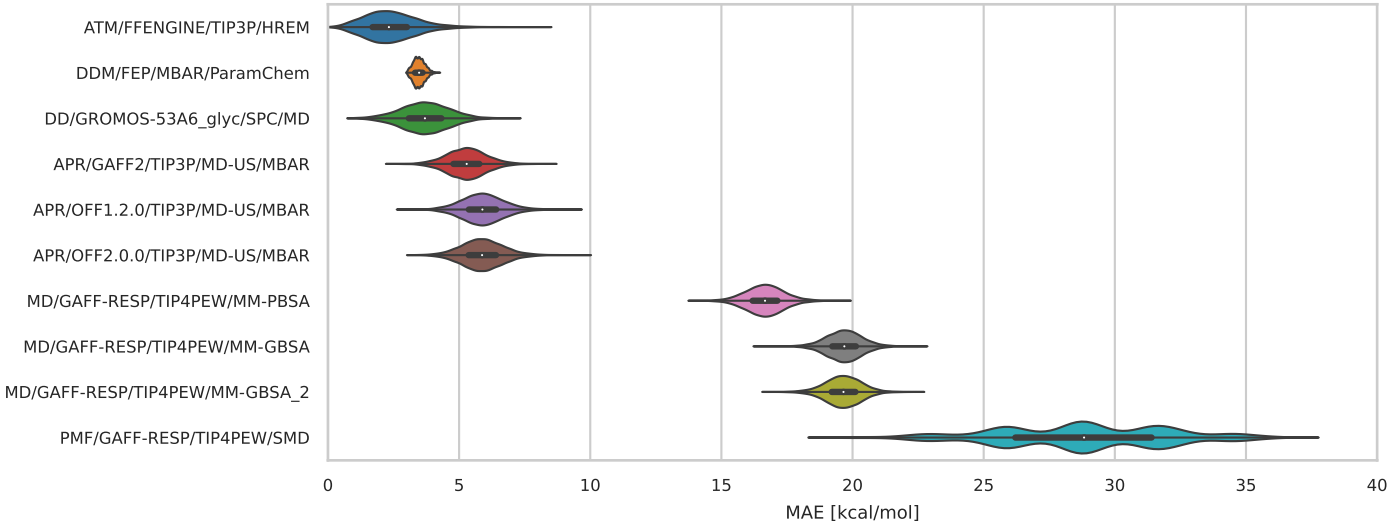

Supplement: d3cp05111k1.zip [file d3cp05111k1.zip]

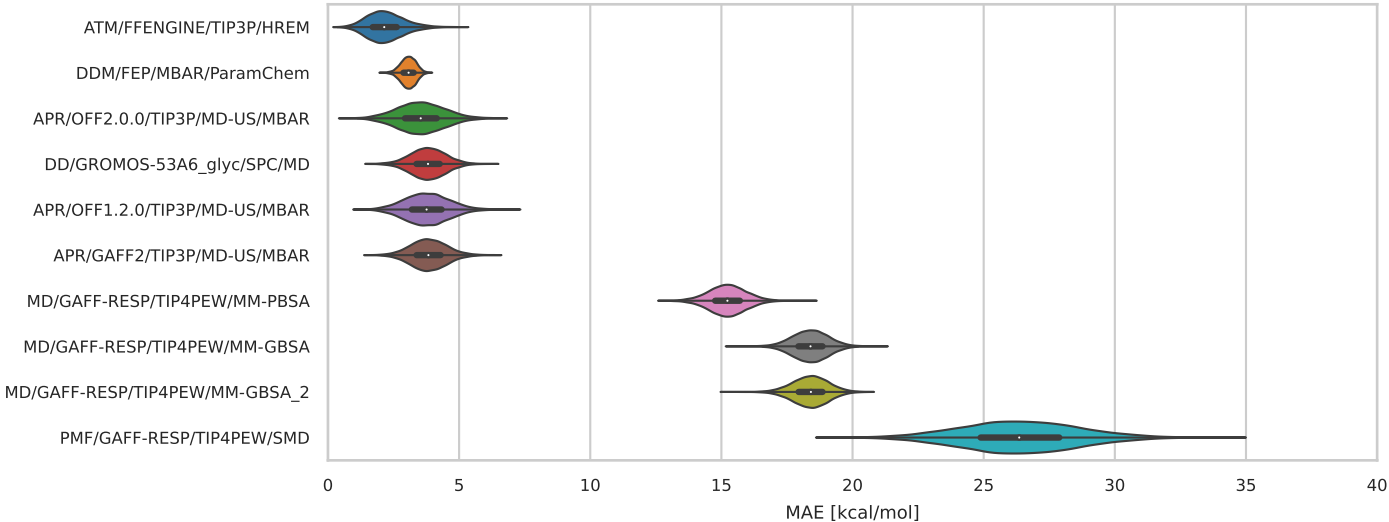

Supplement: d3cp05111k1.zip [file d3cp05111k1.zip]

APR/OFF2.0.0/TIP3P/MD-US/MBAR - WP6 (20)

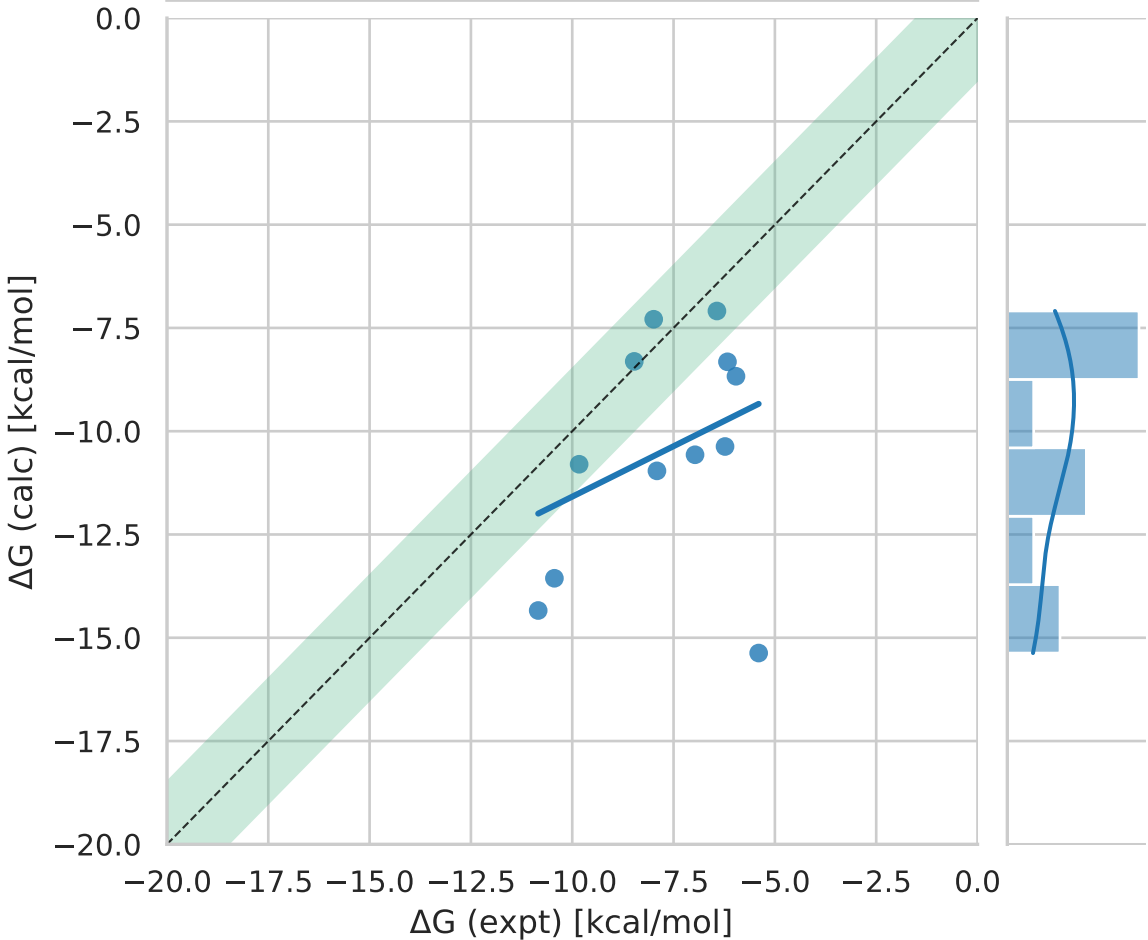

Supplement: d3cp05111k1.zip [file d3cp05111k1.zip]

MD/GAFF-RESP/TIP4PEW/MM-GBSA - bCD (12)

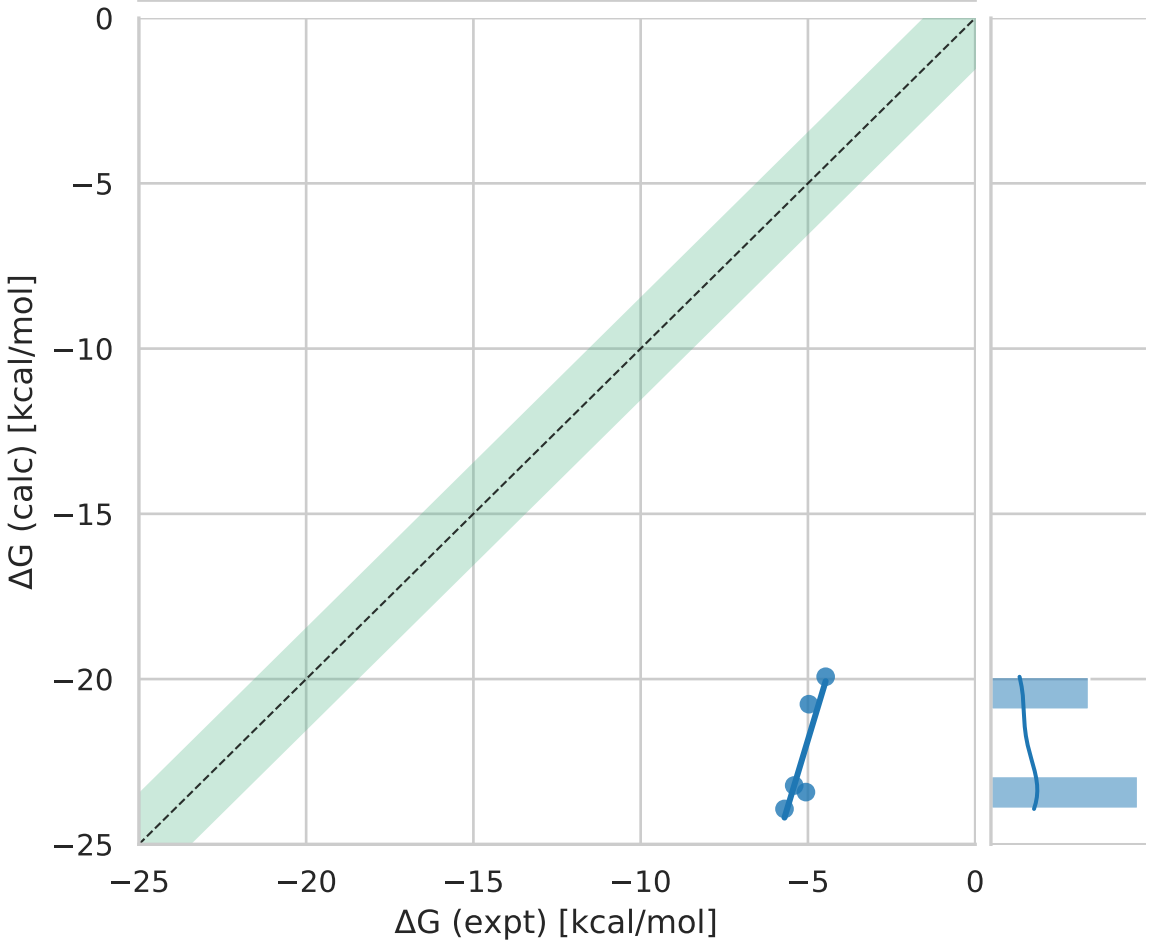

Supplement: d3cp05111k1.zip [file d3cp05111k1.zip]

DD/GROMOS-53A6 glyc/SPC/MD - bCD (11

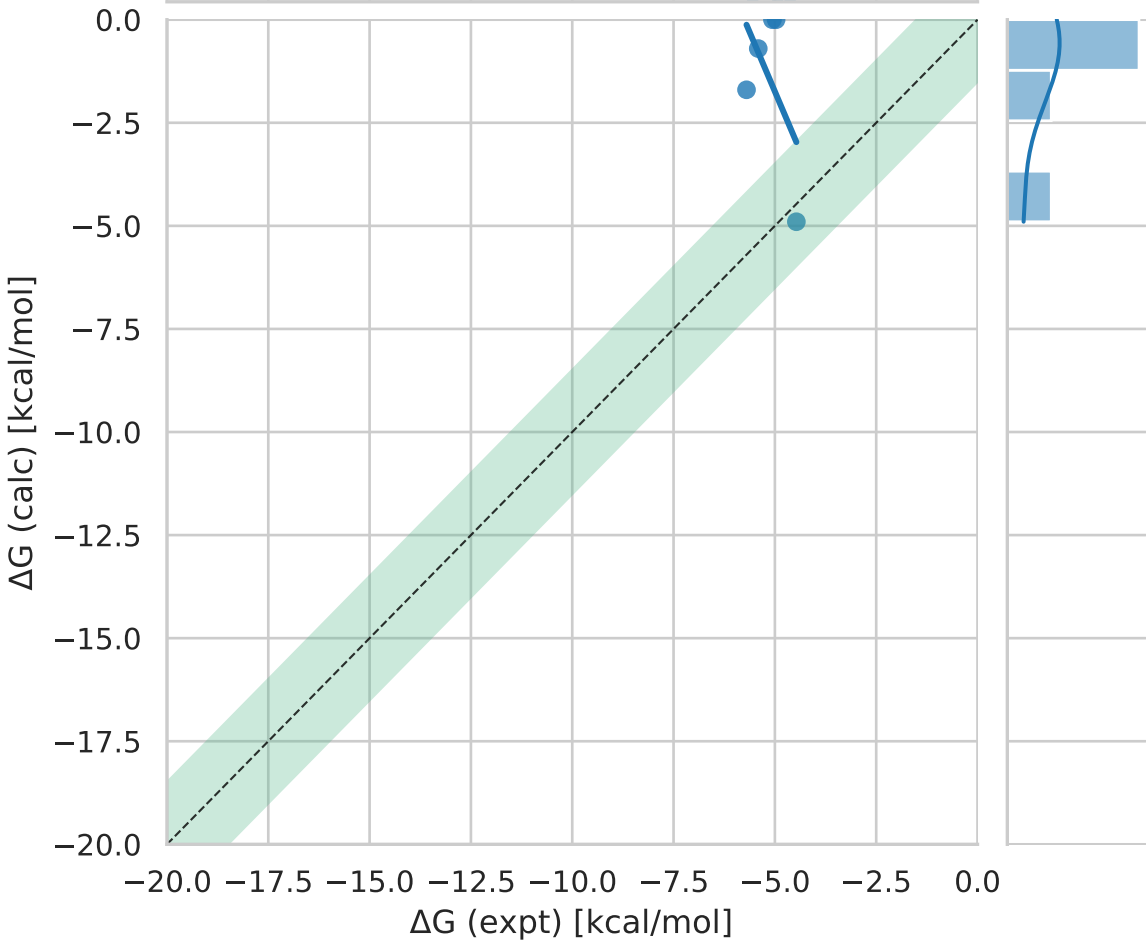

Supplement: d3cp05111k1.zip [file d3cp05111k1.zip]

DDM/AMOEBA/BAR - WP6 (7)

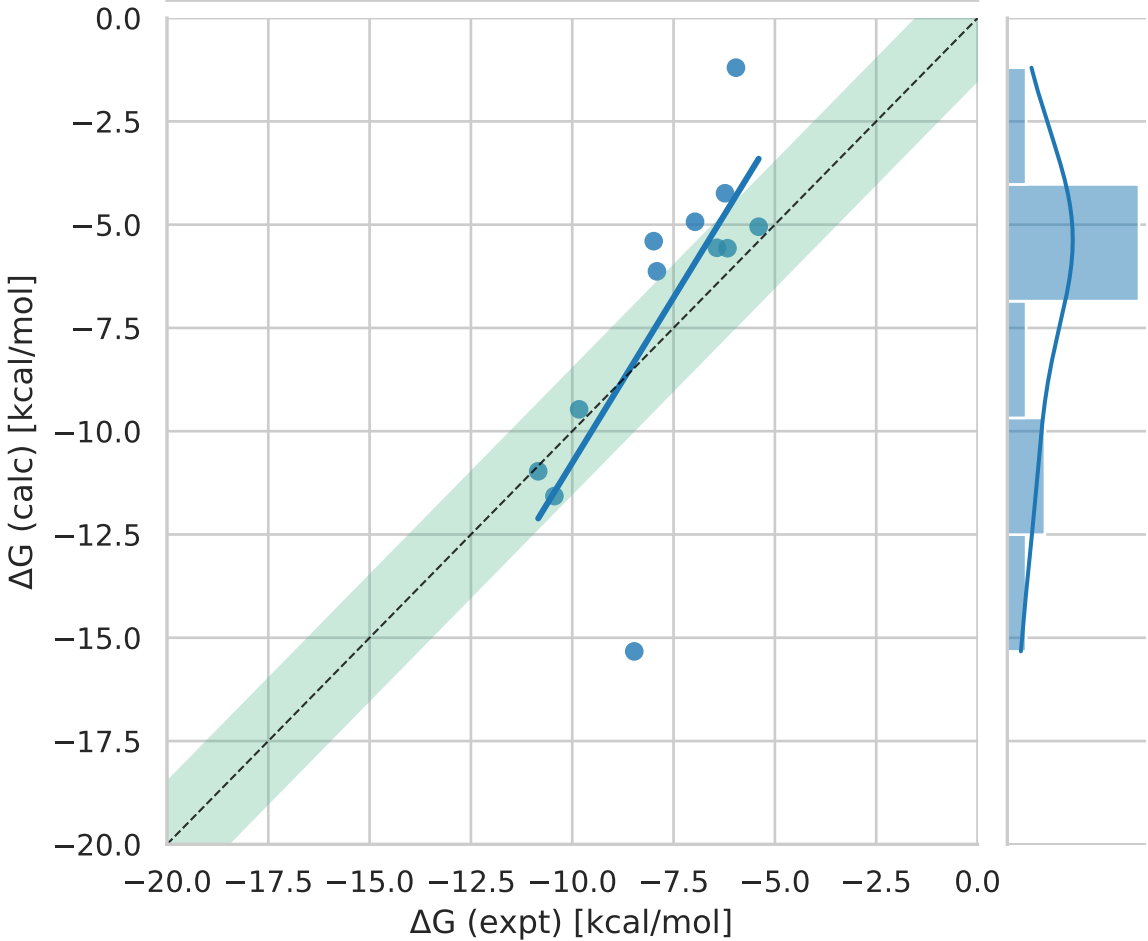

Supplement: d3cp05111k1.zip [file d3cp05111k1.zip]

APR/OFF1.2.0/TIP3P/MD-US/MBAR - HbCD (22)

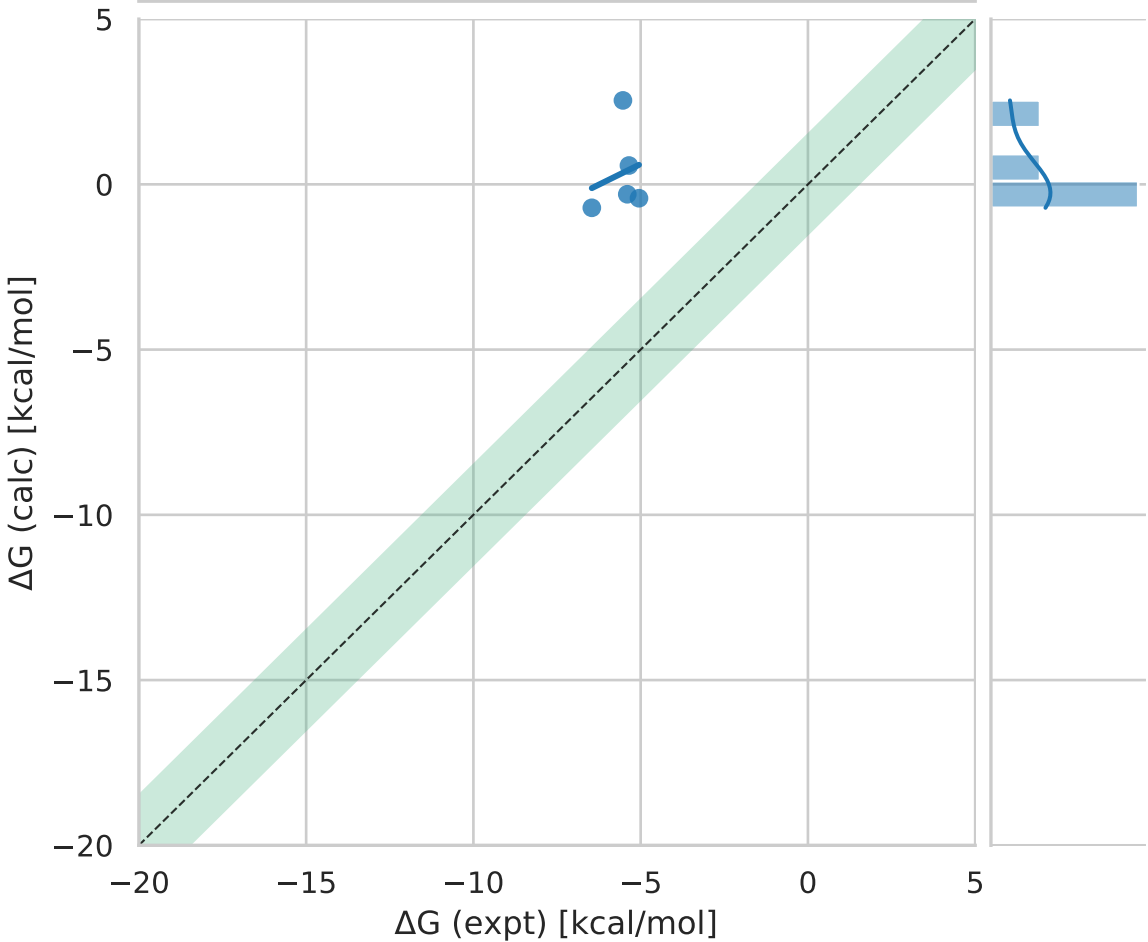

Supplement: d3cp05111k1.zip [file d3cp05111k1.zip]

# ATM/FFENGINE/TIP3P/HREM - CD (14)

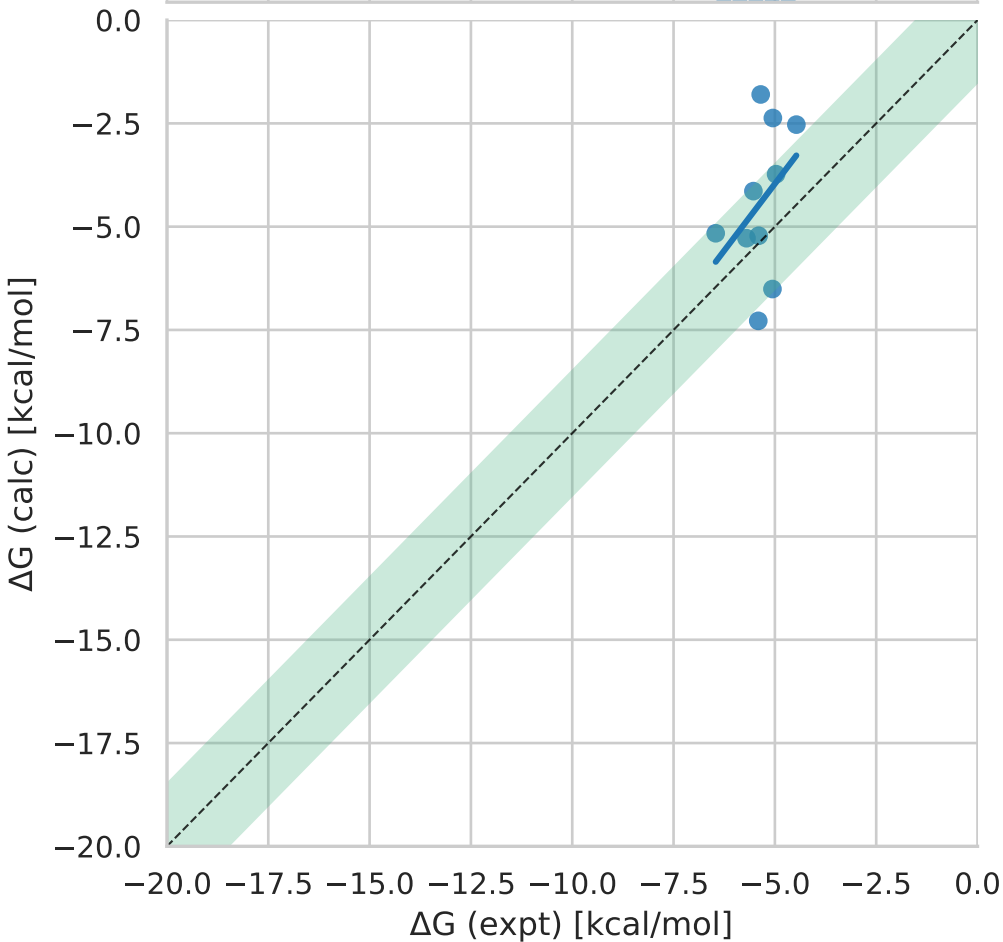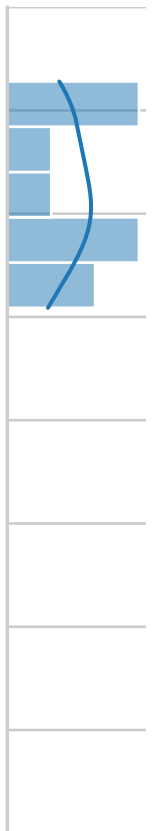

Supplement: d3cp05111k1.zip [file d3cp05111k1.zip]

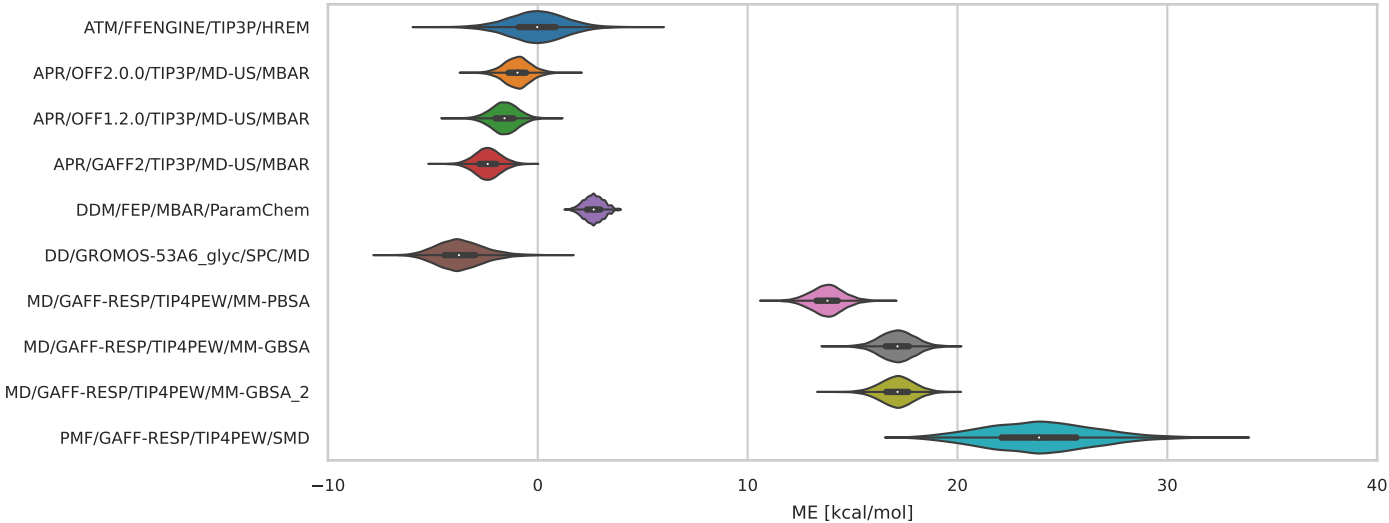

Supplement: d3cp05111k1.zip [file d3cp05111k1.zip]

# PMF/GAFF-RESP/TIP4PEW/SMD - HbCD (10)

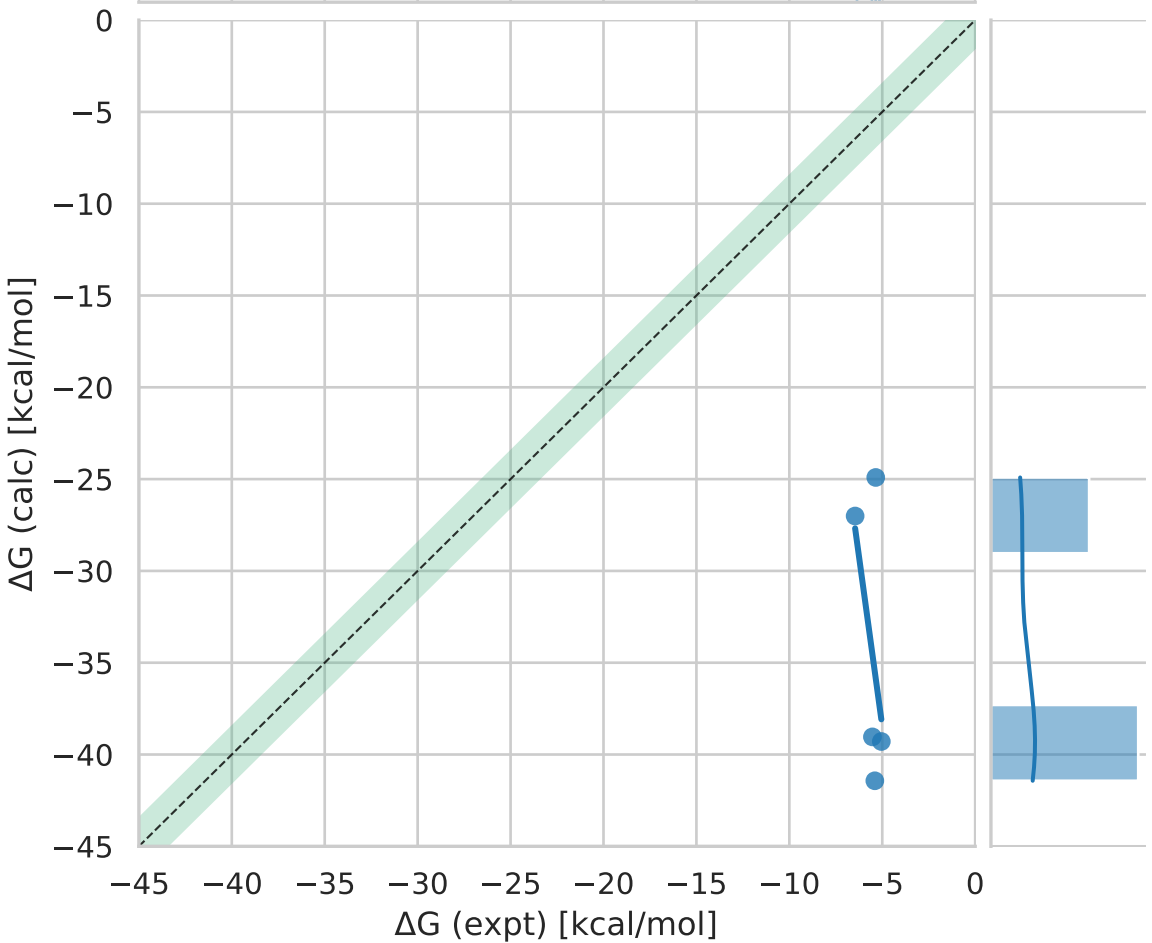

Supplement: d3cp05111k1.zip [file d3cp05111k1.zip]

# ATM/FFENGINE/TIP3P/HREM - HbCD (14)

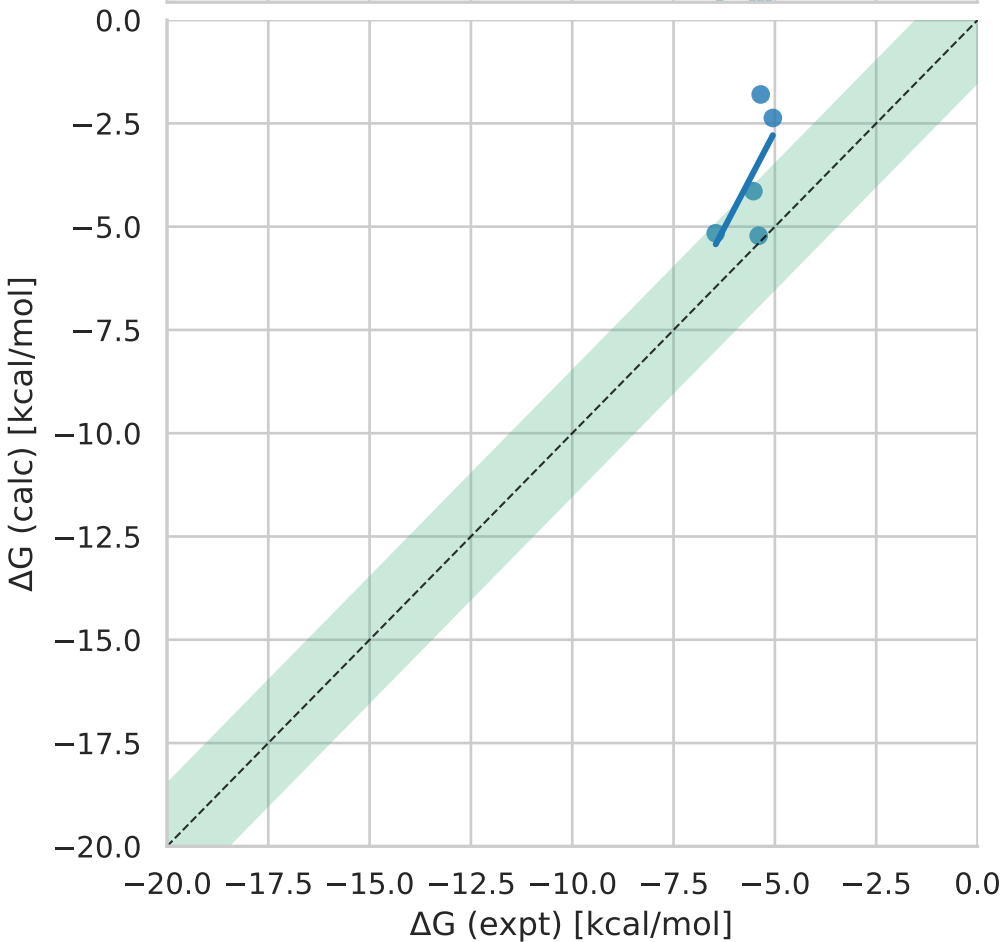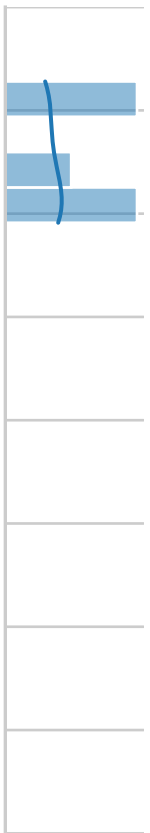

Supplement: d3cp05111k1.zip [file d3cp05111k1.zip]

# MACHINE-LEARNING/NNET/DRAGON-descriptors - WP6 (3)

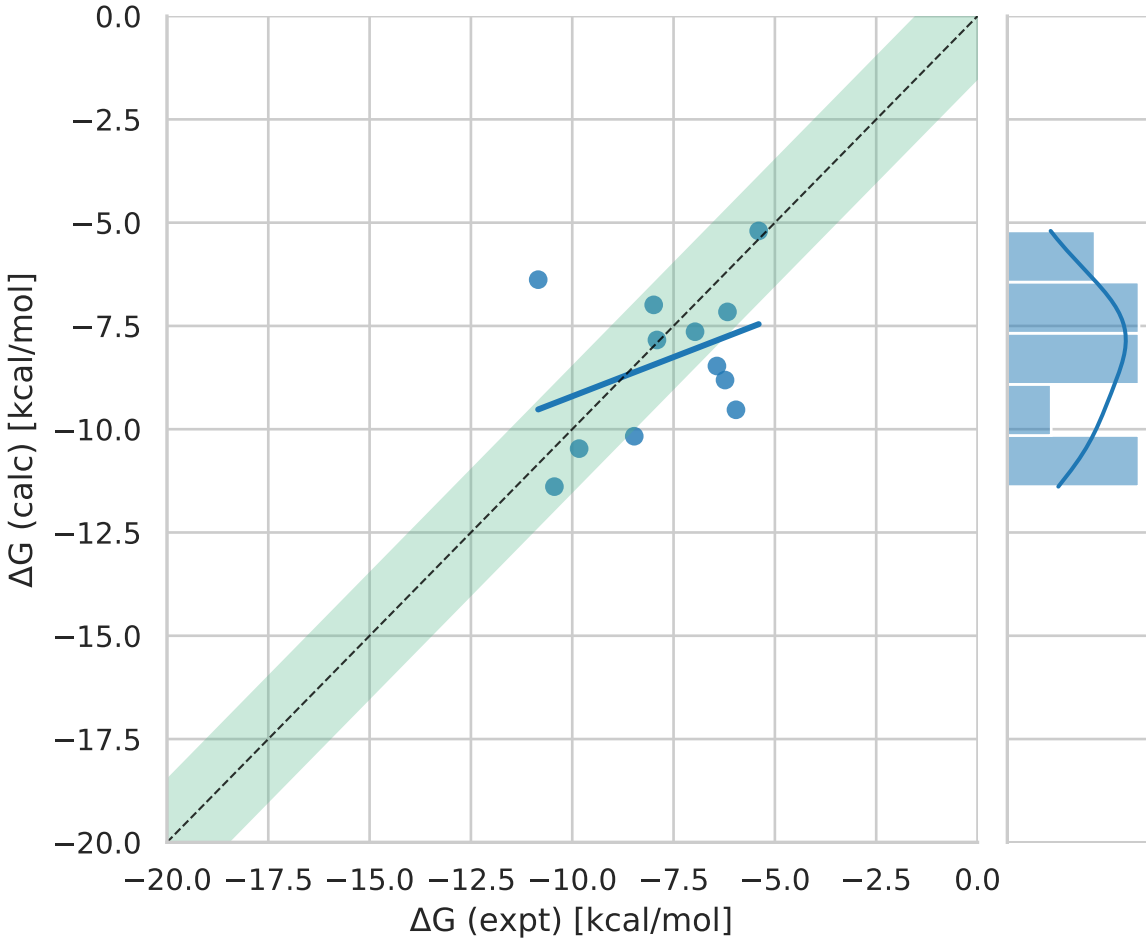

Supplement: d3cp05111k1.zip [file d3cp05111k1.zip]

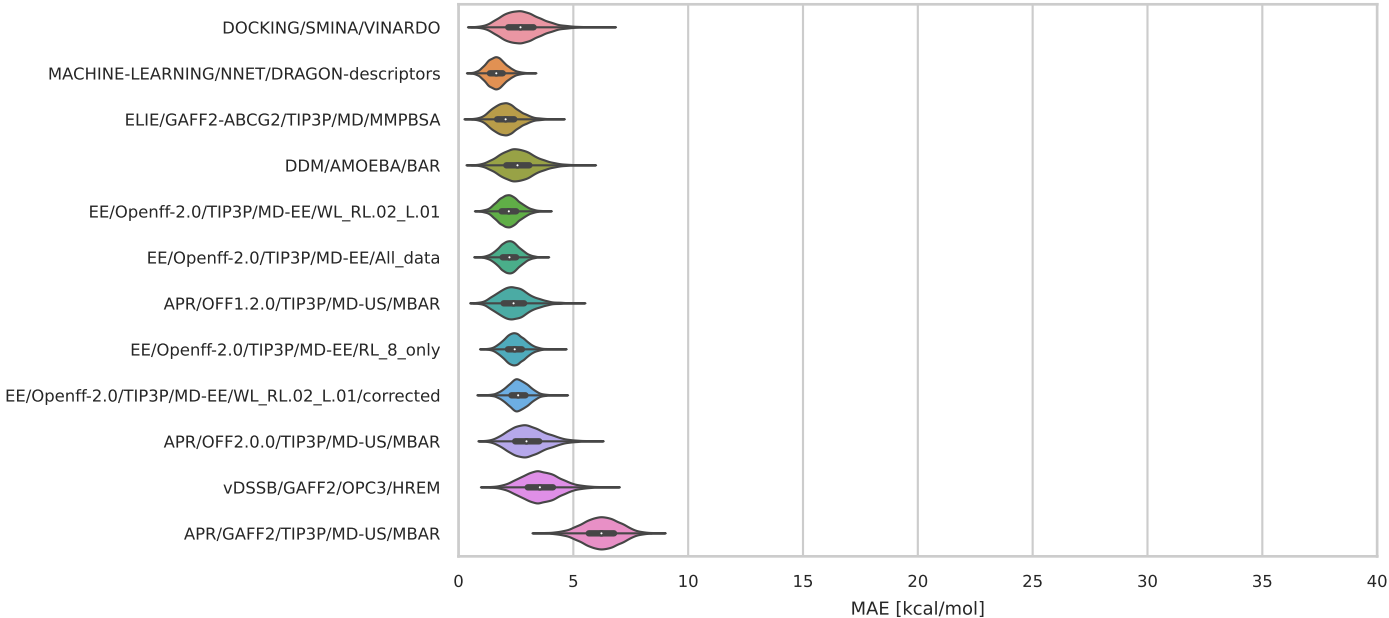

Supplement: d3cp05111k1.zip [file d3cp05111k1.zip]

# ATM/FFENGINE/TIP3P/HREM - HbCD (14)

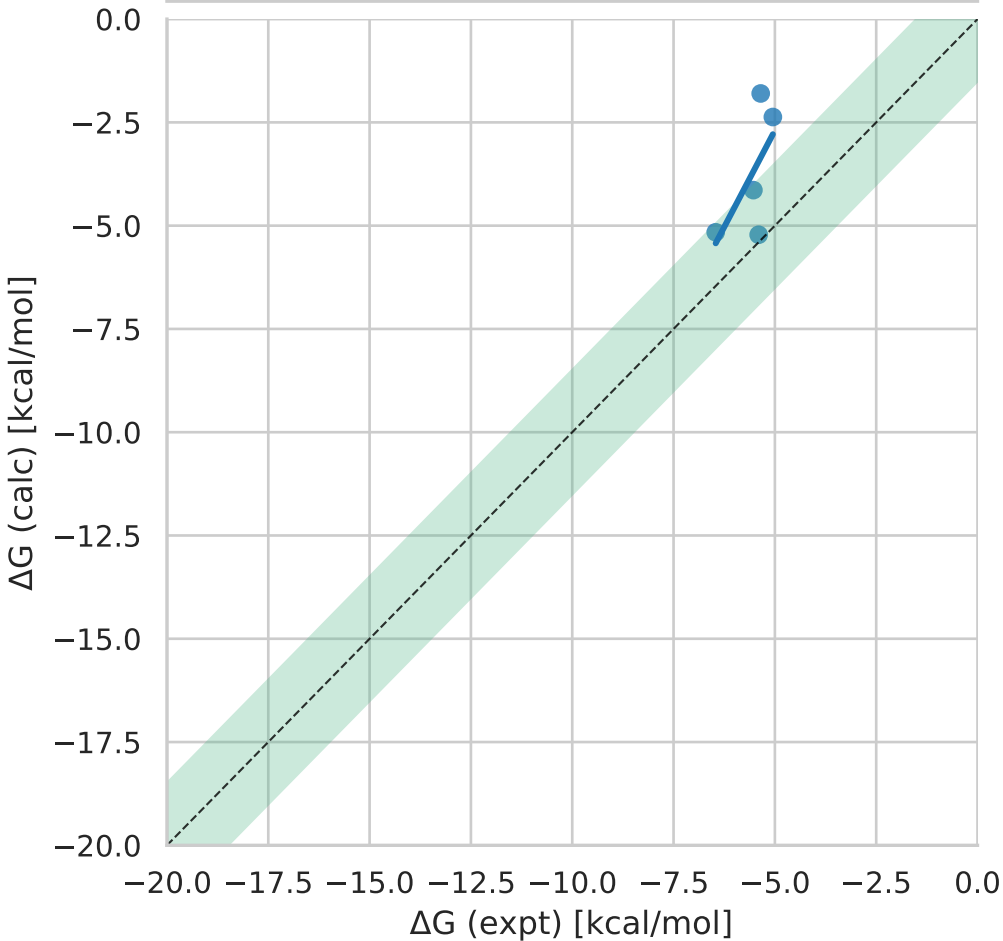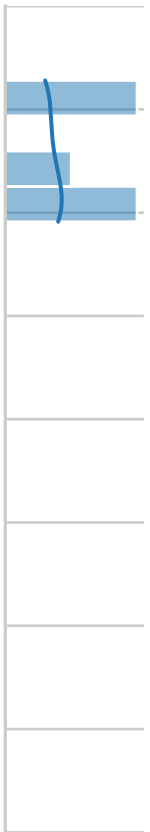

Supplement: d3cp05111k1.zip [file d3cp05111k1.zip]

# MACHINE-LEARNING/NNET/DRAGON-descriptors - WP6 (3)

$\Delta H$  (calc) [kcal/mol]

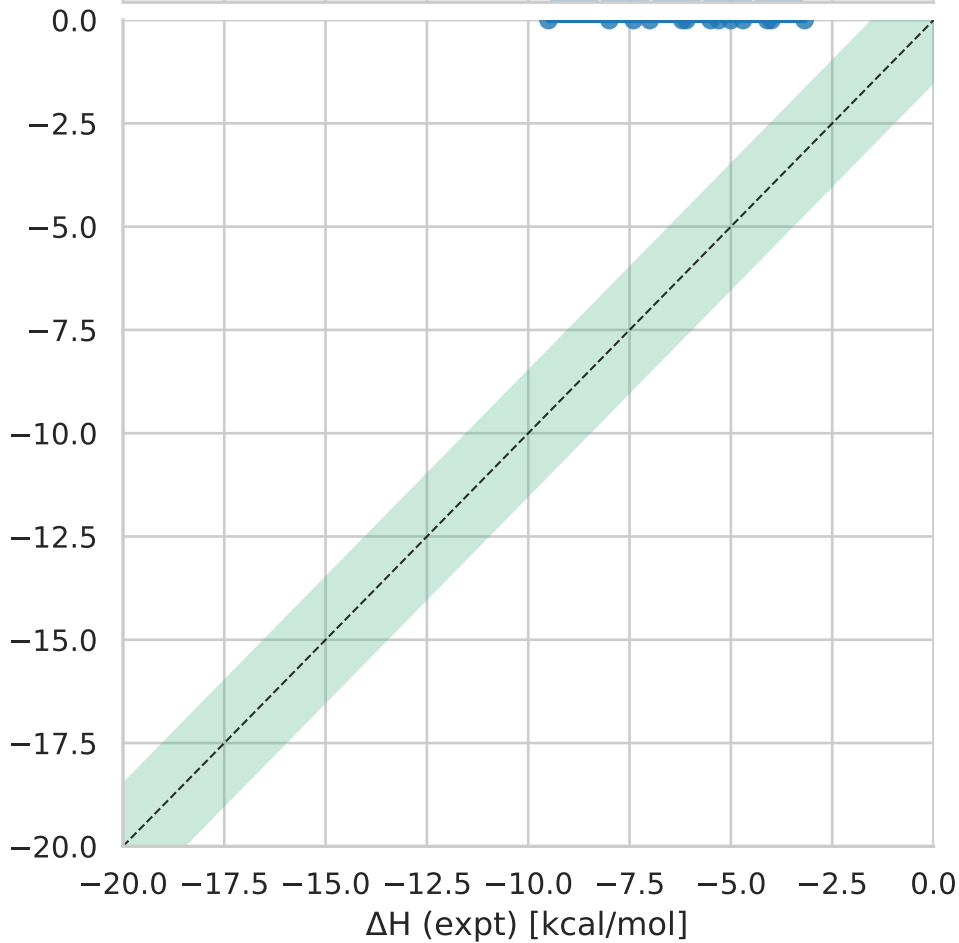

Supplement: d3cp05111k1.zip [file d3cp05111k1.zip]

MD/GAFF-RESP/TIP4PEW/MM-GBSA 2 - bCD (15)

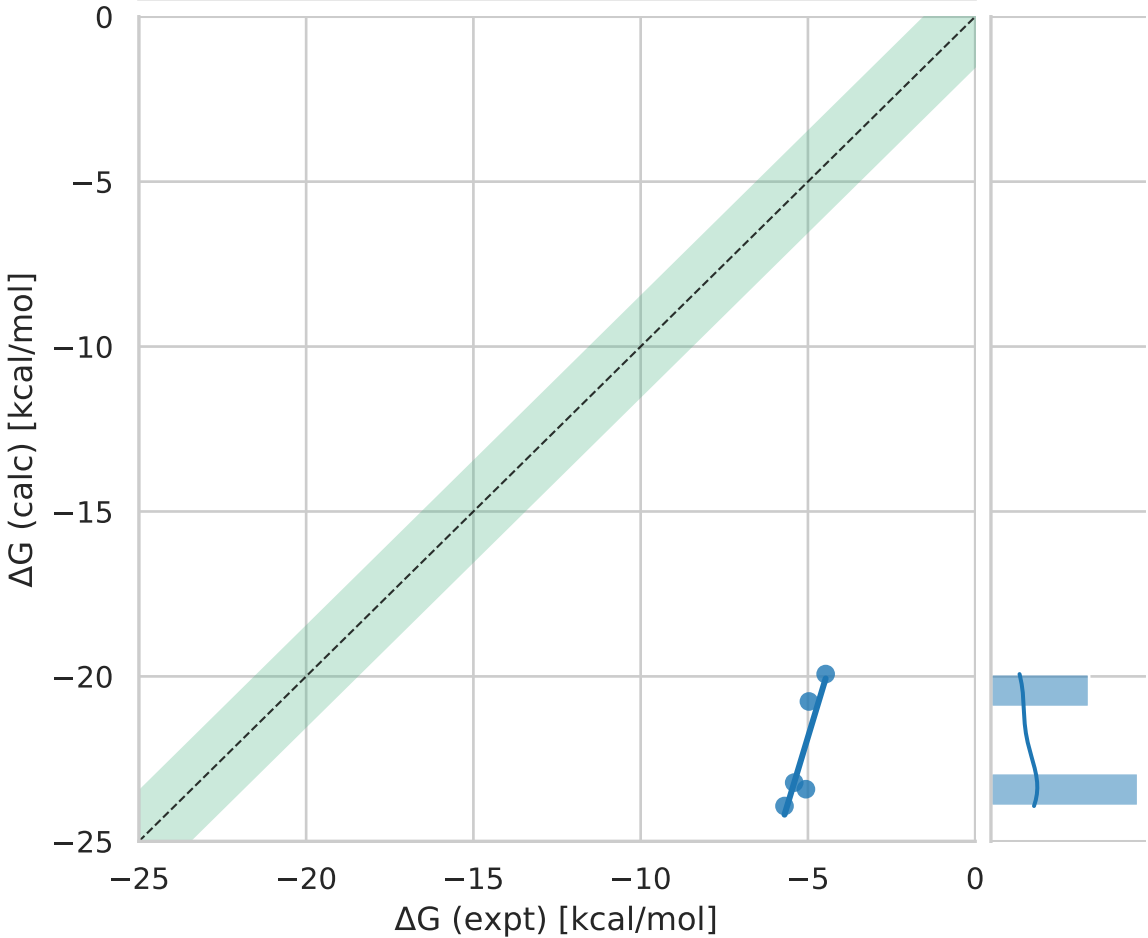

Supplement: d3cp05111k1.zip [file d3cp05111k1.zip]

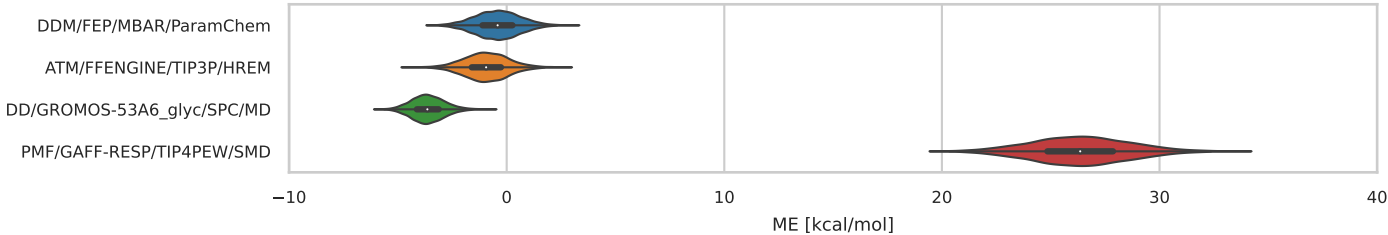

Supplement: d3cp05111k1.zip [file d3cp05111k1.zip]

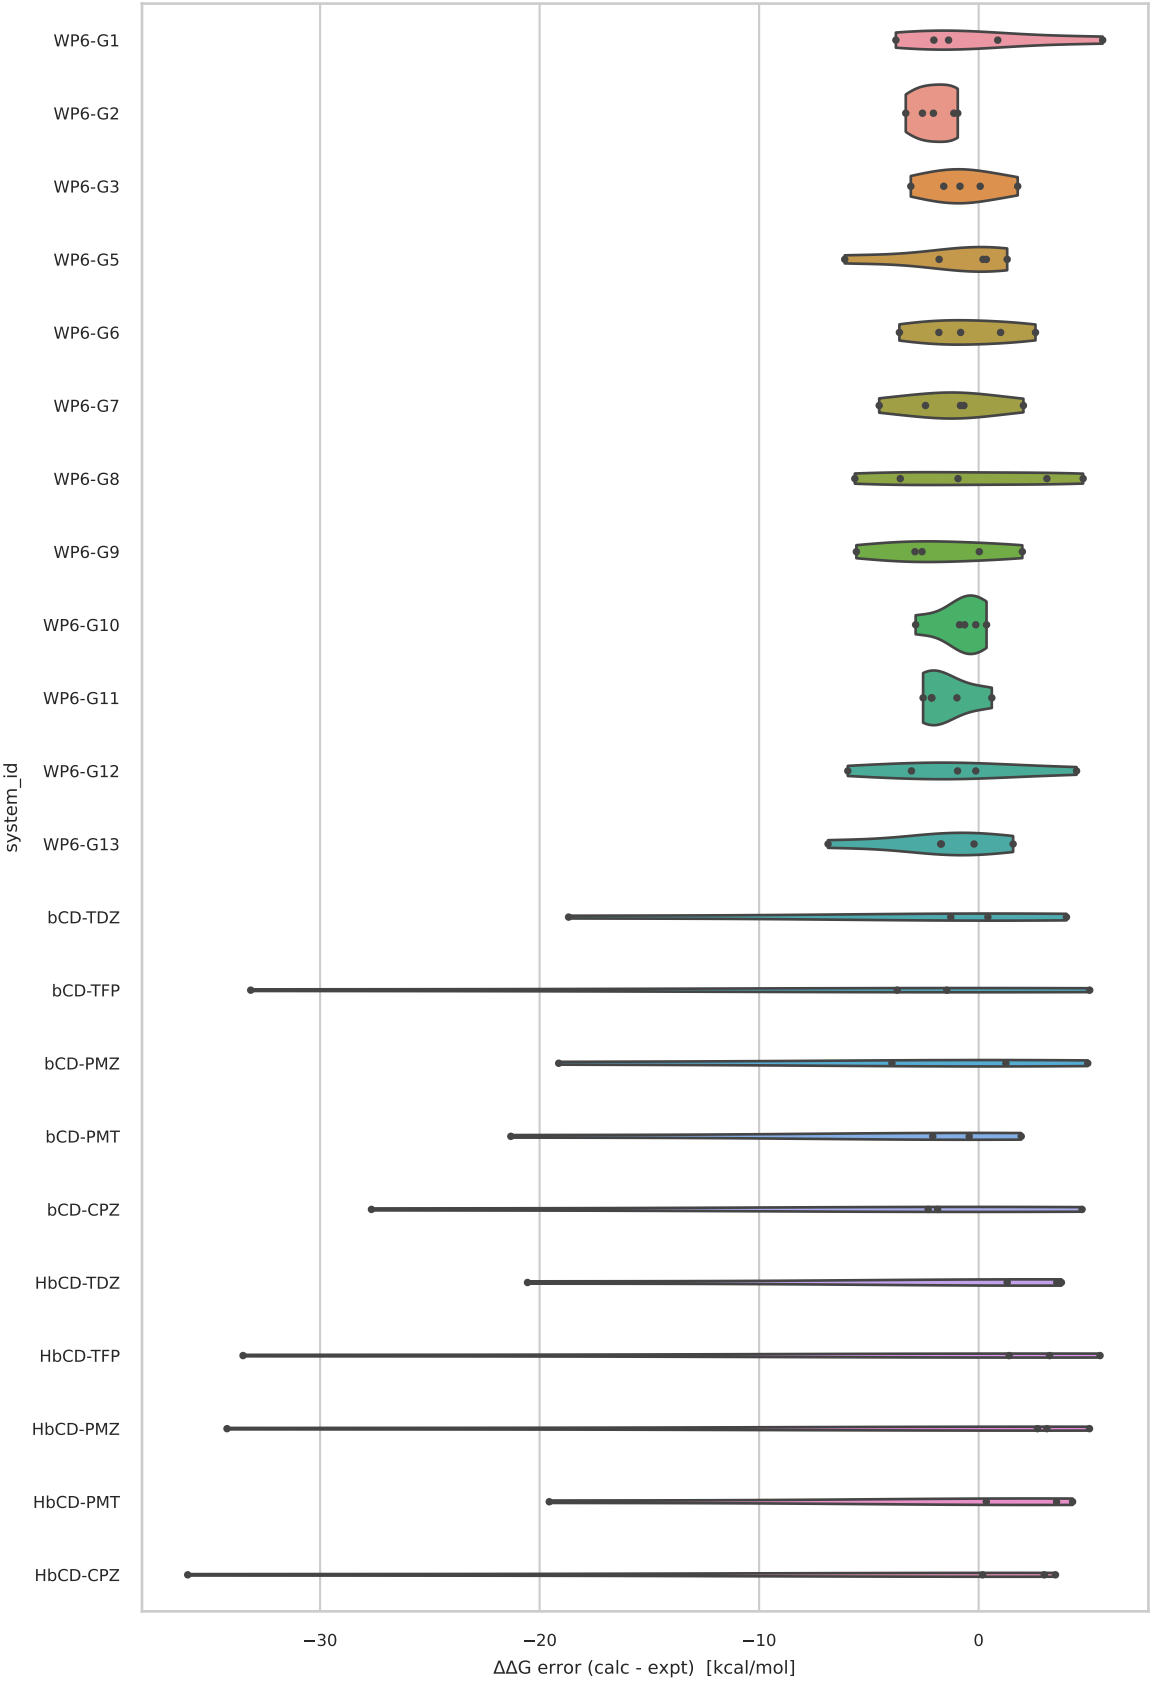

Supplement: d3cp05111k1.zip [file d3cp05111k1.zip]

EE/Openff-2.0/TIP3P/MD-EE/All data - WP6 (5)

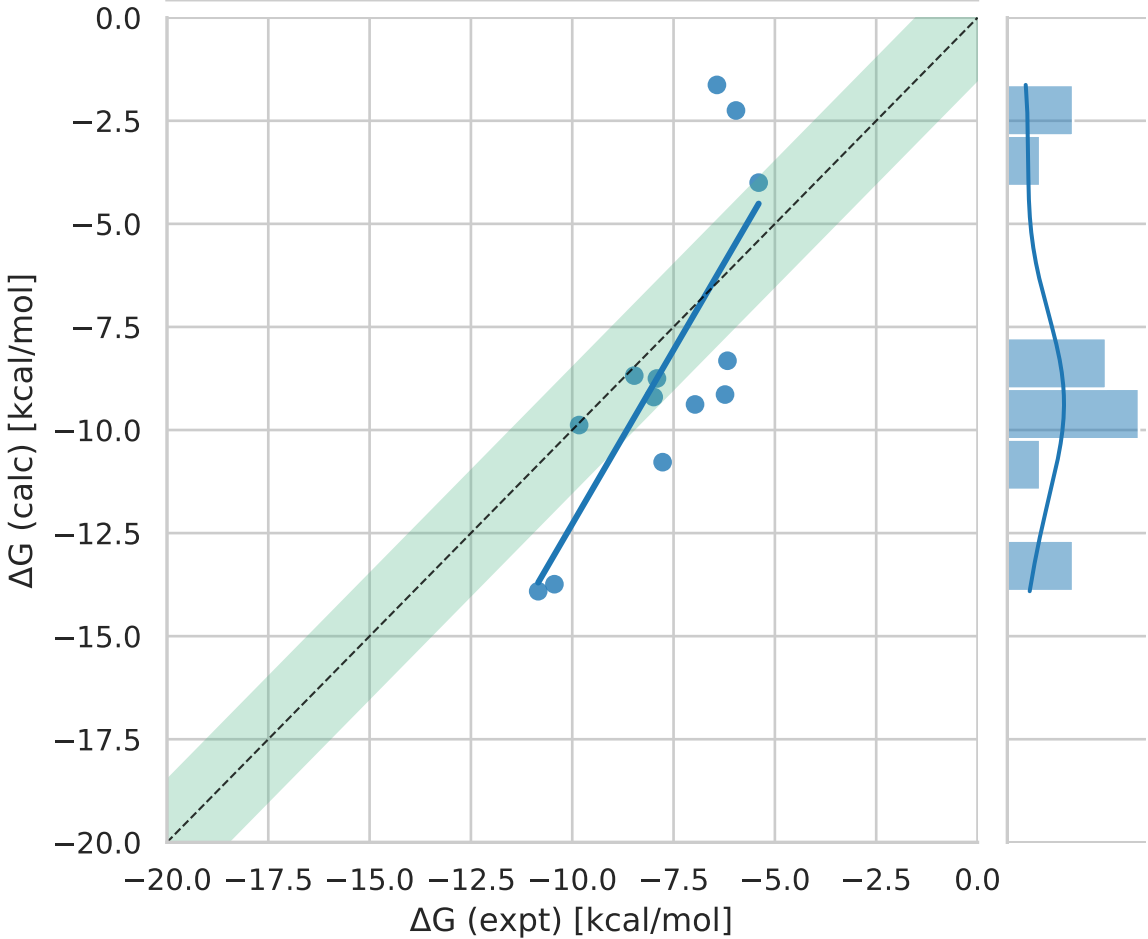

Supplement: d3cp05111k1.zip [file d3cp05111k1.zip]

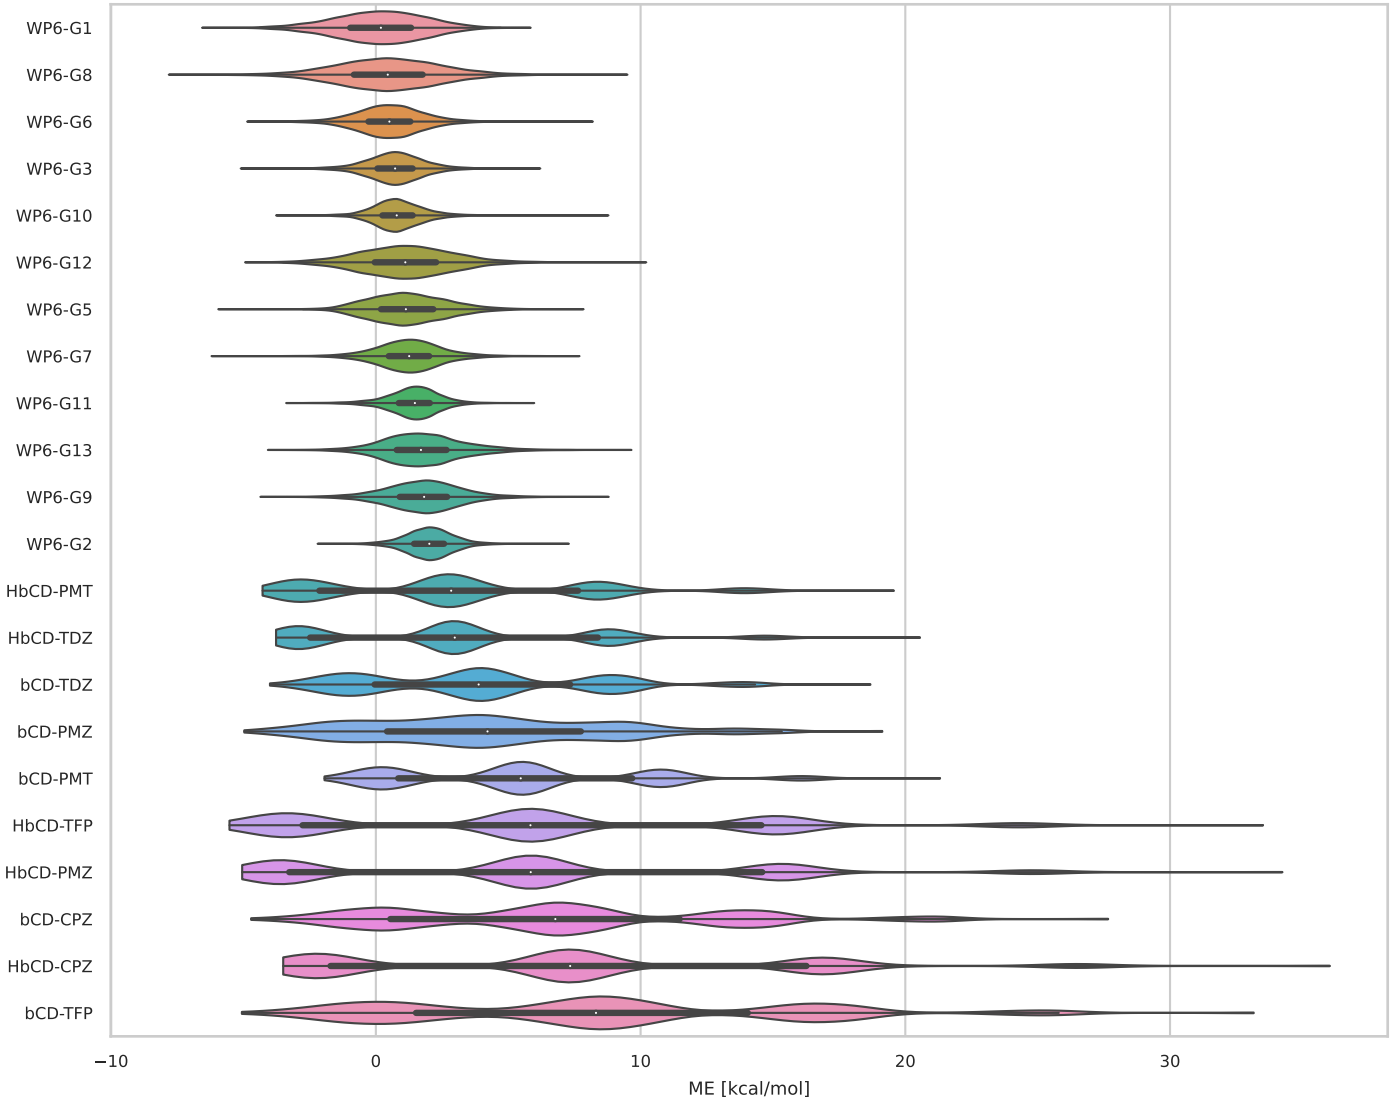

Supplement: d3cp05111k1.zip [file d3cp05111k1.zip]

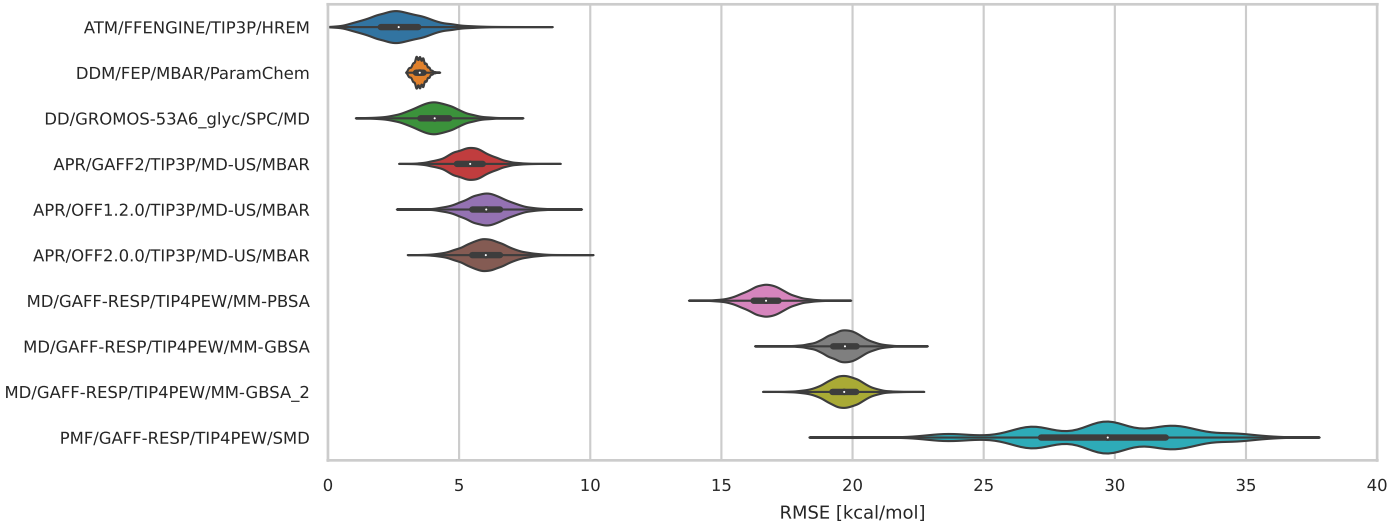

Supplement: d3cp05111k1.zip [file d3cp05111k1.zip]

# ELIE/GAFF2-ABCG2/TIP3P/MD/MMPBSA - WP6 (8)

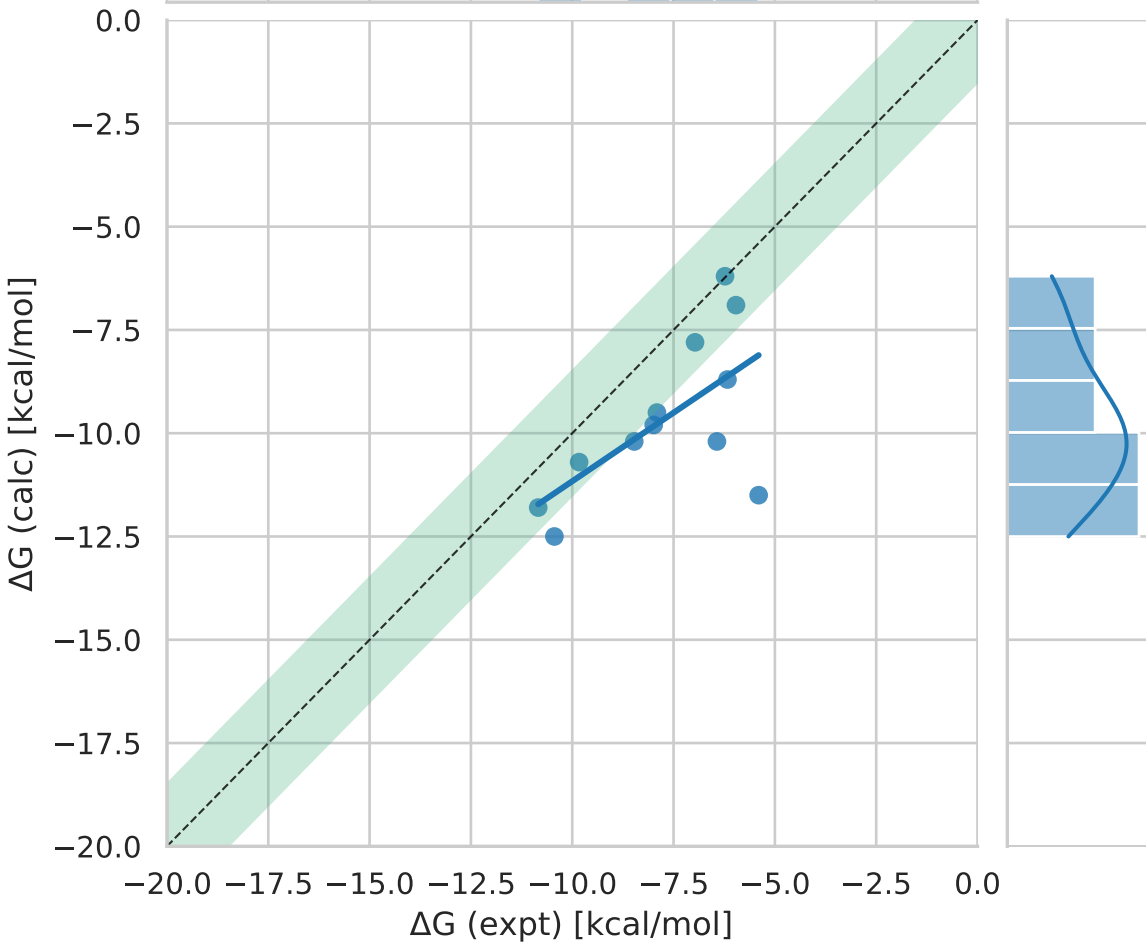

Supplement: d3cp05111k1.zip [file d3cp05111k1.zip]

PMF/GAFF-RESP/TIP4PEW/SMD - CD (10)

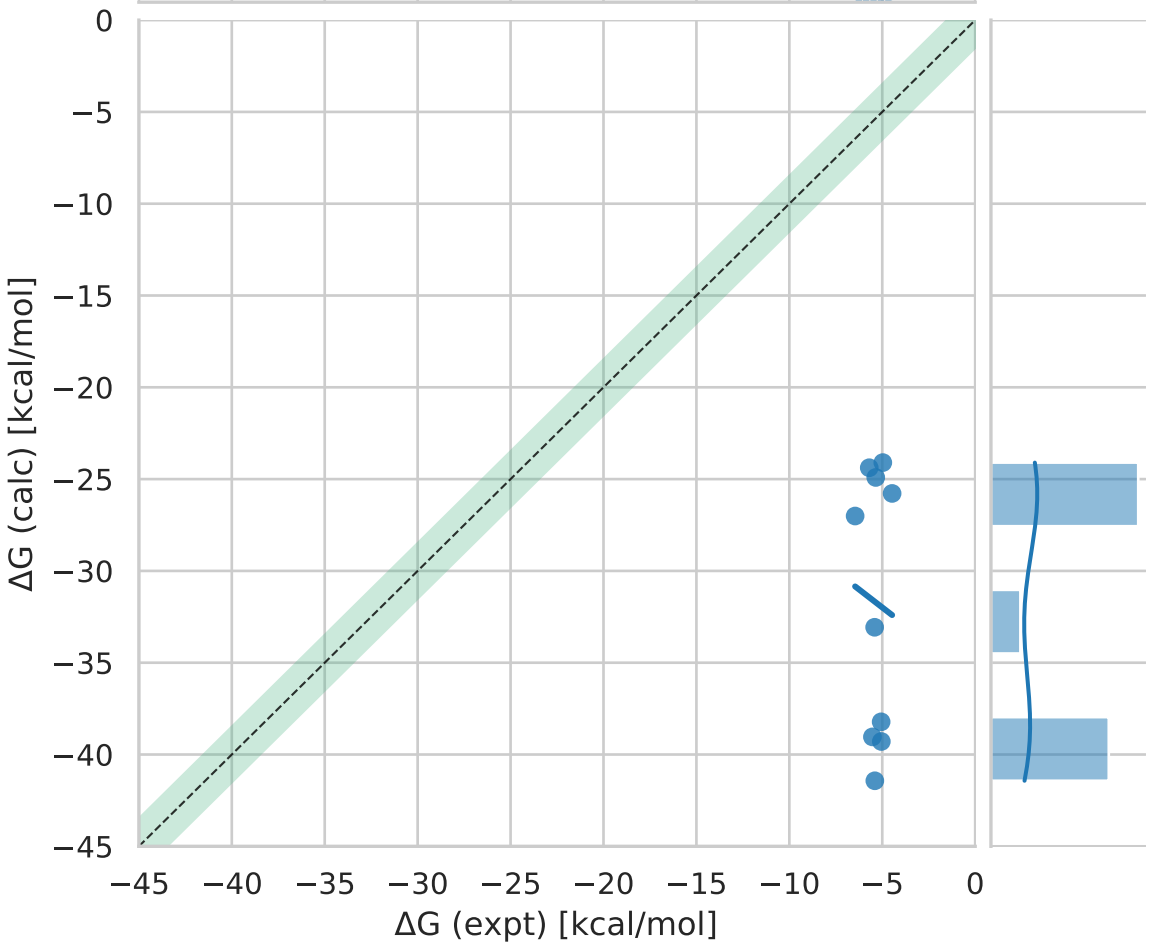

Supplement: d3cp05111k1.zip [file d3cp05111k1.zip]

# ELIE/GAFF2-ABCG2/TIP3P/MD/MMPBSA - WP6 (8)



Supplement: d3cp05111k1.zip [file d3cp05111k1.zip]

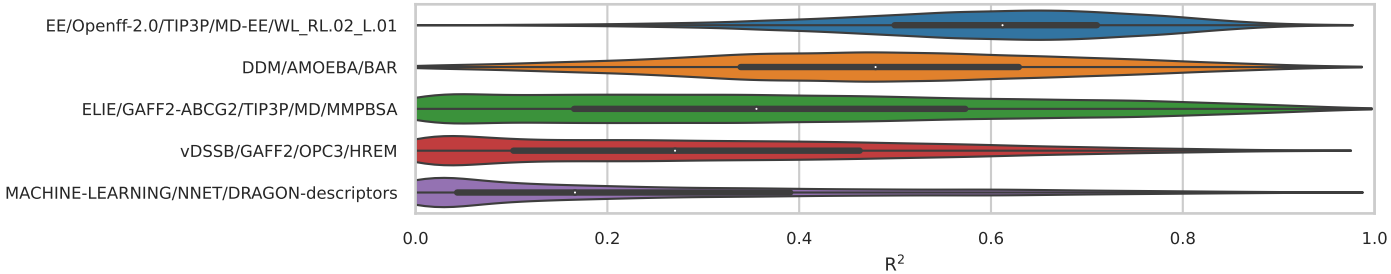

Supplement: d3cp05111k1.zip [file d3cp05111k1.zip]

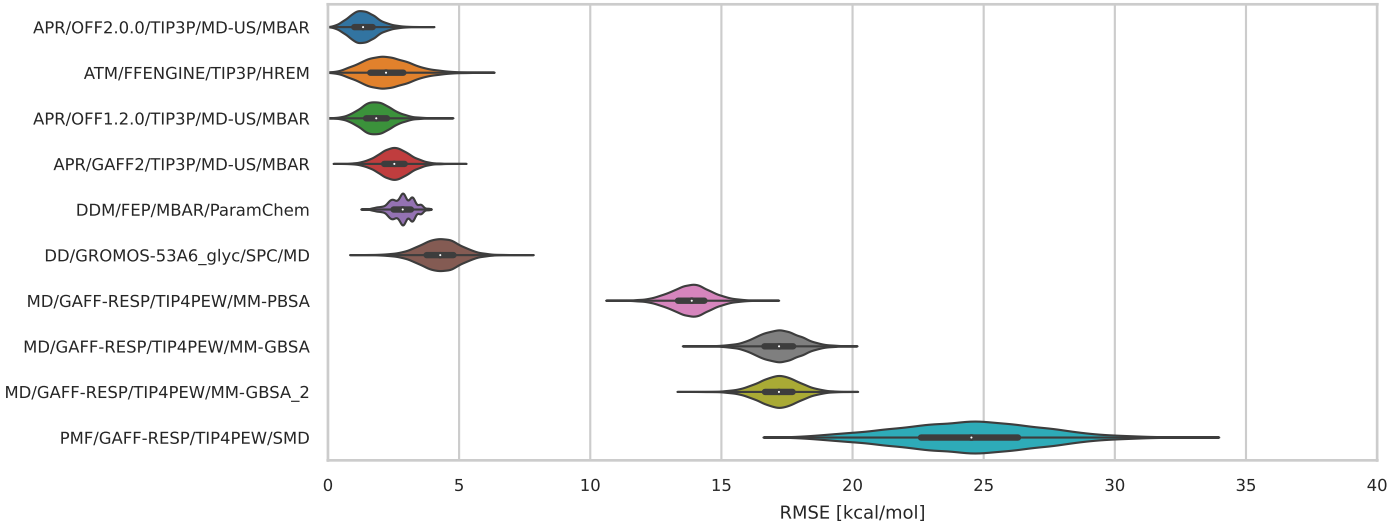

Supplement: d3cp05111k1.zip [file d3cp05111k1.zip]

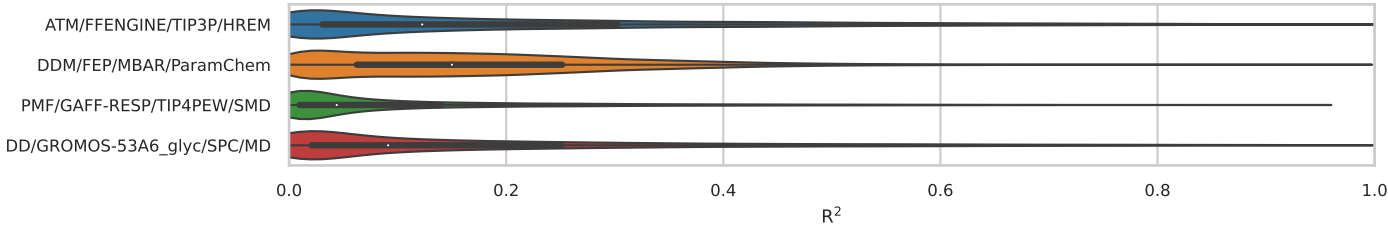

Supplement: d3cp05111k1.zip [file d3cp05111k1.zip]

# APR/GAFF2/TIP3P/MD-US/MBAR - HbCD (21)

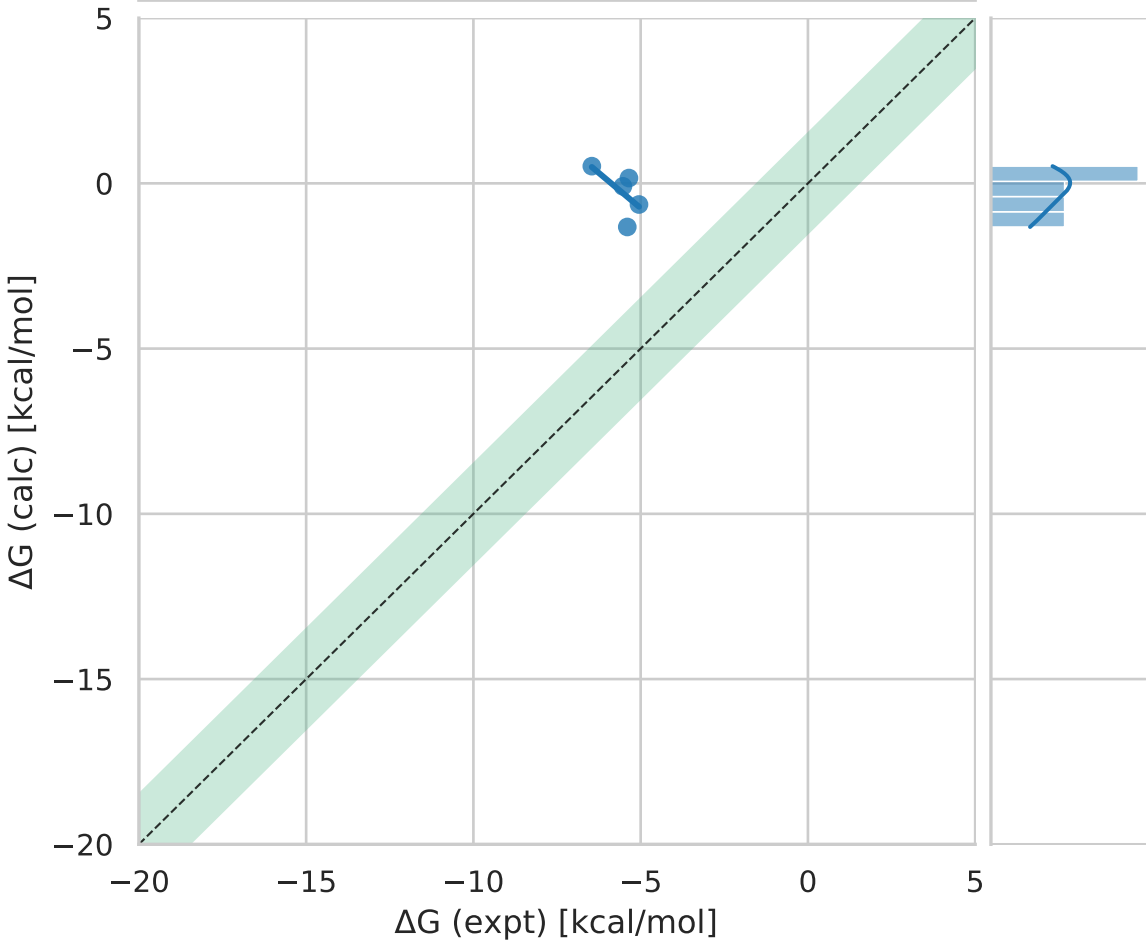

Supplement: d3cp05111k1.zip [file d3cp05111k1.zip]

DDM/FEP/MBAR/ParamChem - CD (16)

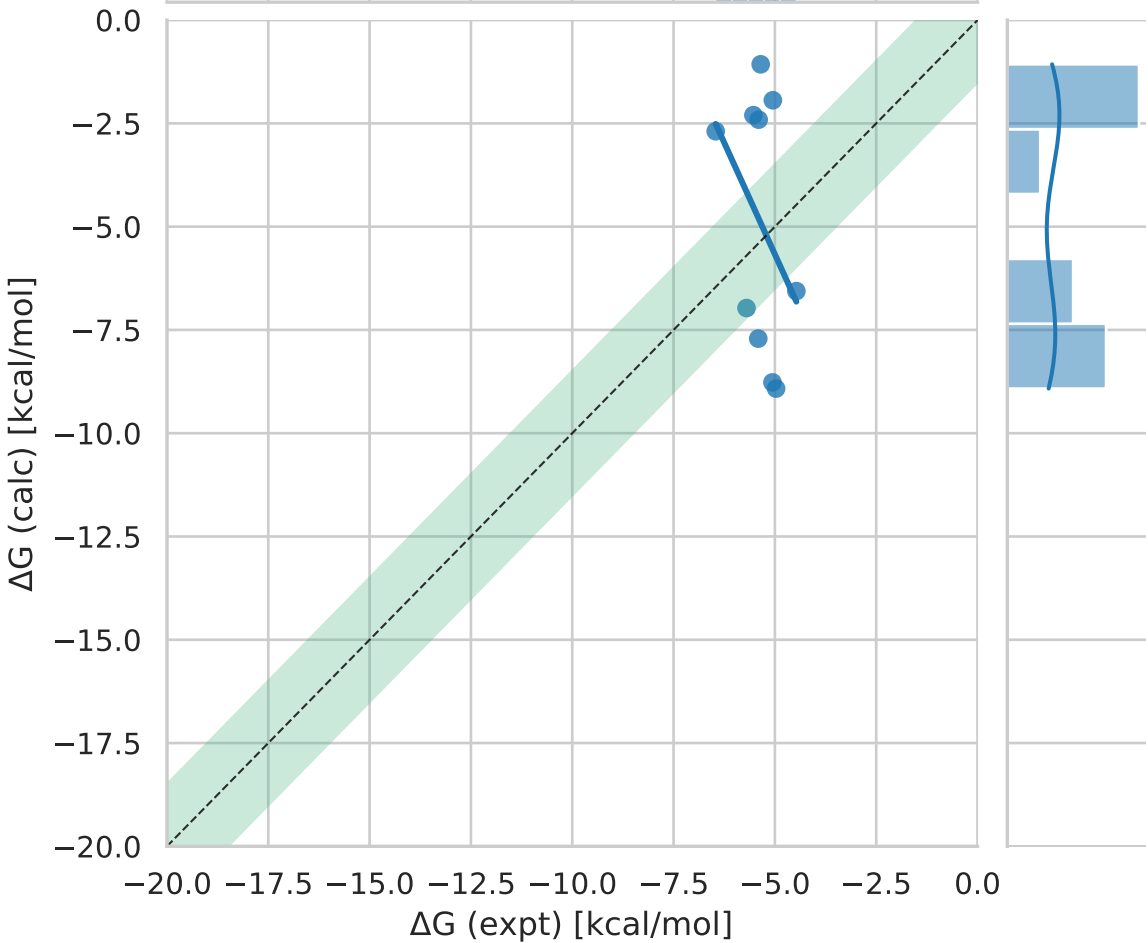

Supplement: d3cp05111k1.zip [file d3cp05111k1.zip]

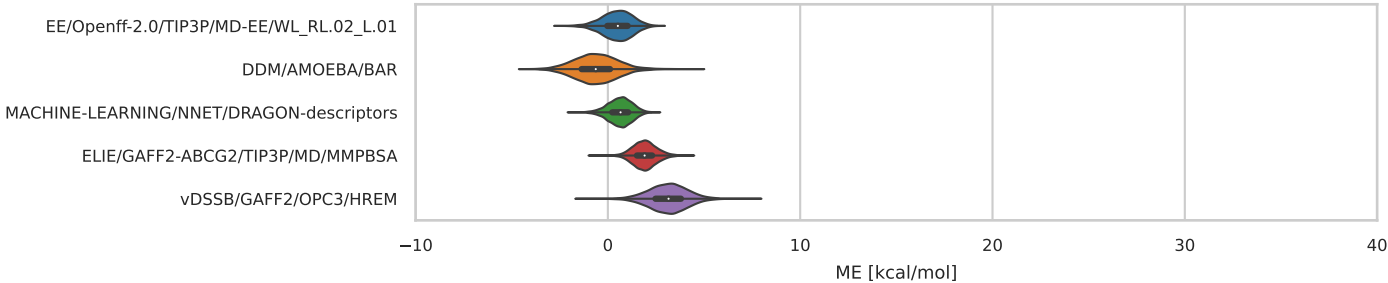

Supplement: d3cp05111k1.zip [file d3cp05111k1.zip]

EE/Openff-2.0/TIP3P/MD-EE/RL\_8 only - WP6 (6)

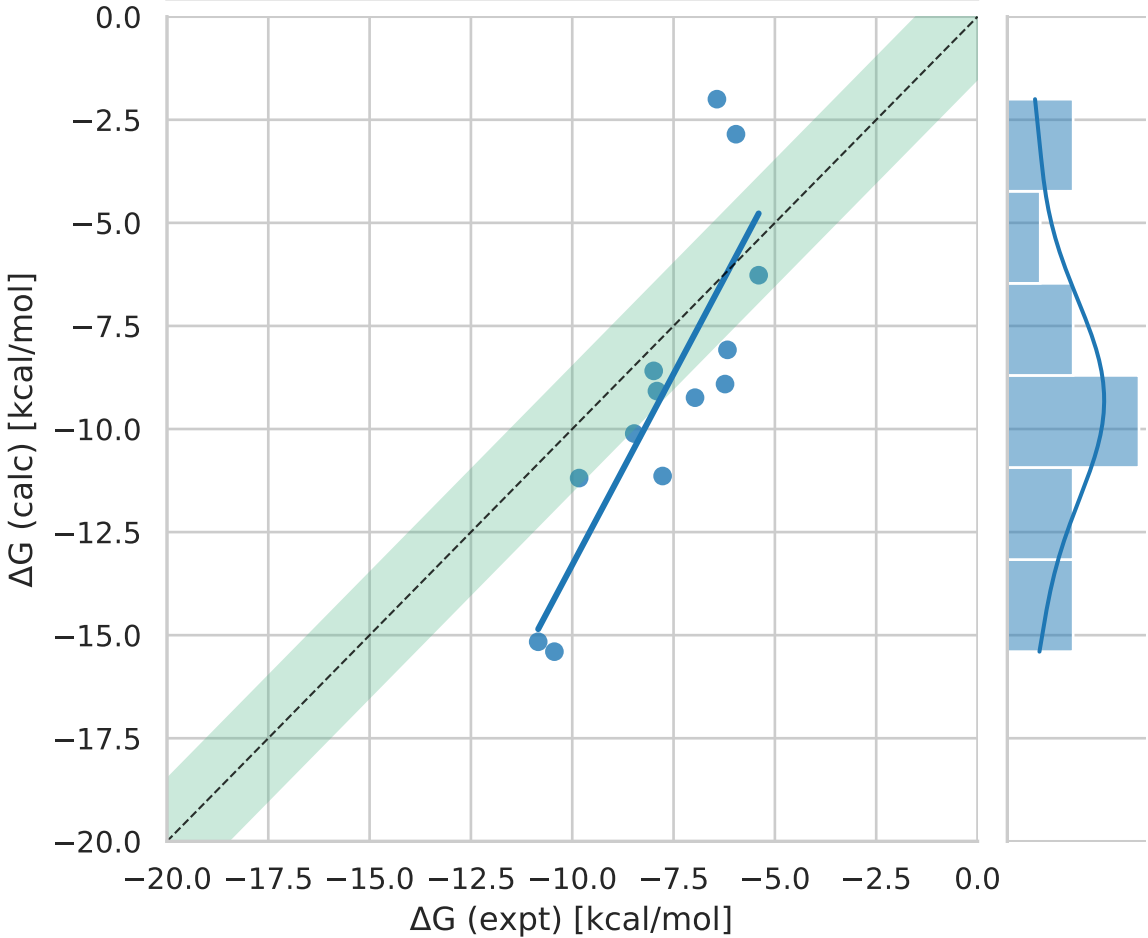

Supplement: d3cp05111k1.zip [file d3cp05111k1.zip]

APR/OFF2.0.0/TIP3P/MD-US/MBAR - bCD (23)

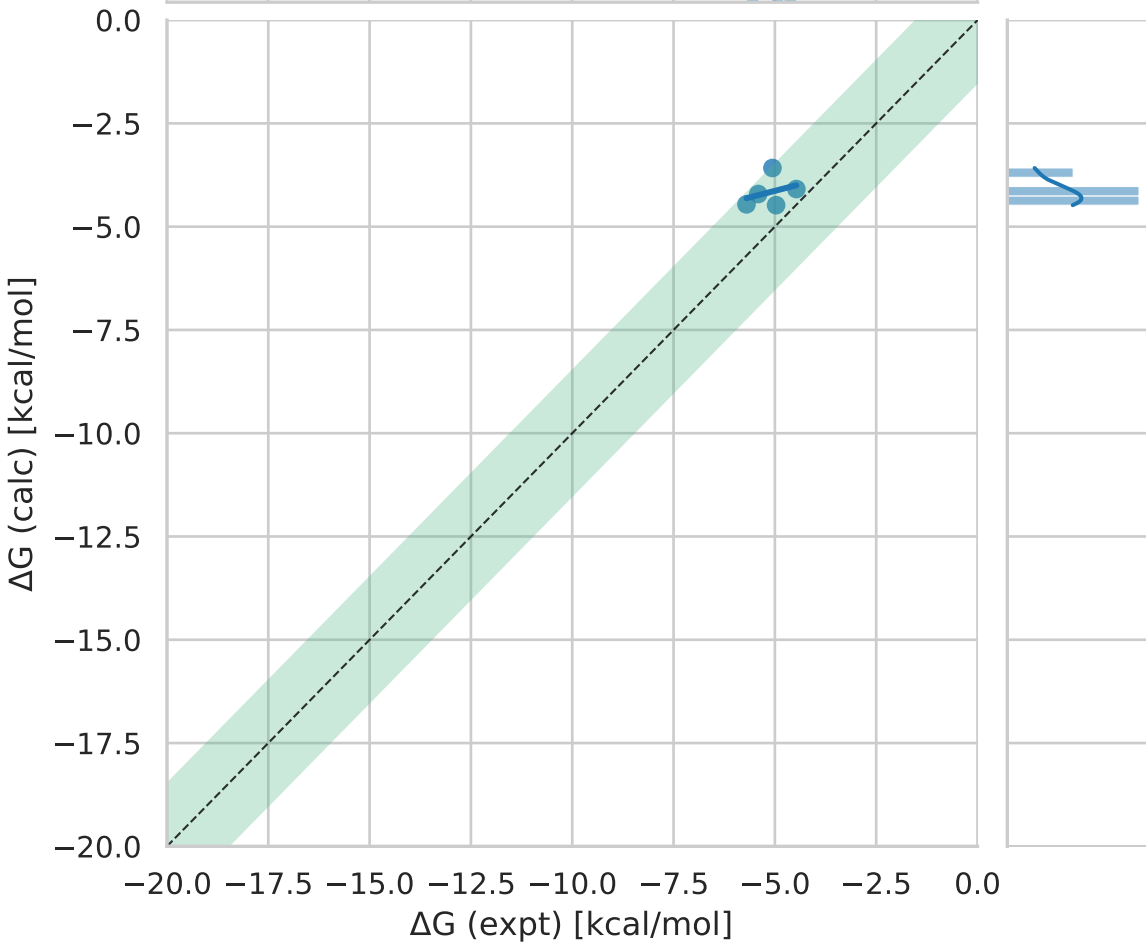

Supplement: d3cp05111k1.zip [file d3cp05111k1.zip]

DD/GROMOS-53A6\_glyc/SPC/MD - CD (11)

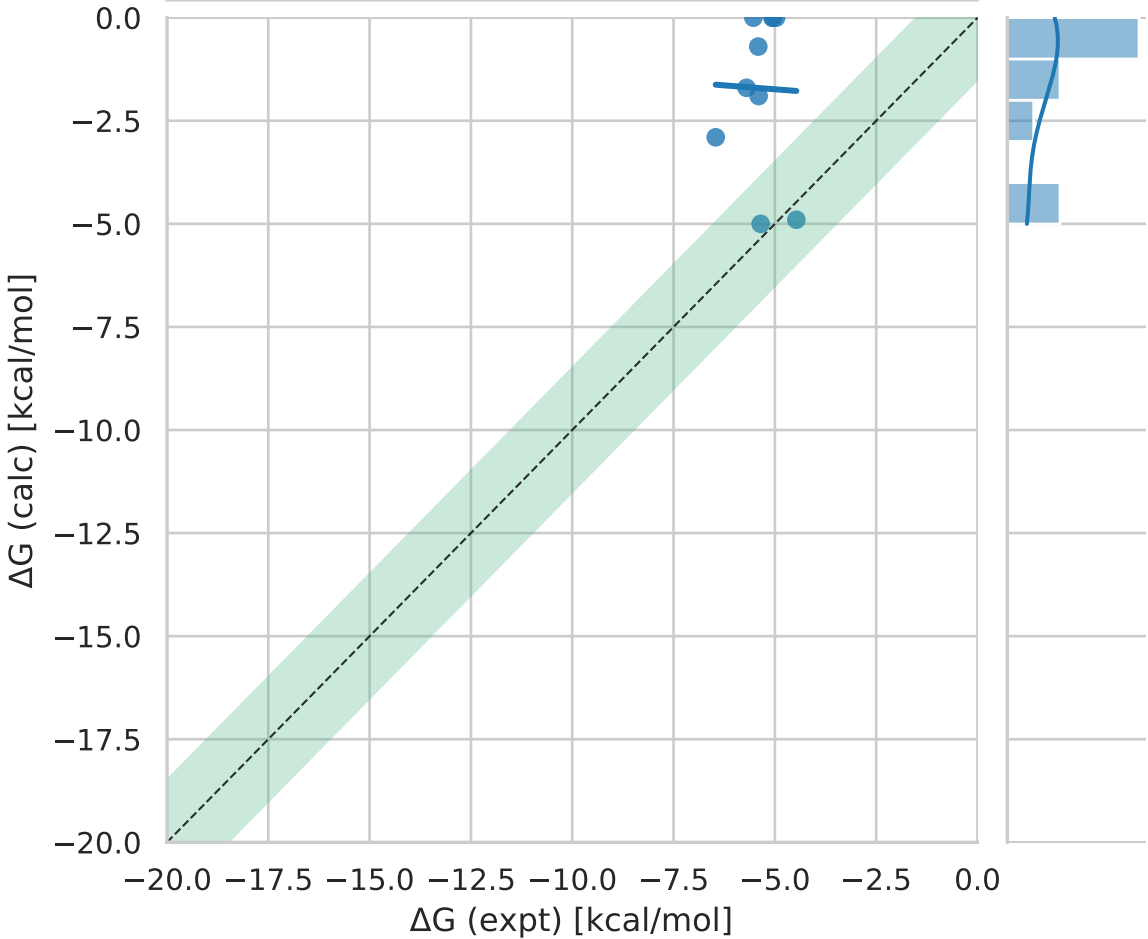

Supplement: d3cp05111k1.zip [file d3cp05111k1.zip]

# MD/GAFF-RESP/TIP4PEW/MM-PBSA - HbCD (13)

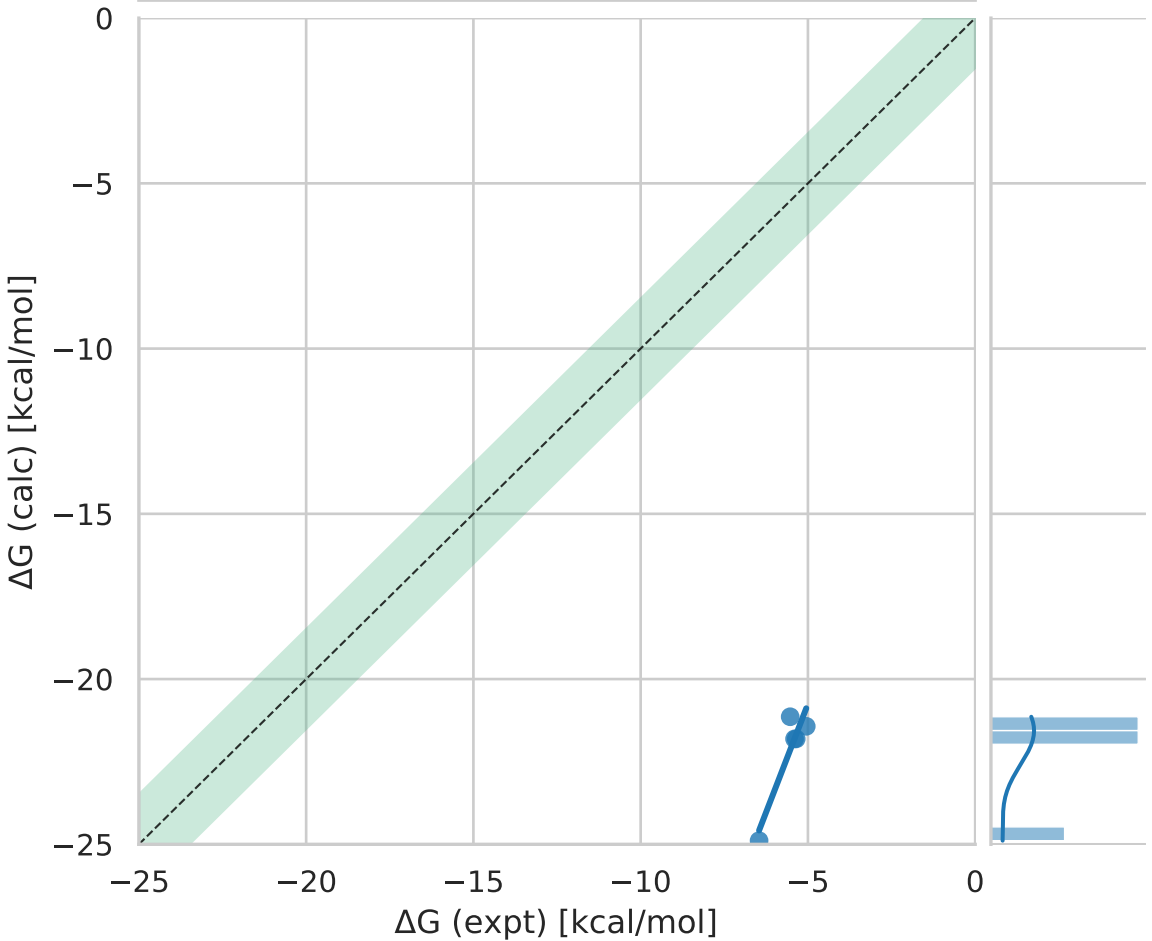

Supplement: d3cp05111k1.zip [file d3cp05111k1.zip]

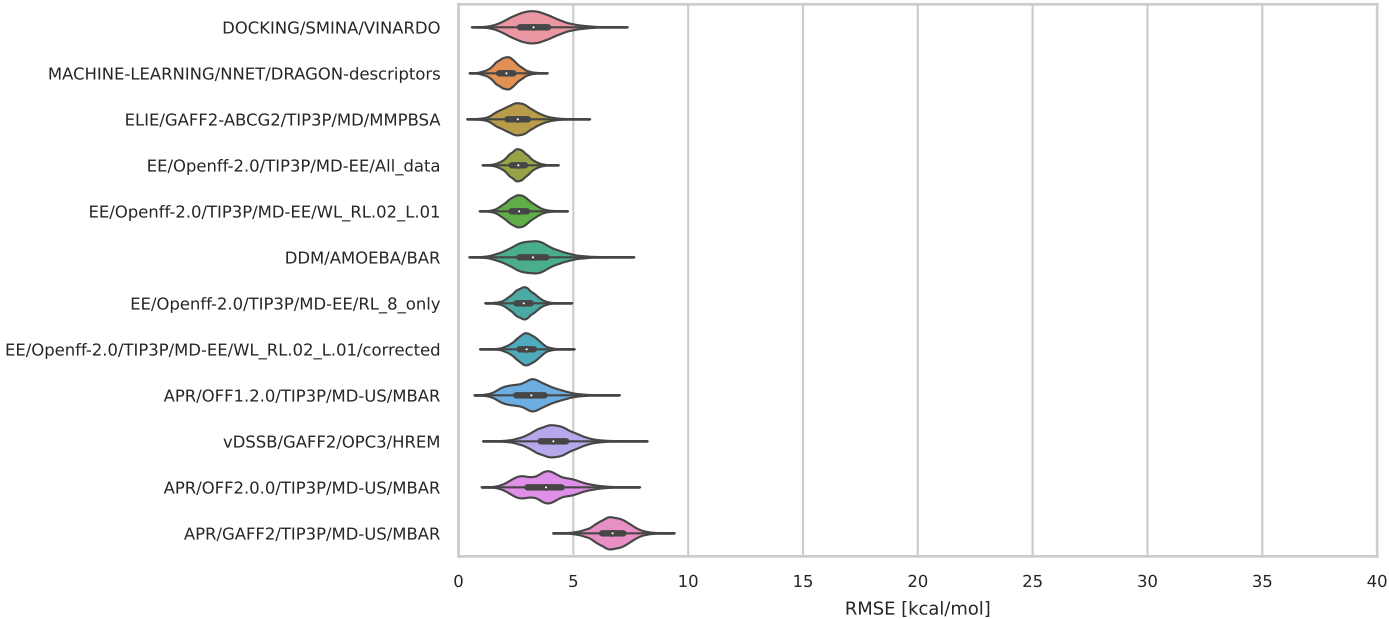

Supplement: d3cp05111k1.zip [file d3cp05111k1.zip]

MD/GAFF-RESP/TIP4PEW/MM-GBSA 2 - CD (15)

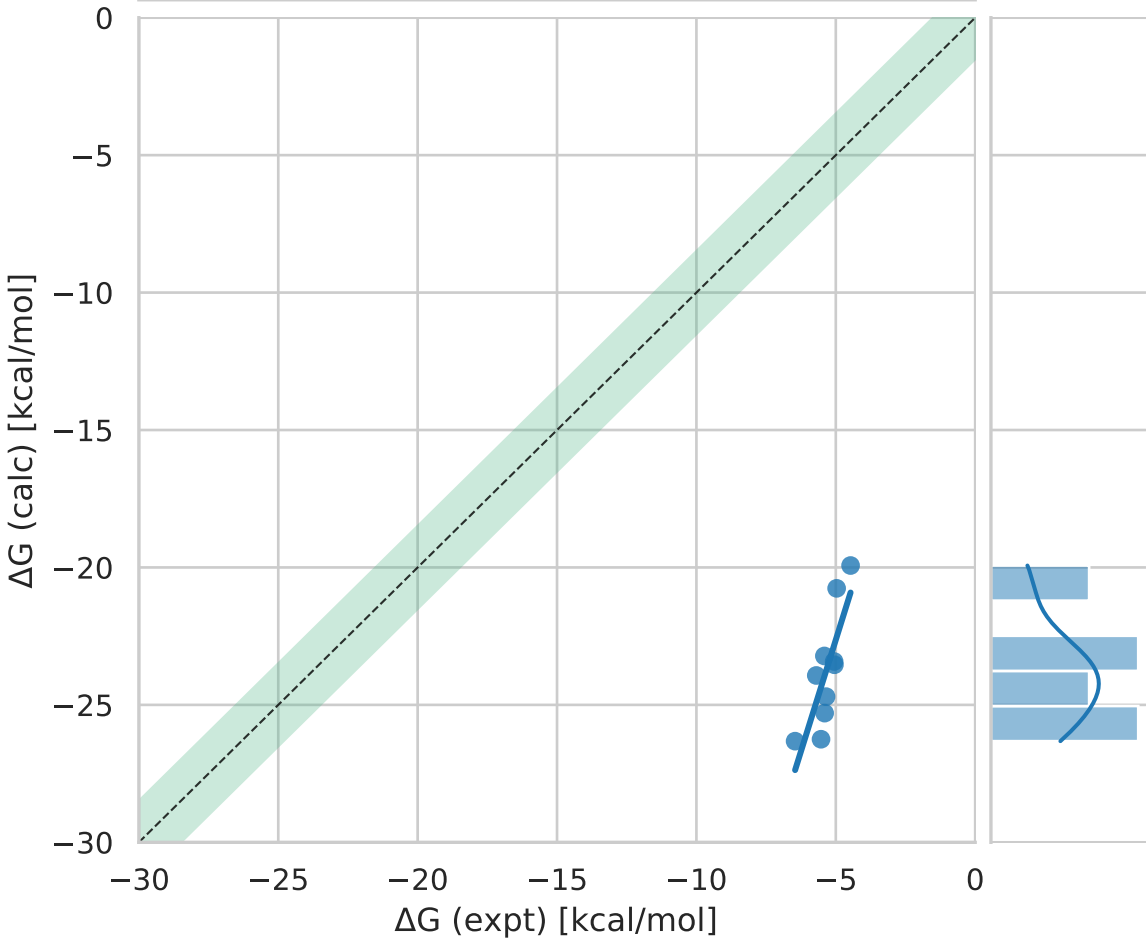

Supplement: d3cp05111k1.zip [file d3cp05111k1.zip]

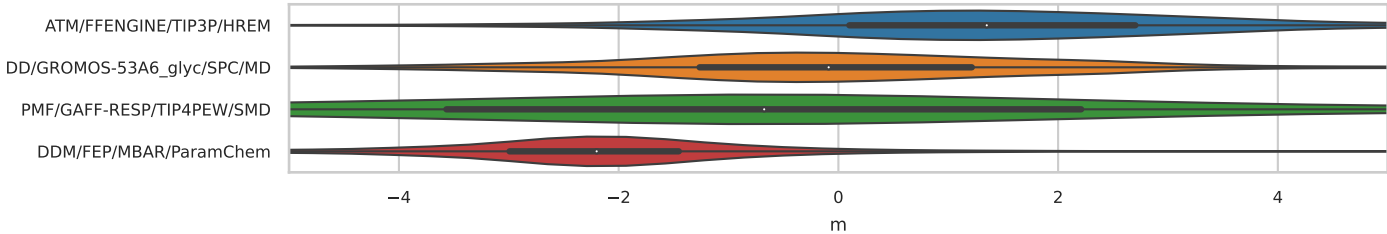

Supplement: d3cp05111k1.zip [file d3cp05111k1.zip]

DDM/FEP/MBAR/ParamChem - bCD (16)

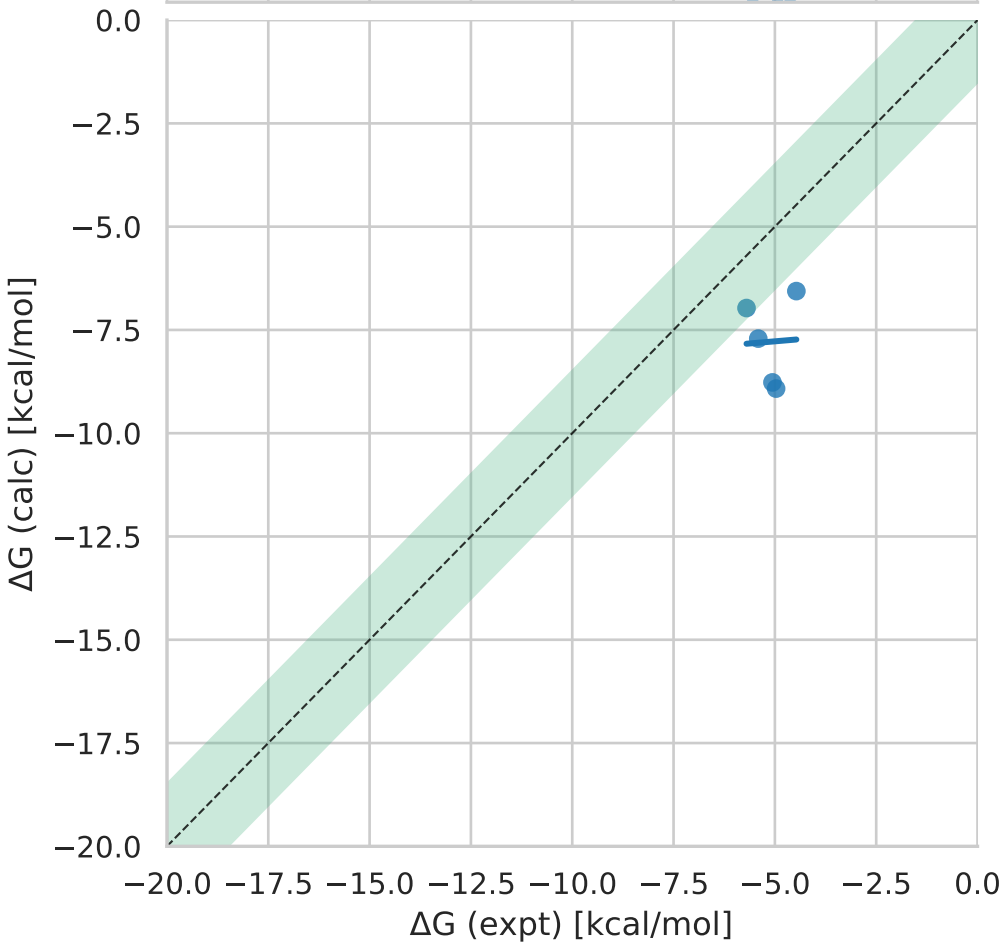

Supplement: d3cp05111k1.zip [file d3cp05111k1.zip]

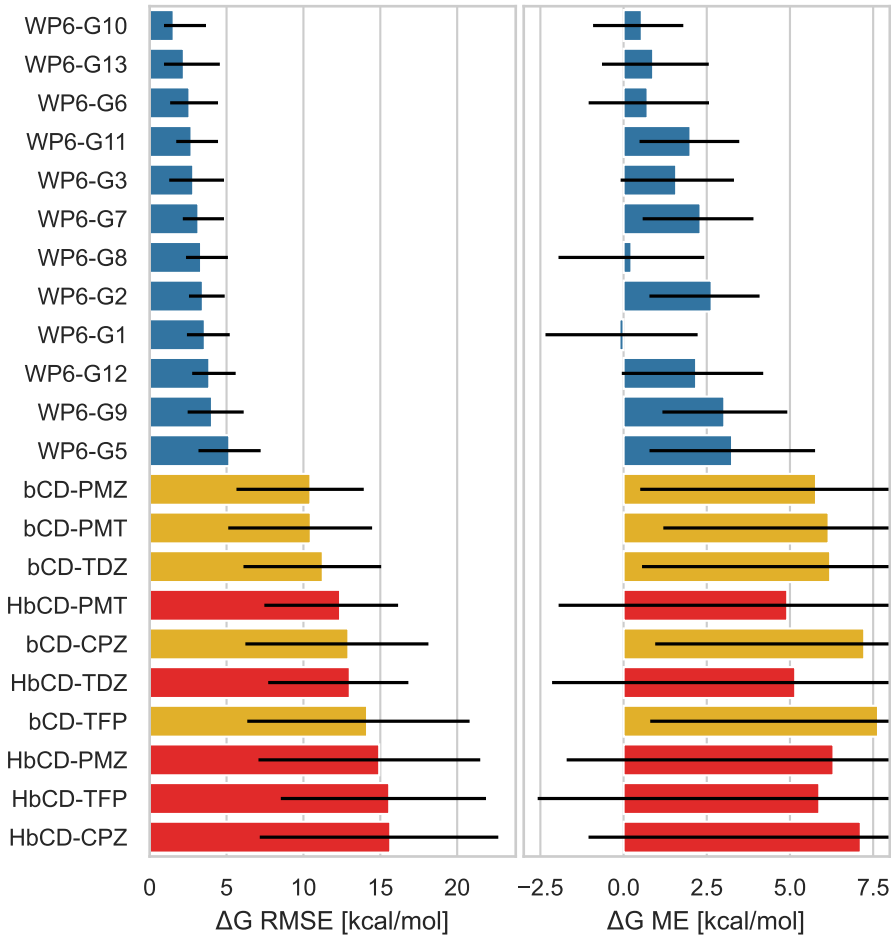

Supplement: d3cp05111k1.zip [file d3cp05111k1.zip]

APR/GAFF2/TIP3P/MD-US/MBAR - bCD (21)

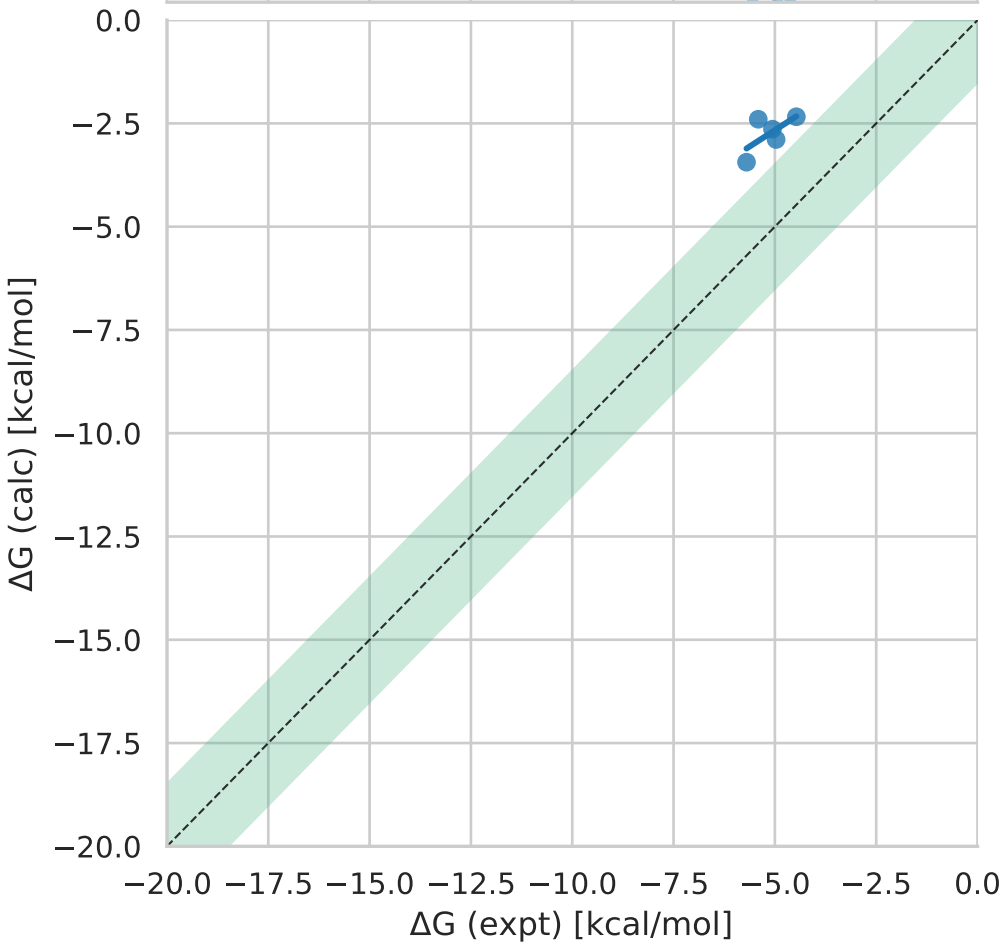

Supplement: d3cp05111k1.zip [file d3cp05111k1.zip]

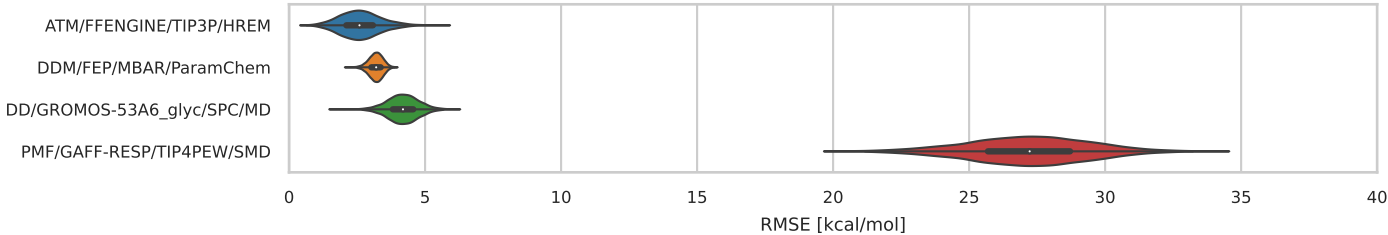

Supplement: d3cp05111k1.zip [file d3cp05111k1.zip]

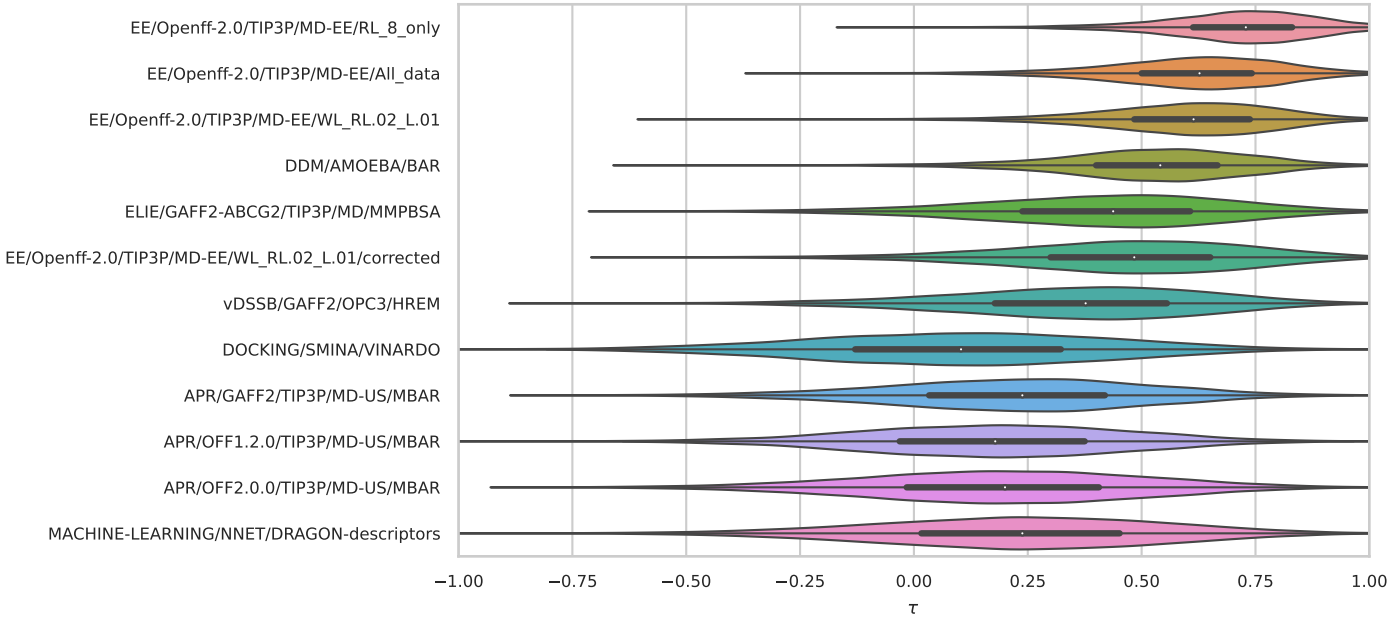

Supplement: d3cp05111k1.zip [file d3cp05111k1.zip]

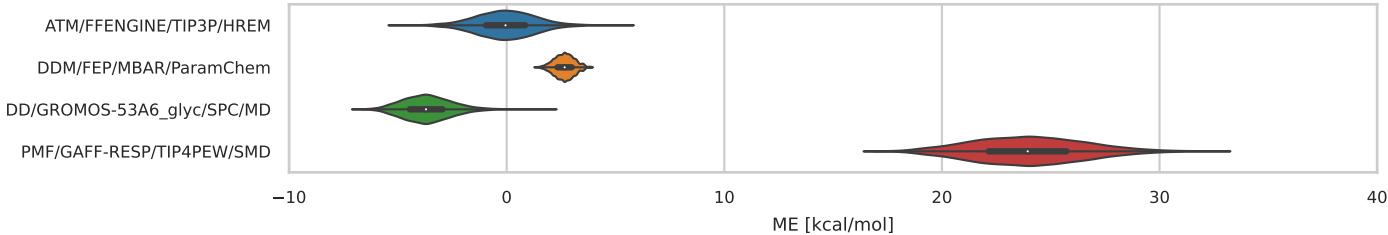

Supplement: d3cp05111k1.zip [file d3cp05111k1.zip]

# MACHINE-LEARNING/NNET/DRAGON-descriptors - WP6 (3)

$\Delta H$  (calc) [kcal/mol]

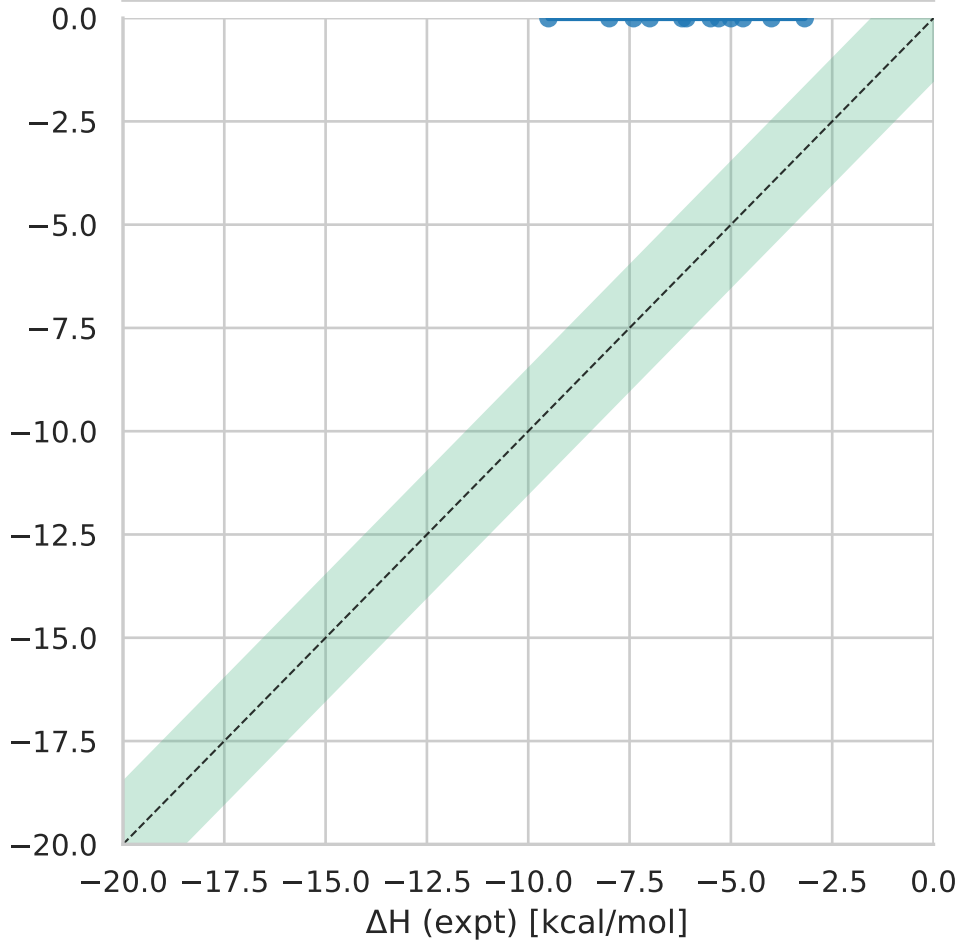

Supplement: d3cp05111k1.zip [file d3cp05111k1.zip]

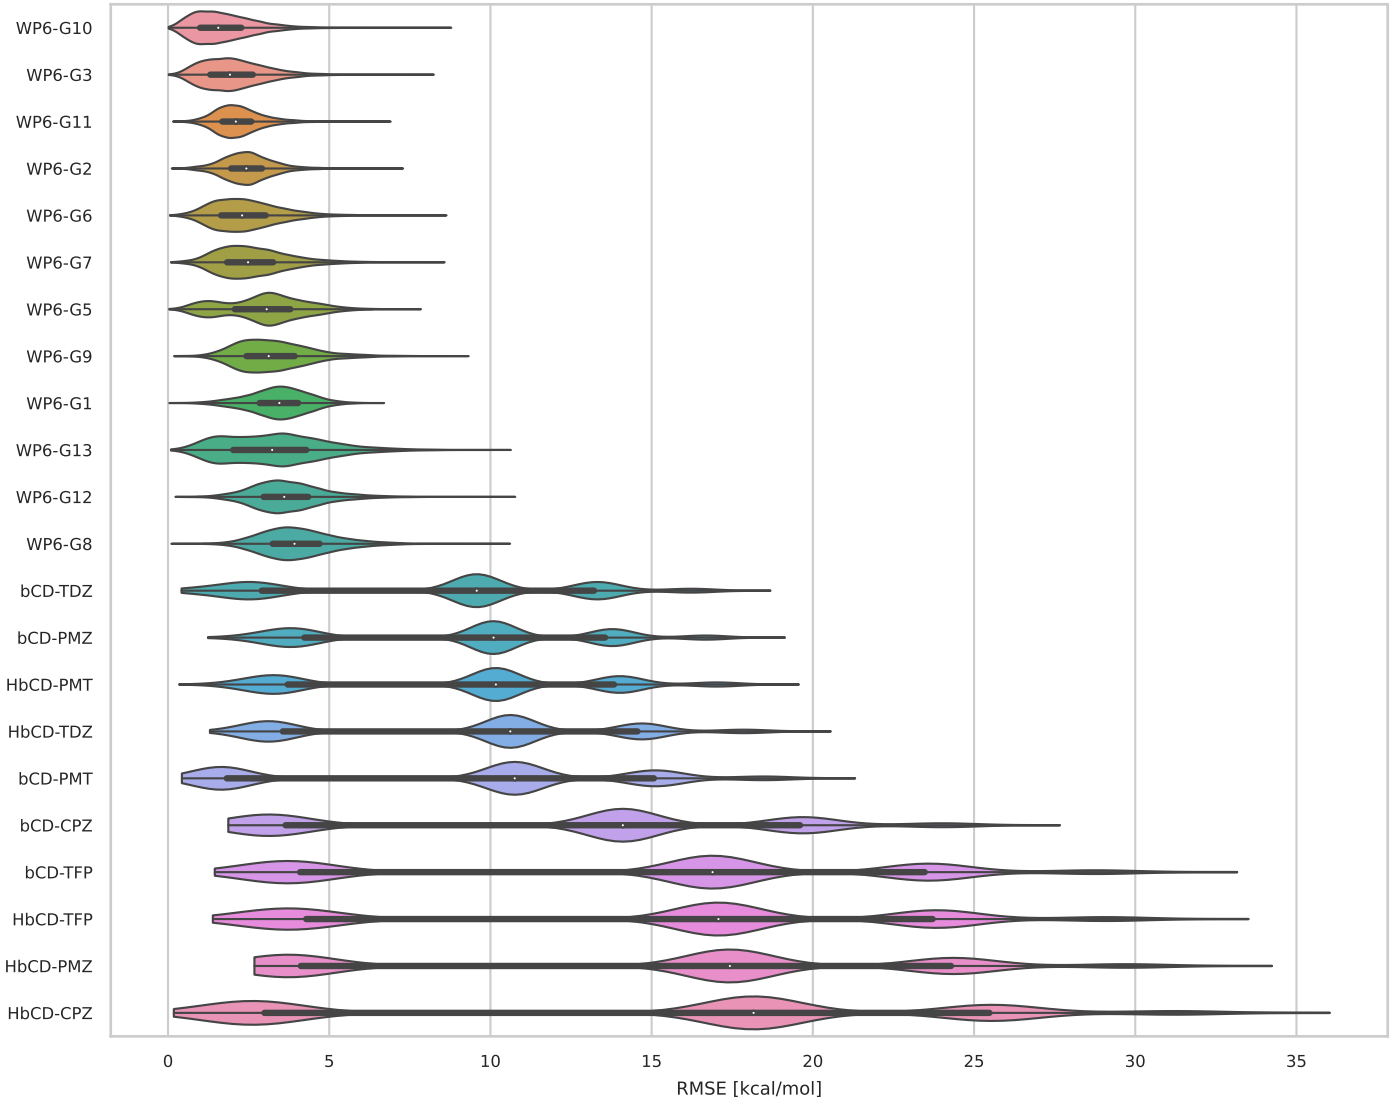

Supplement: d3cp05111k1.zip [file d3cp05111k1.zip]

DDM/FEP/MBAR/ParamChem - HbCD (16)

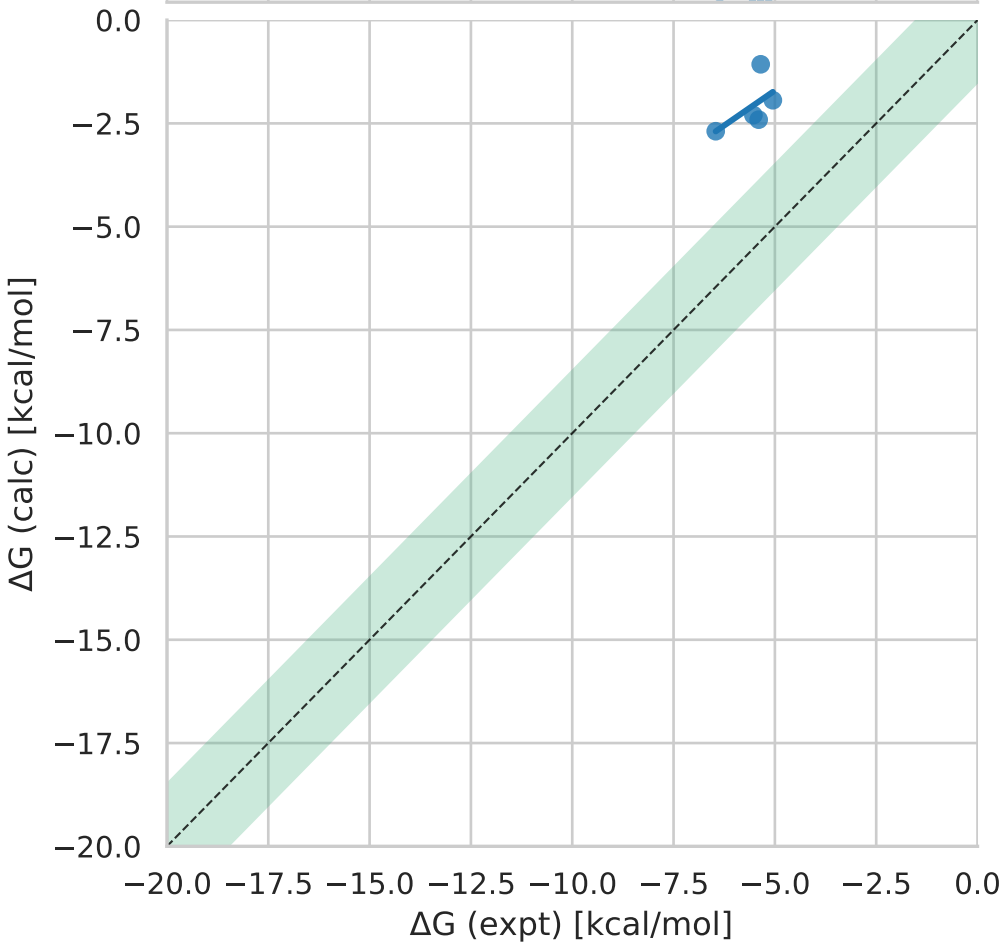

Supplement: d3cp05111k1.zip [file d3cp05111k1.zip]

# vDSSB/GAFF2/OPC3/HREM - WP6 (2)

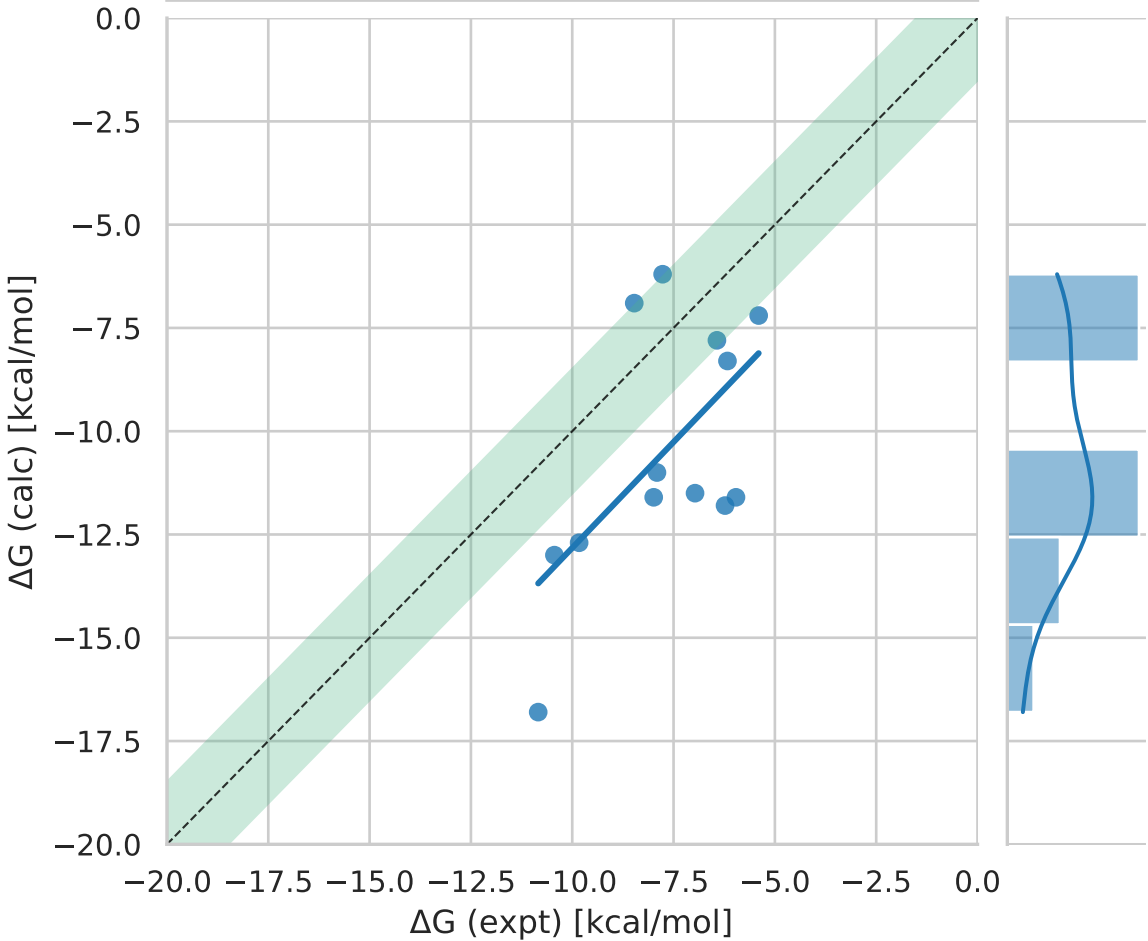

Supplement: d3cp05111k1.zip [file d3cp05111k1.zip]

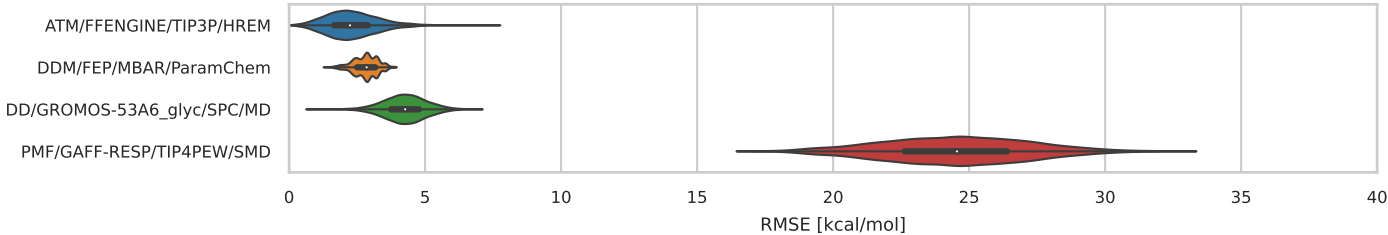

Supplement: d3cp05111k1.zip [file d3cp05111k1.zip]

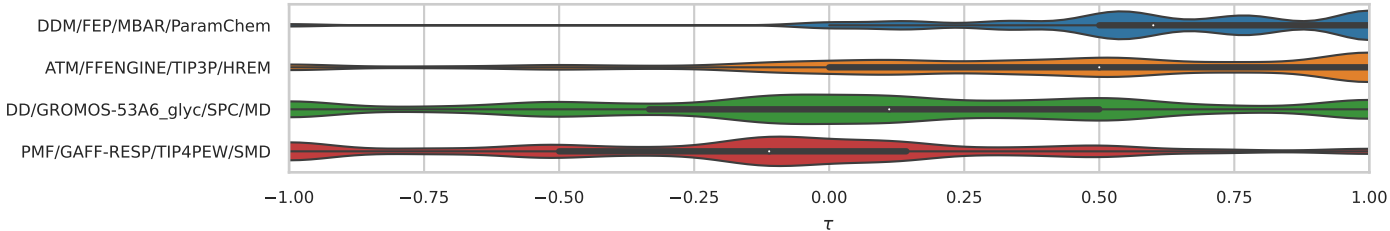

Supplement: d3cp05111k1.zip [file d3cp05111k1.zip]

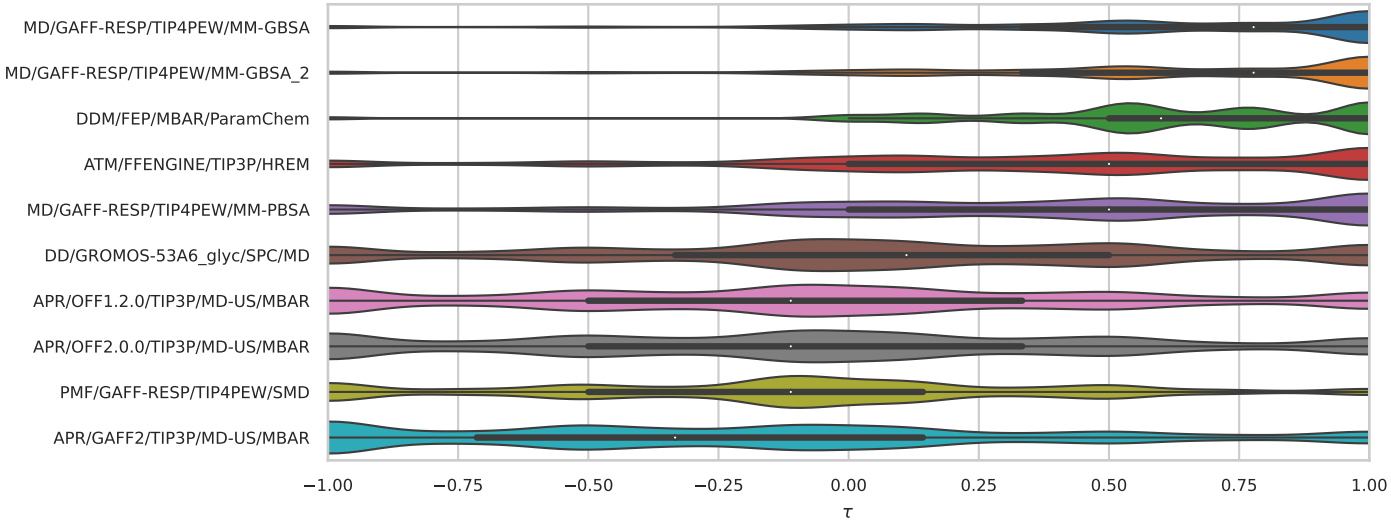

Supplement: d3cp05111k1.zip [file d3cp05111k1.zip]

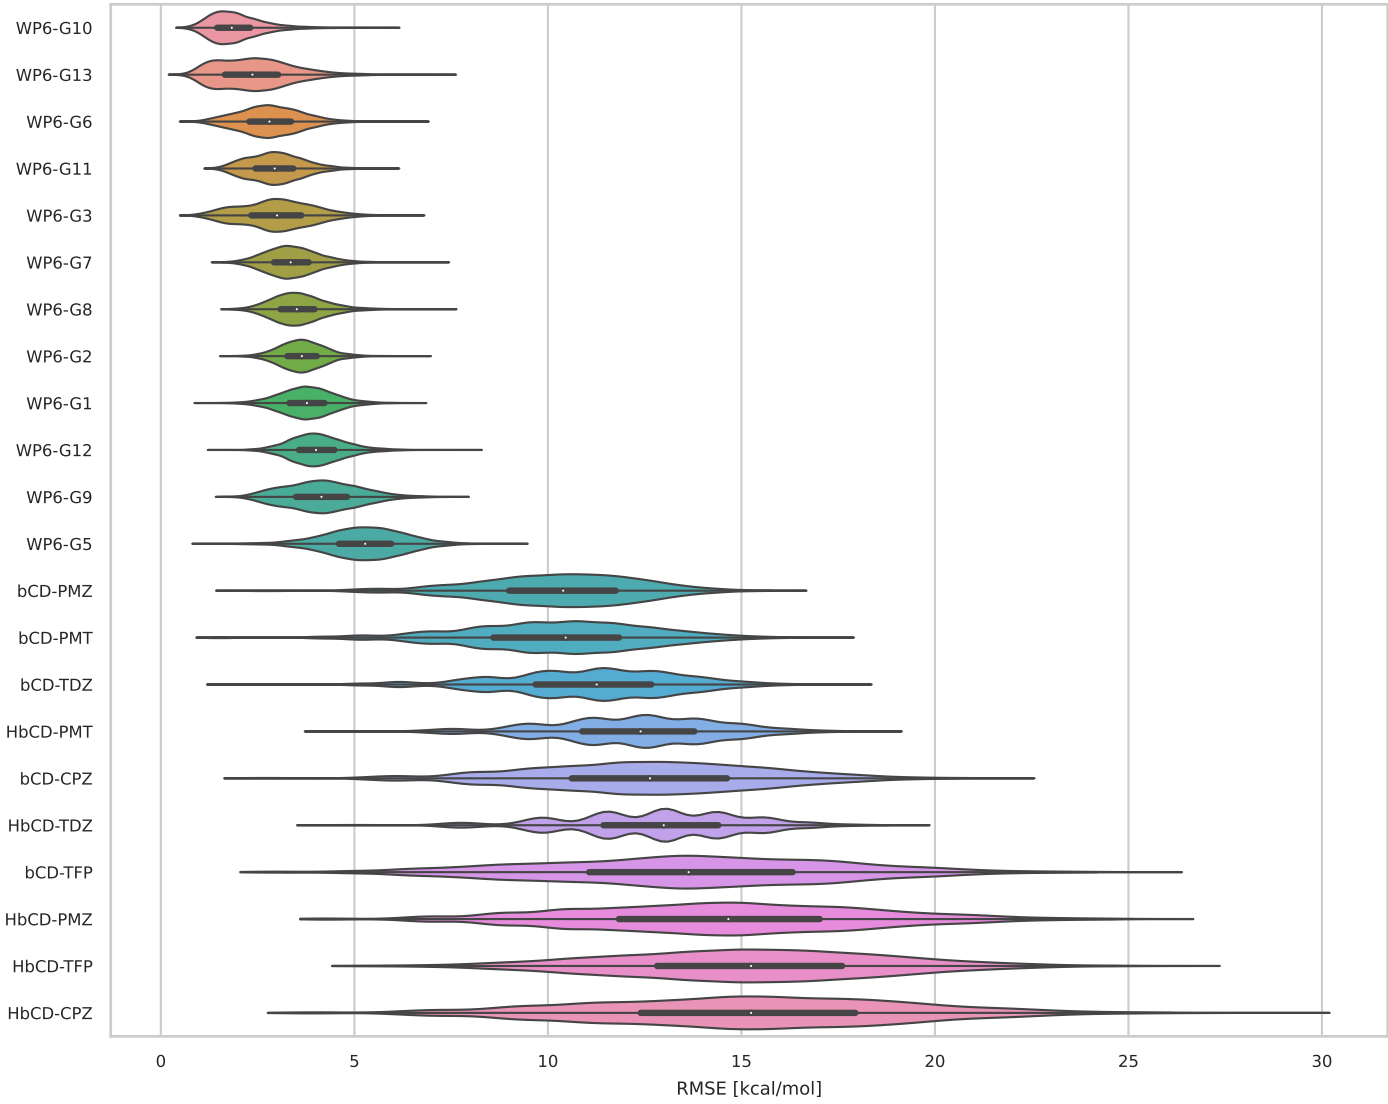

Supplement: d3cp05111k1.zip [file d3cp05111k1.zip]

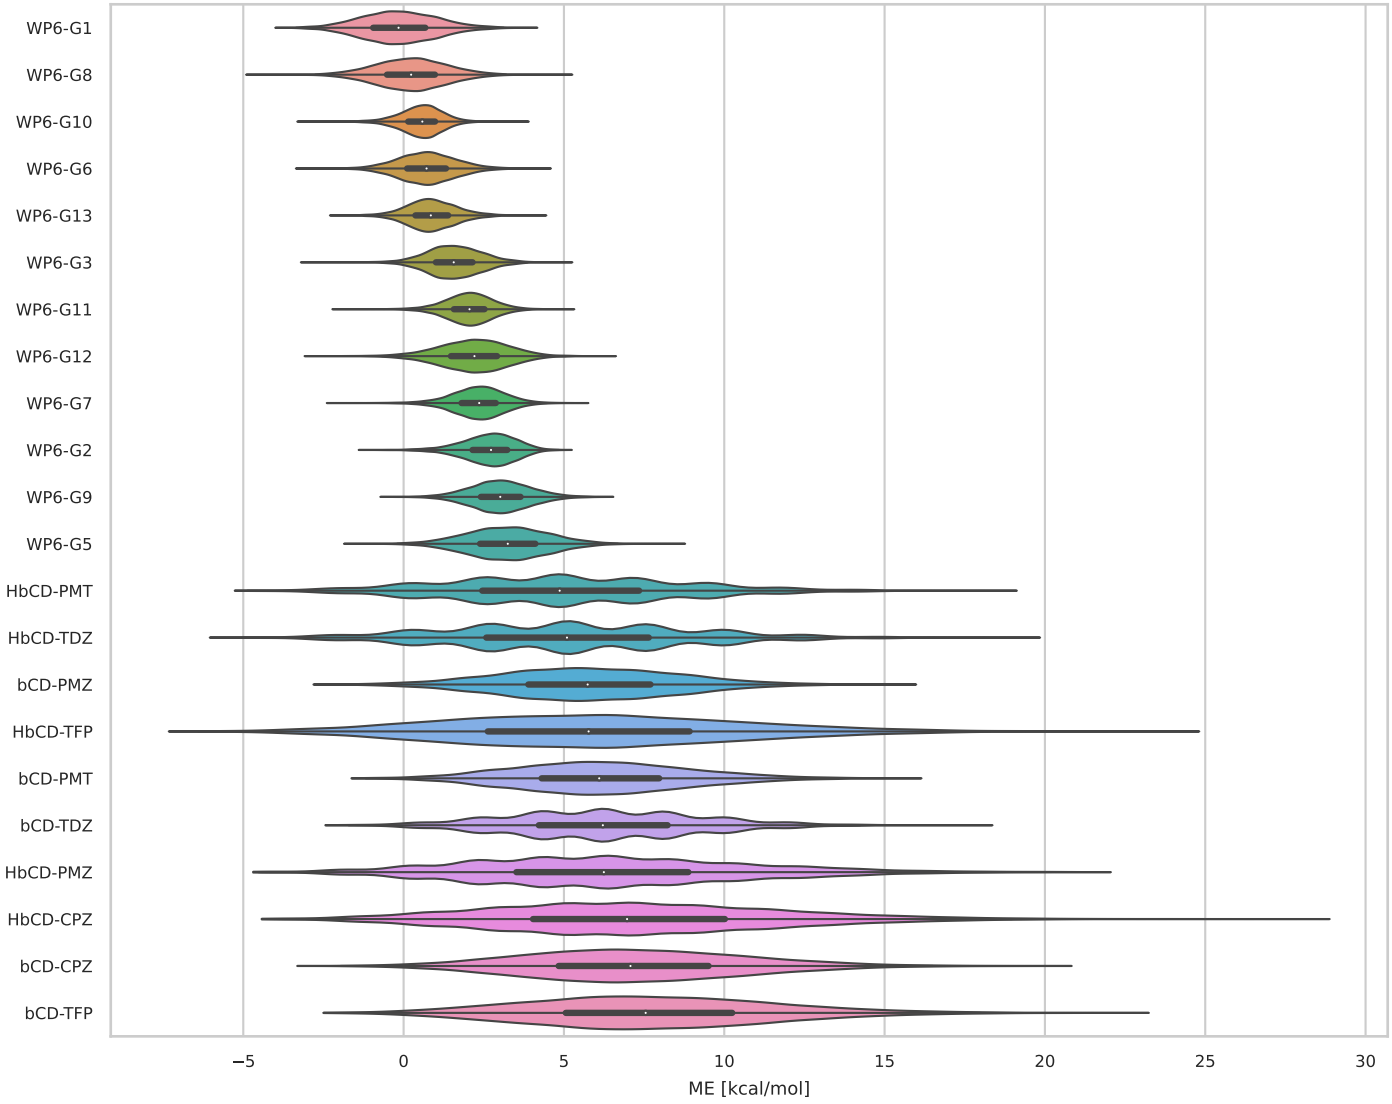

Supplement: d3cp05111k1.zip [file d3cp05111k1.zip]

EE/Openff-2.0/TIP3P/MD-EE/All data - WP6 (5)

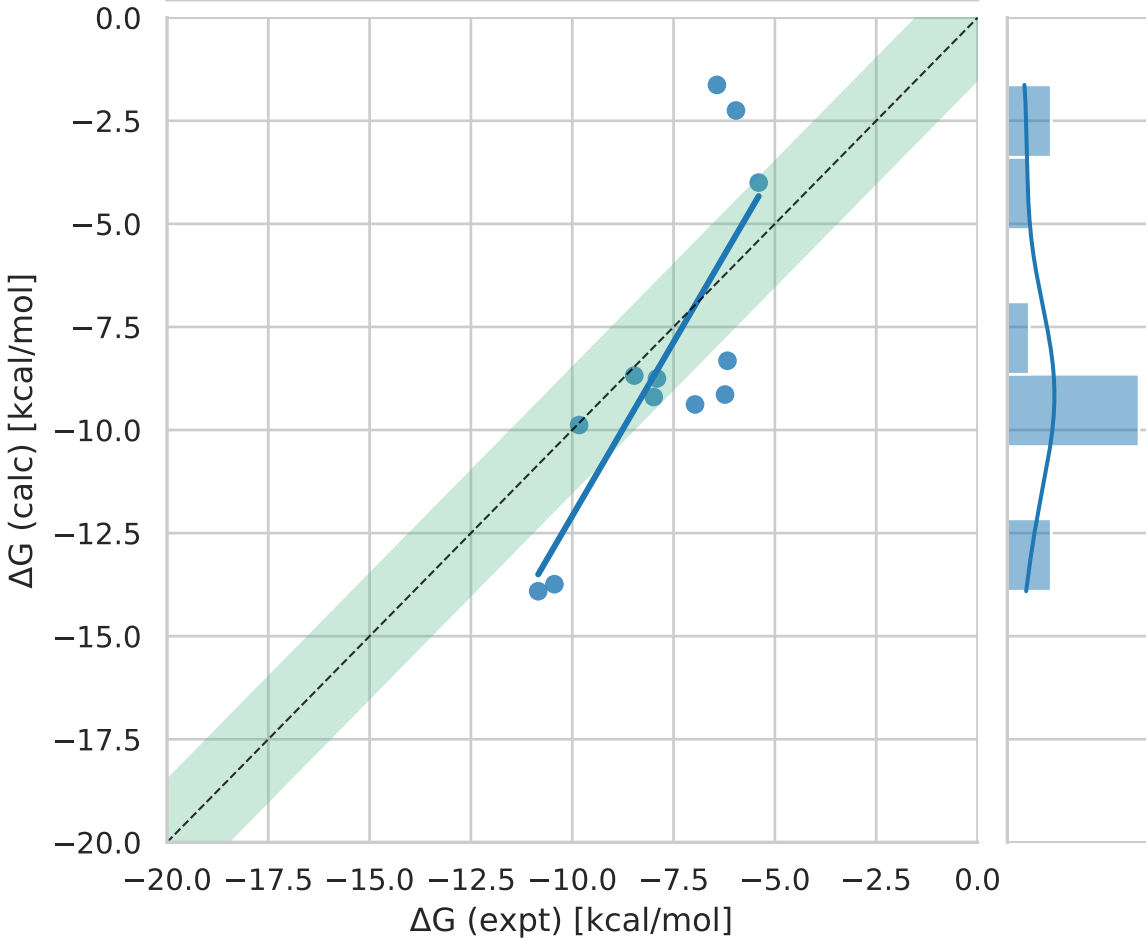

Supplement: d3cp05111k1.zip [file d3cp05111k1.zip]

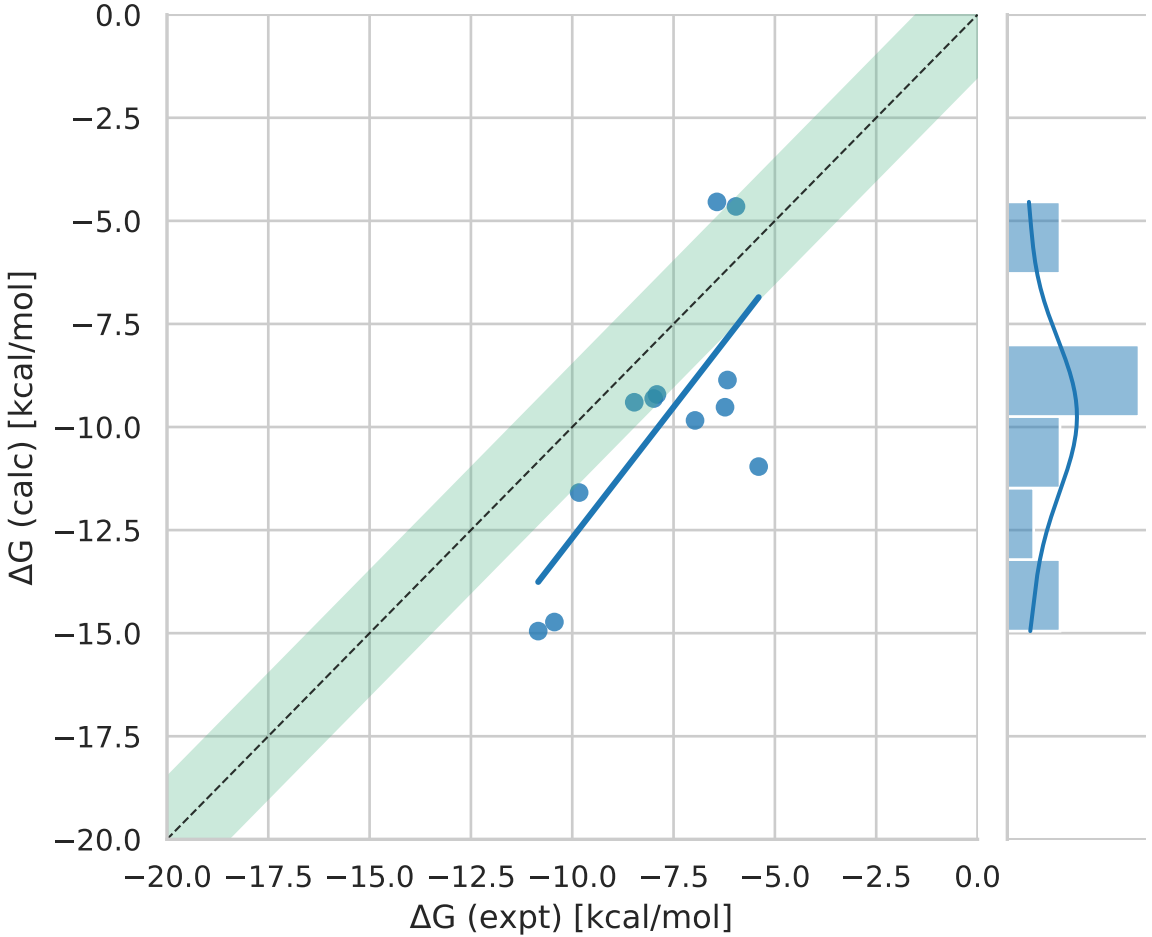

Supplement: d3cp05111k1.zip [file d3cp05111k1.zip]

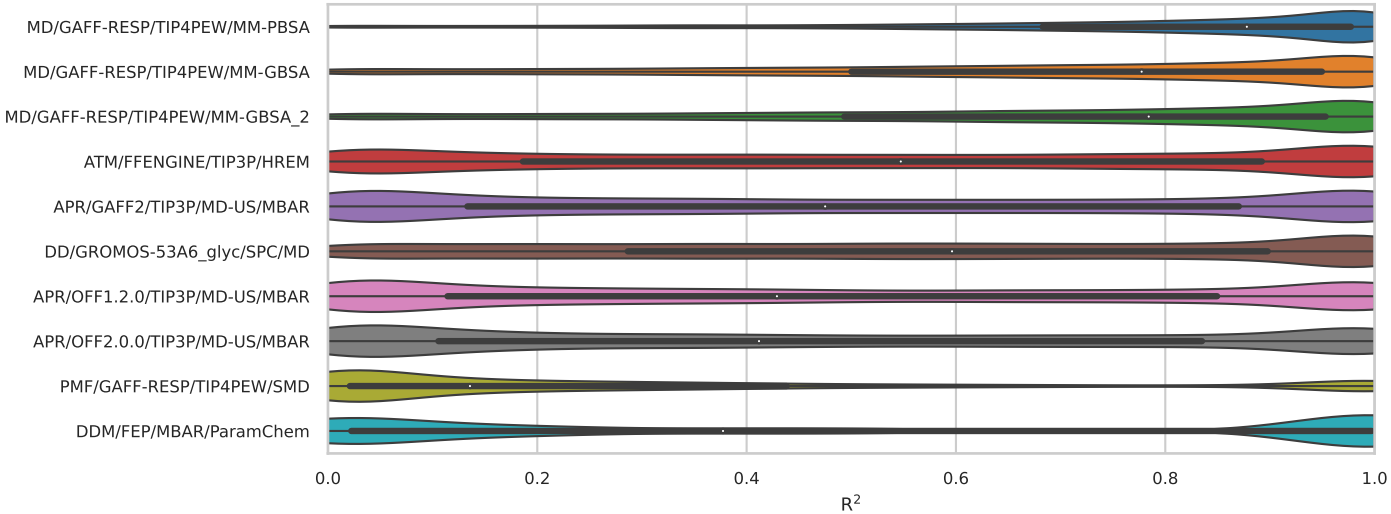

Supplement: d3cp05111k1.zip [file d3cp05111k1.zip]

## MD/GAFF-RESP/TIP4PEW/MM-GBSA\_2 - HbCD (15)

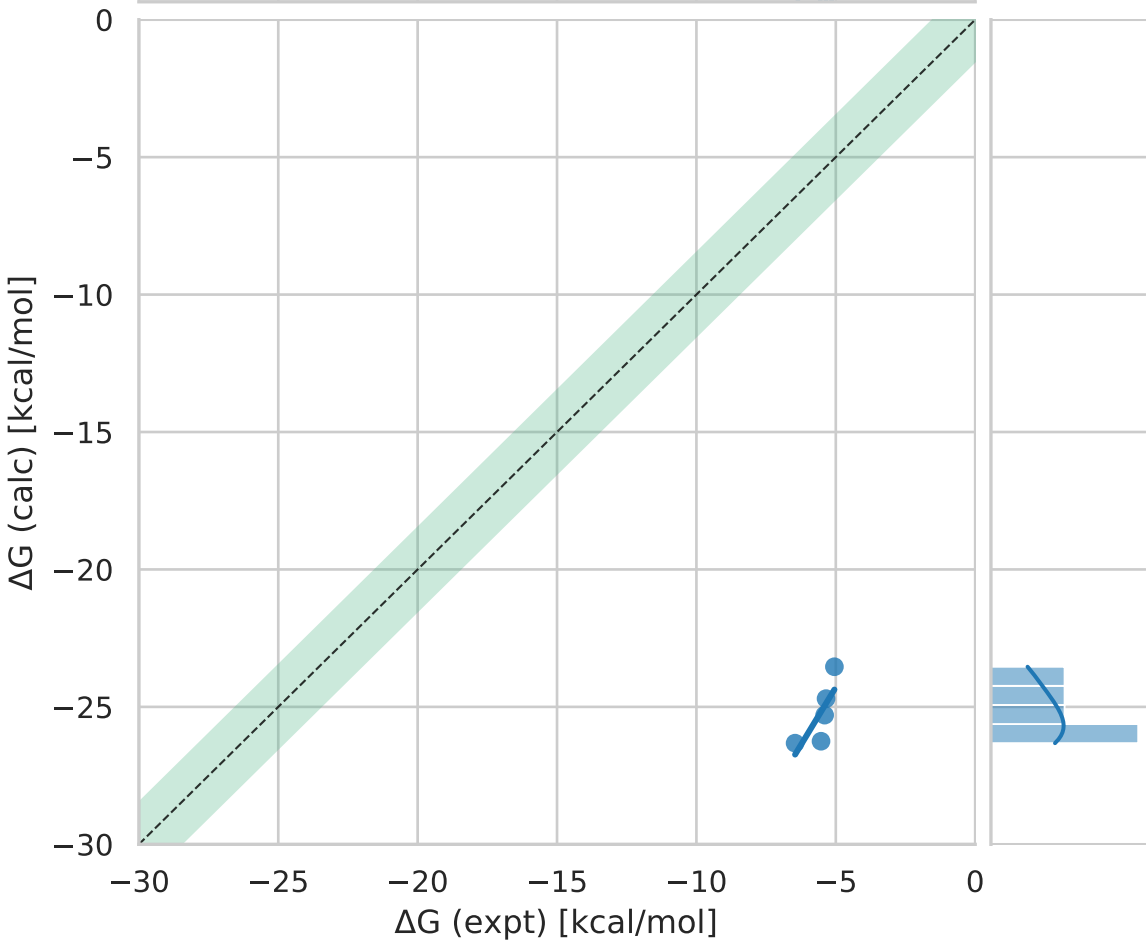

Supplement: d3cp05111k1.zip [file d3cp05111k1.zip]

APR/OFF1.2.0/TIP3P/MD-US/MBAR - CD (22)

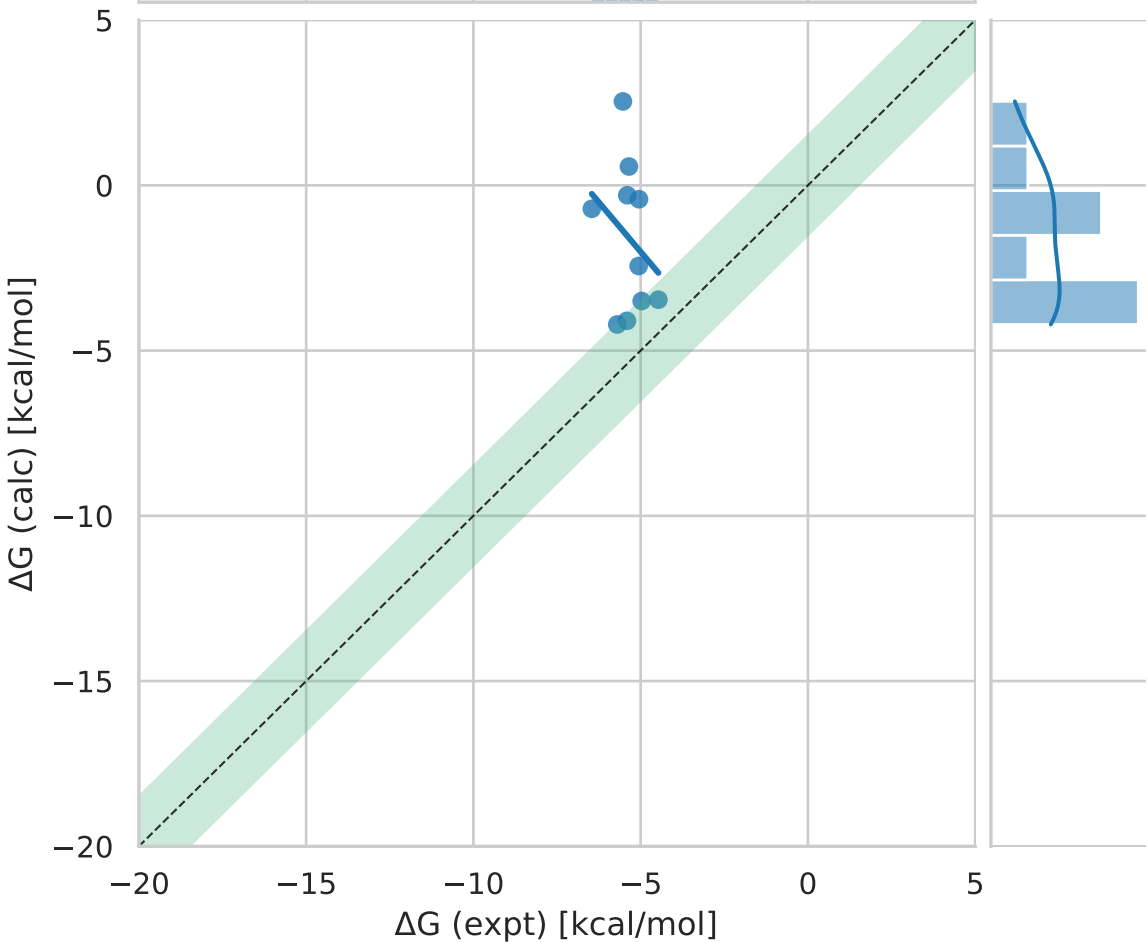

Supplement: d3cp05111k1.zip [file d3cp05111k1.zip]

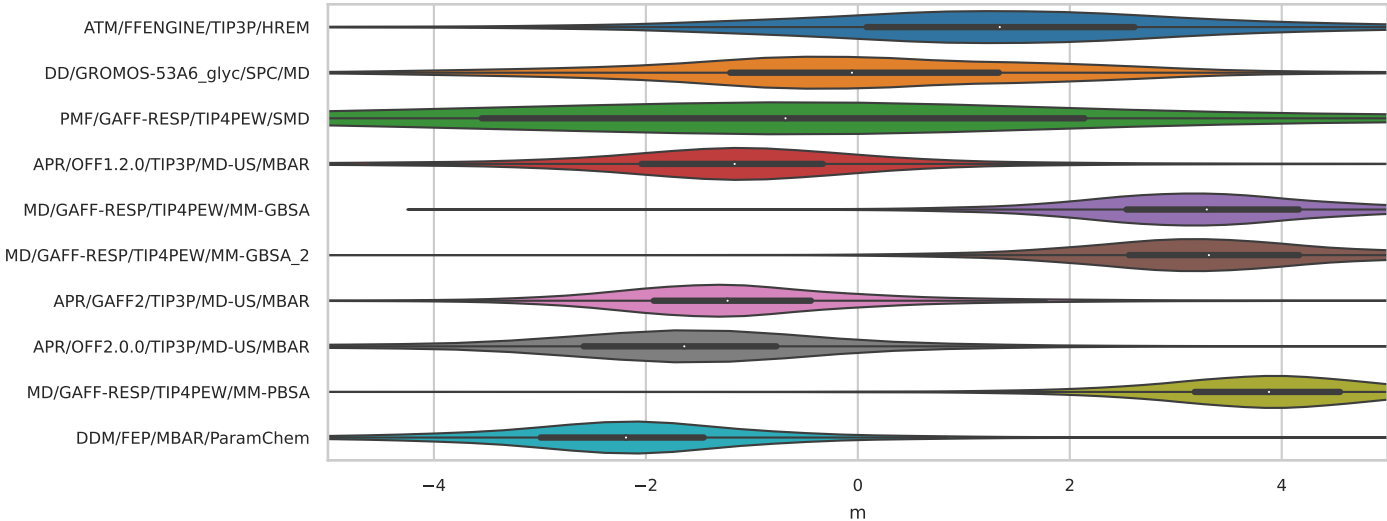

Supplement: d3cp05111k1.zip [file d3cp05111k1.zip]

# APR/OFF1.2.0/TIP3P/MD-US/MBAR - WP6 (19)

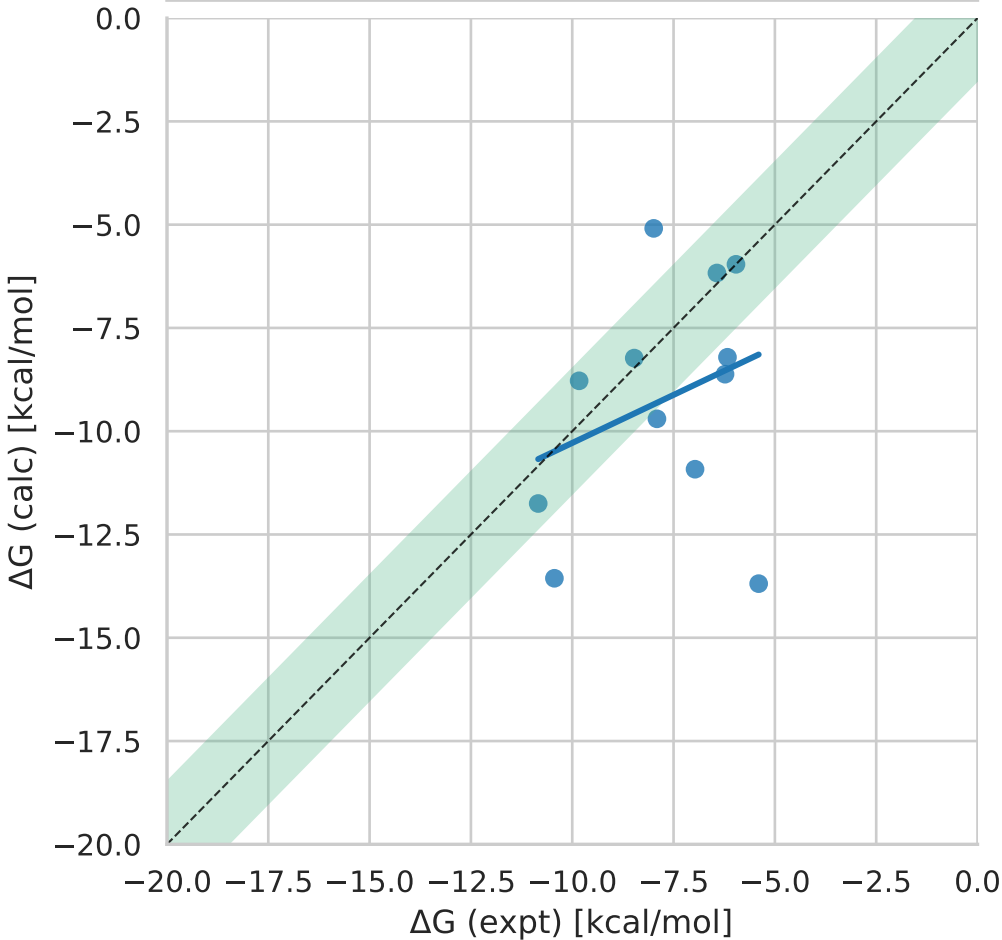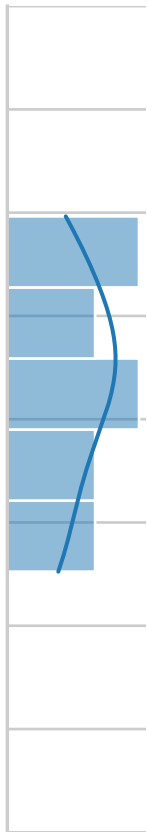

Supplement: d3cp05111k1.zip [file d3cp05111k1.zip]

## DOCKING/SMINA/VINARDO - WP6 (1)

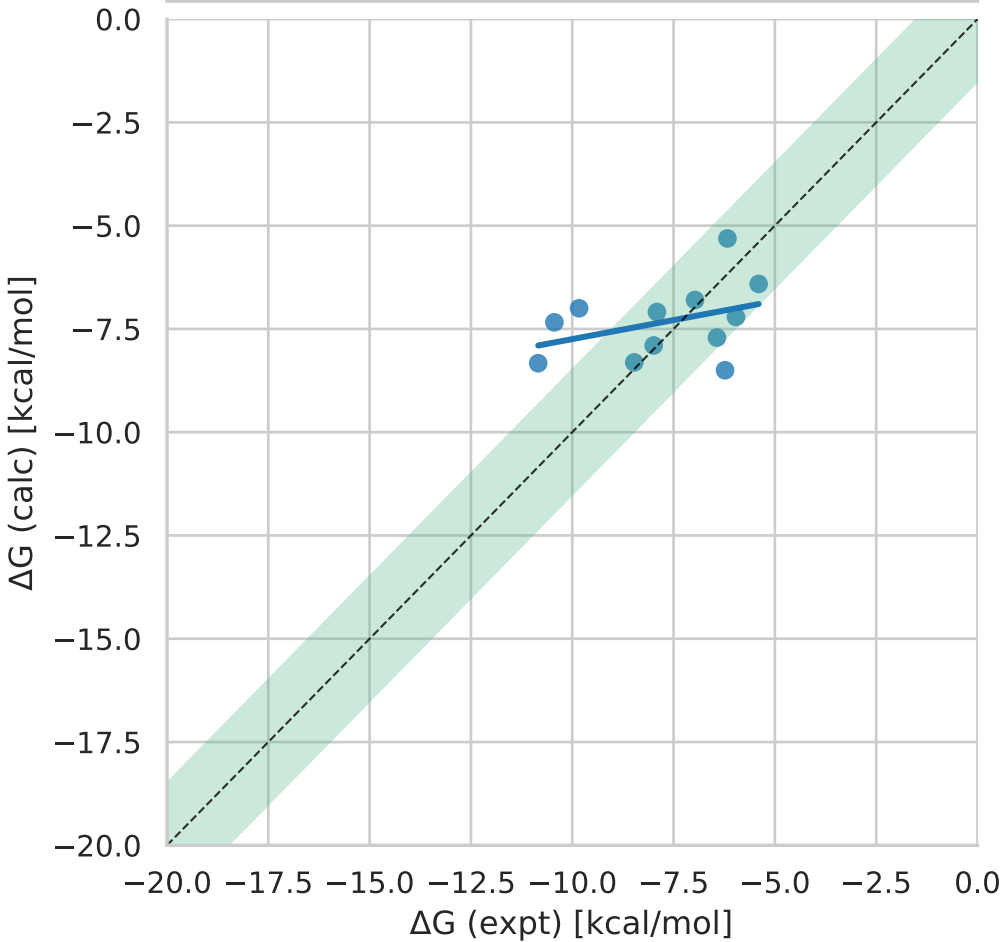

Supplement: d3cp05111k1.zip [file d3cp05111k1.zip]

# APR/GAFF2/TIP3P/MD-US/MBAR - WP6 (18)

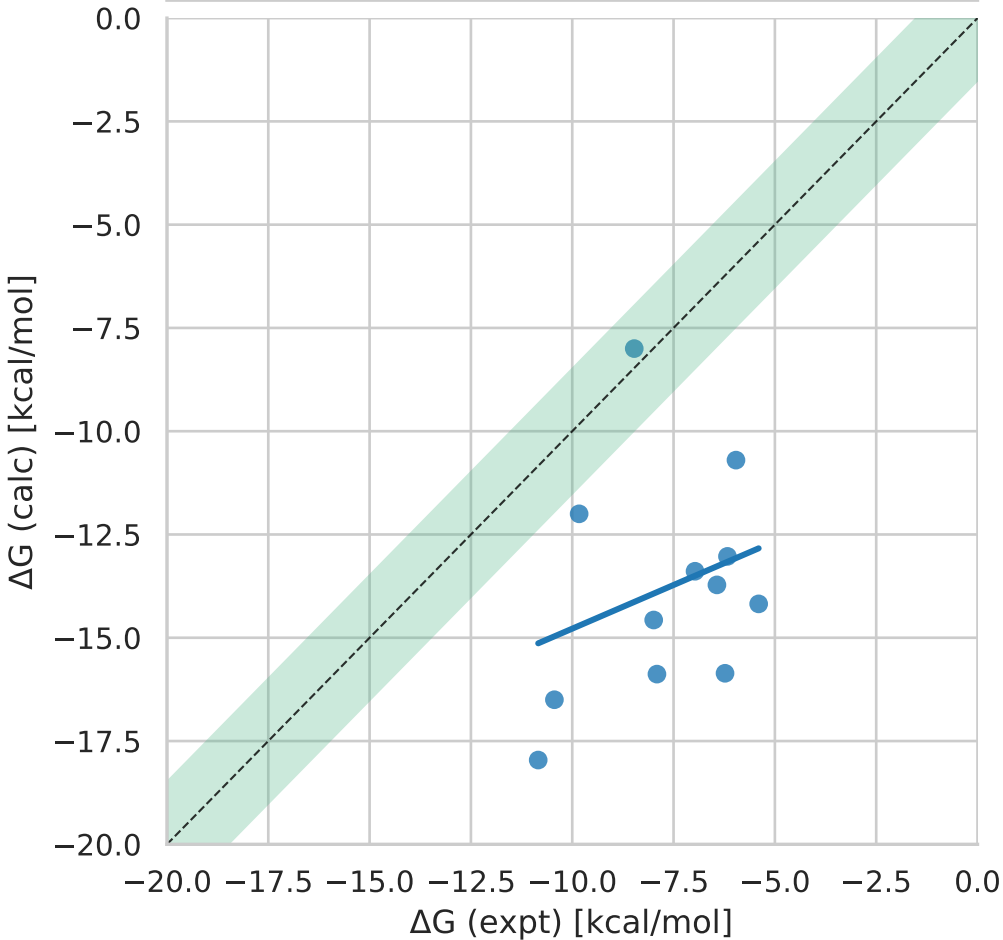

Supplement: d3cp05111k1.zip [file d3cp05111k1.zip]

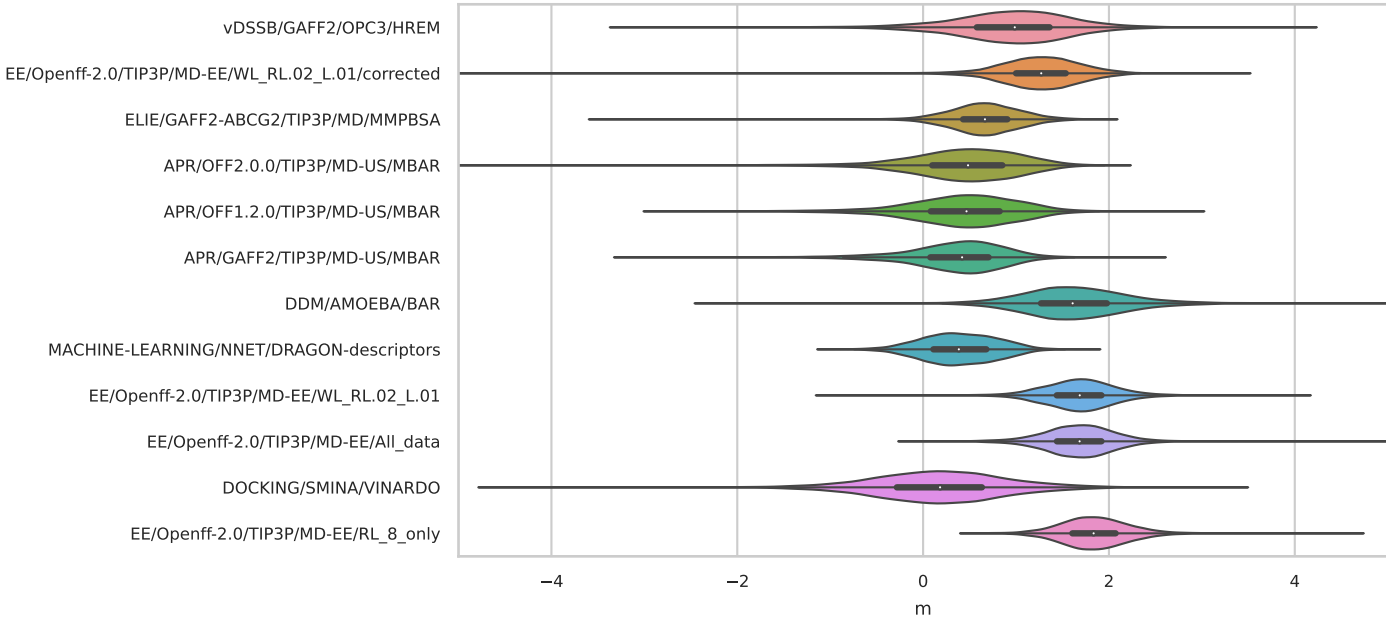

Supplement: d3cp05111k1.zip [file d3cp05111k1.zip]

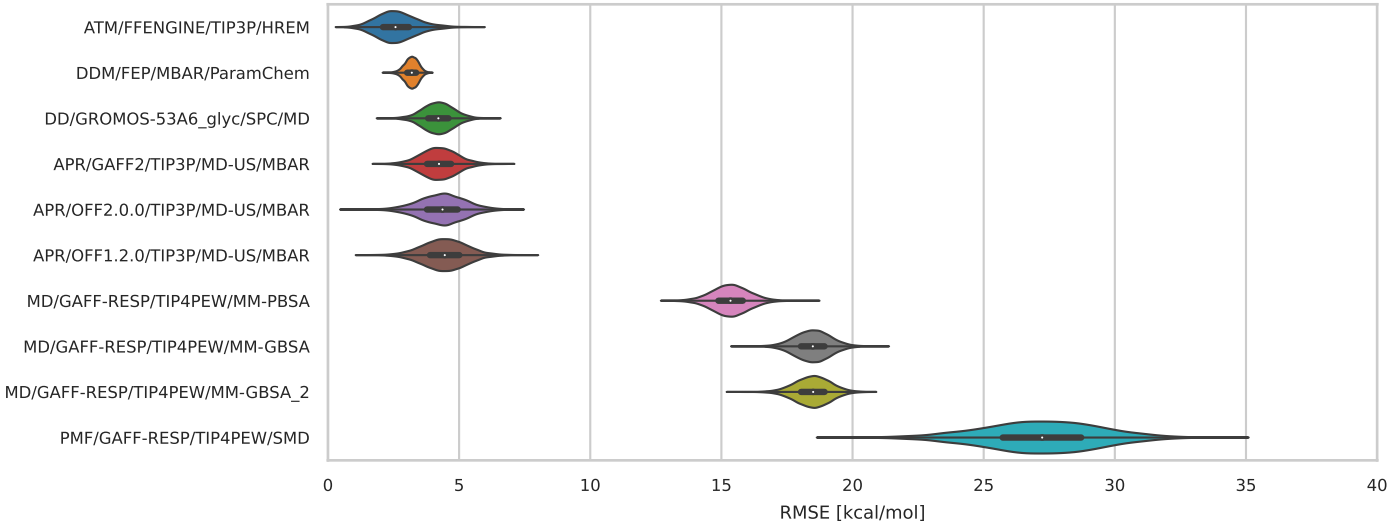

Supplement: d3cp05111k1.zip [file d3cp05111k1.zip]

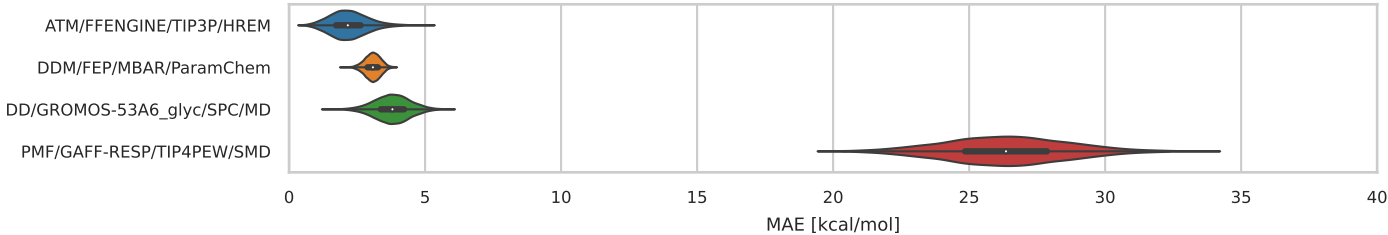

Supplement: d3cp05111k1.zip [file d3cp05111k1.zip]

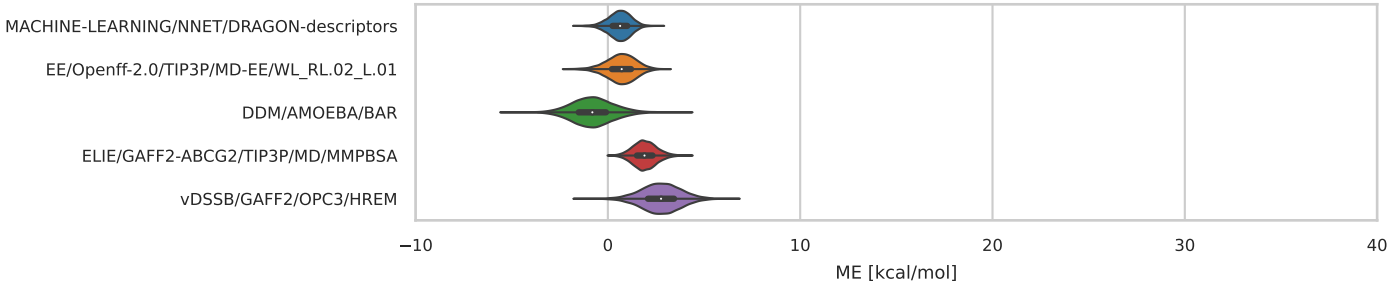

Supplement: d3cp05111k1.zip [file d3cp05111k1.zip]

DDM/FEP/MBAR/ParamChem - HbCD (16)



Supplement: d3cp05111k1.zip [file d3cp05111k1.zip]

# ELIE/GAFF2-ABCG2/TIP3P/MD/MMPBSA - WP6 (8)



Supplement: d3cp05111k1.zip [file d3cp05111k1.zip]

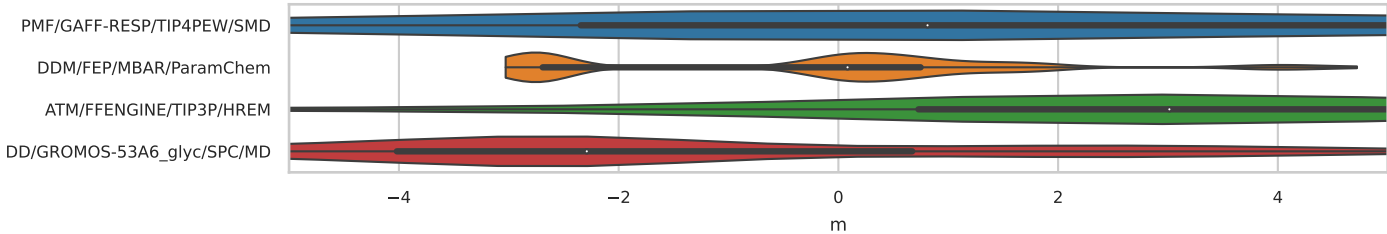

Supplement: d3cp05111k1.zip [file d3cp05111k1.zip]

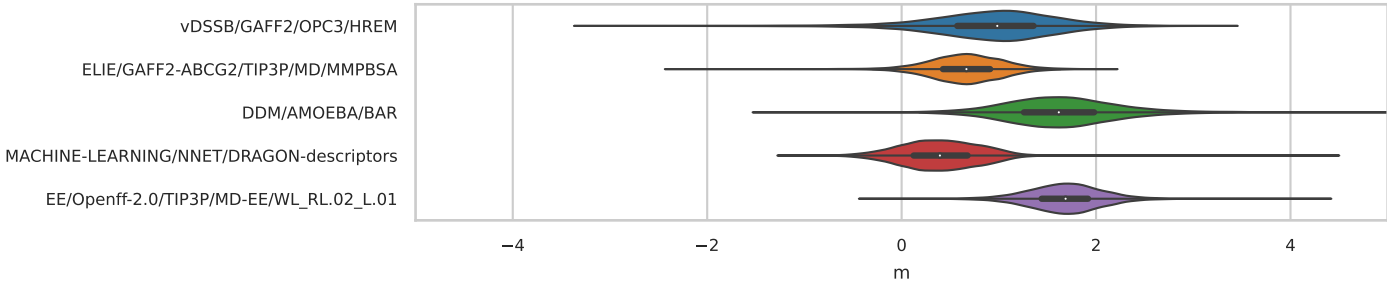

Supplement: d3cp05111k1.zip [file d3cp05111k1.zip]

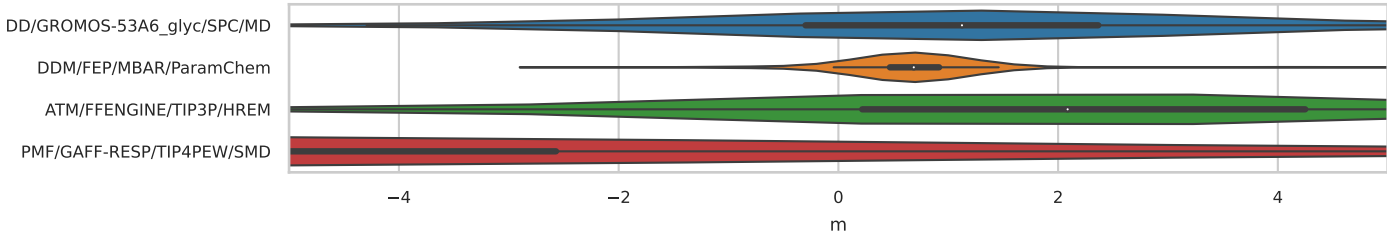

Supplement: d3cp05111k1.zip [file d3cp05111k1.zip]

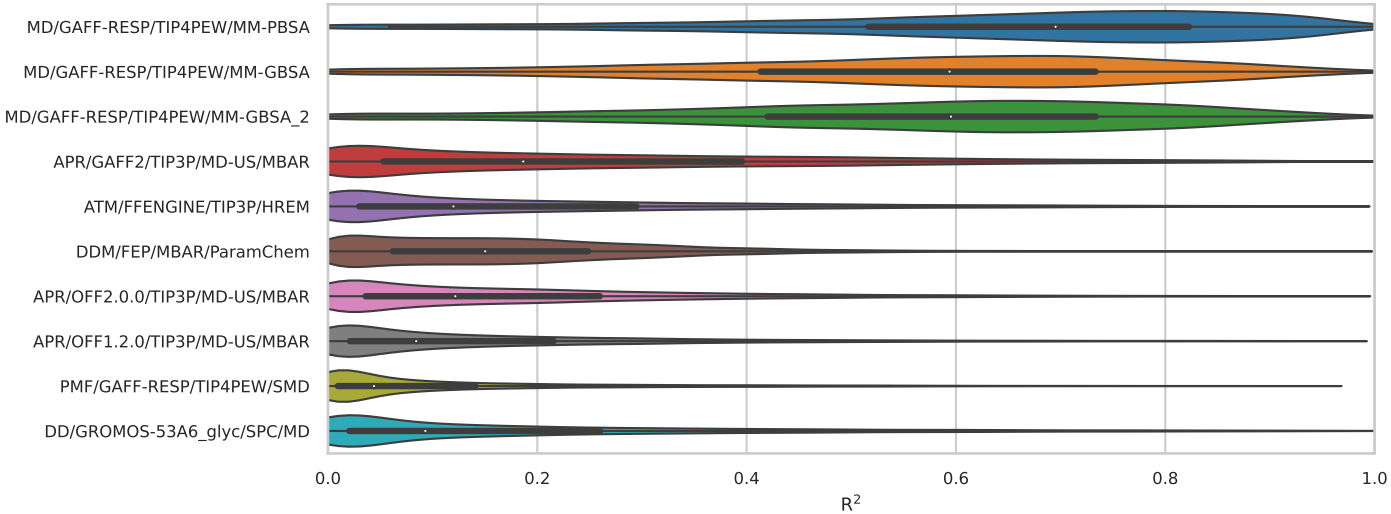

Supplement: d3cp05111k1.zip [file d3cp05111k1.zip]

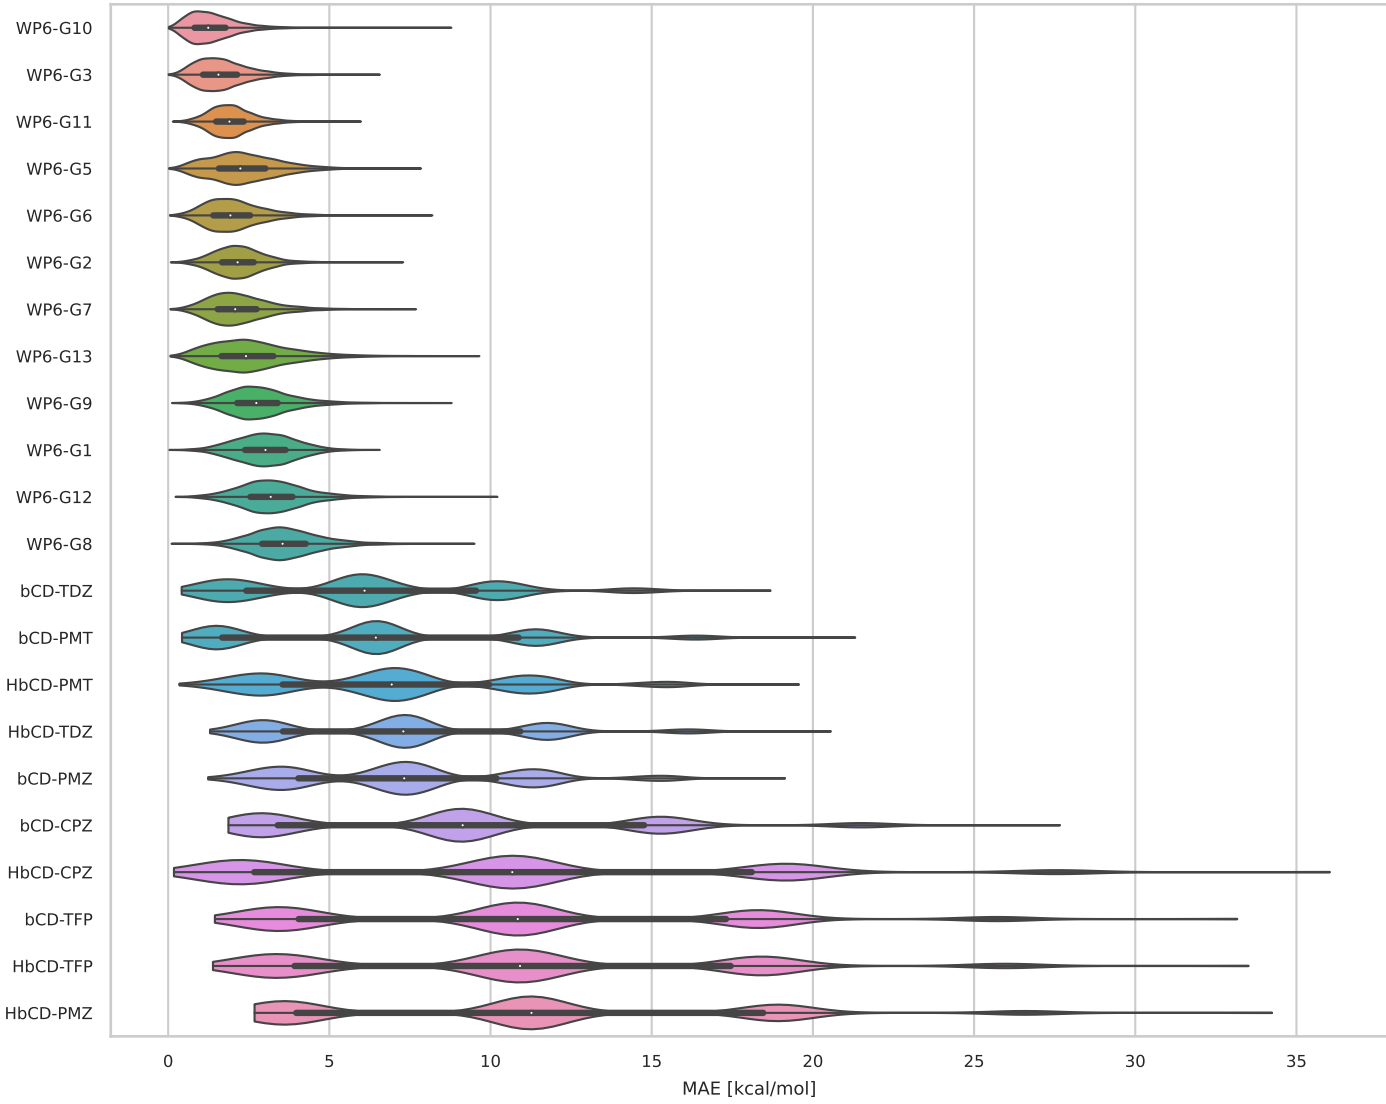

Supplement: d3cp05111k1.zip [file d3cp05111k1.zip]

MD/GAFF-RESP/TIP4PEW/MM-GBSA - HbCD (12)

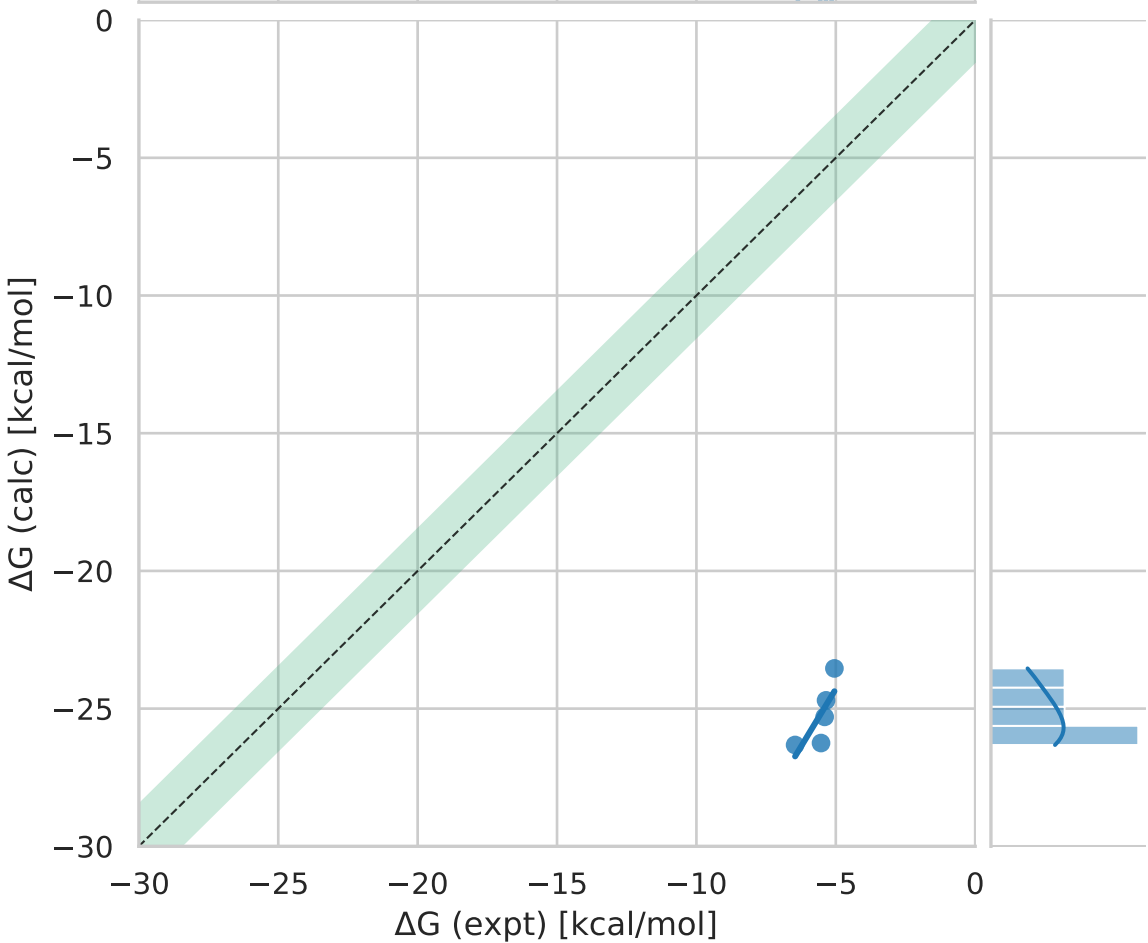

Supplement: d3cp05111k1.zip [file d3cp05111k1.zip]

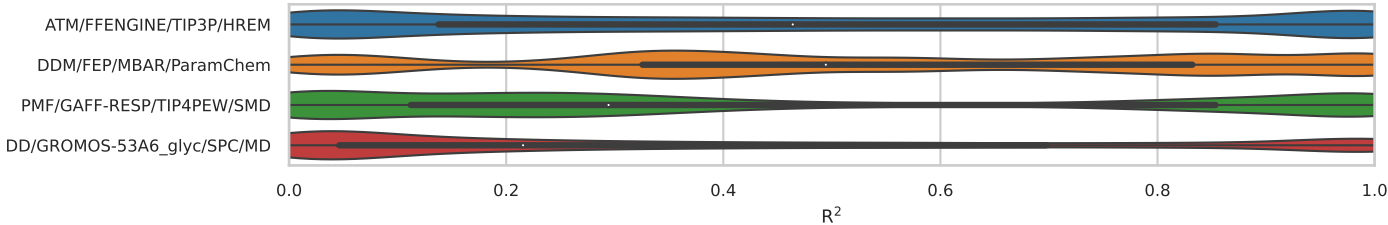

Supplement: d3cp05111k1.zip [file d3cp05111k1.zip]

# APR/OFF2.0.0/TIP3P/MD-US/MBAR - HbCD (23)

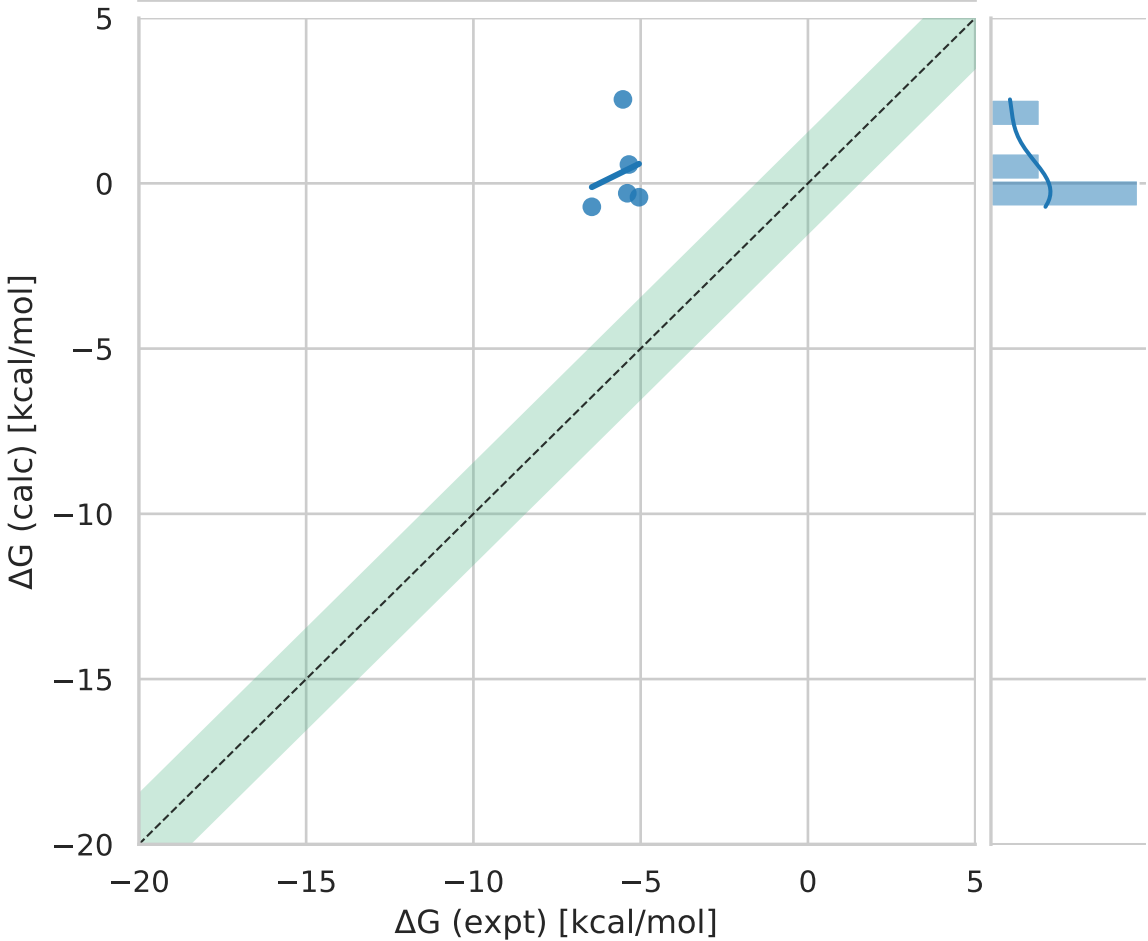

Supplement: d3cp05111k1.zip [file d3cp05111k1.zip]

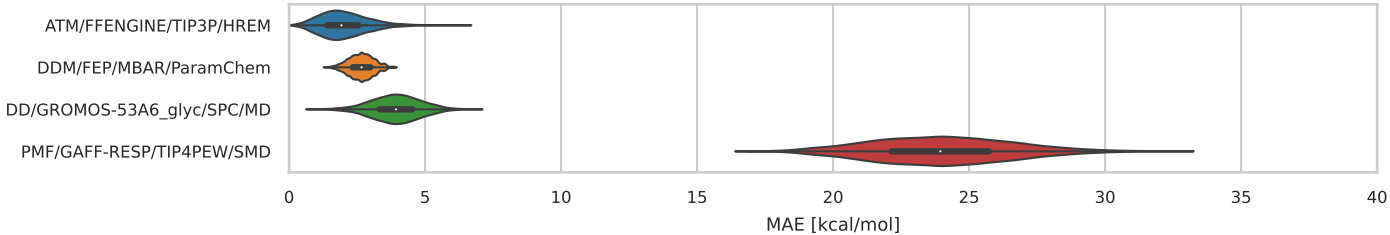

Supplement: d3cp05111k1.zip [file d3cp05111k1.zip]

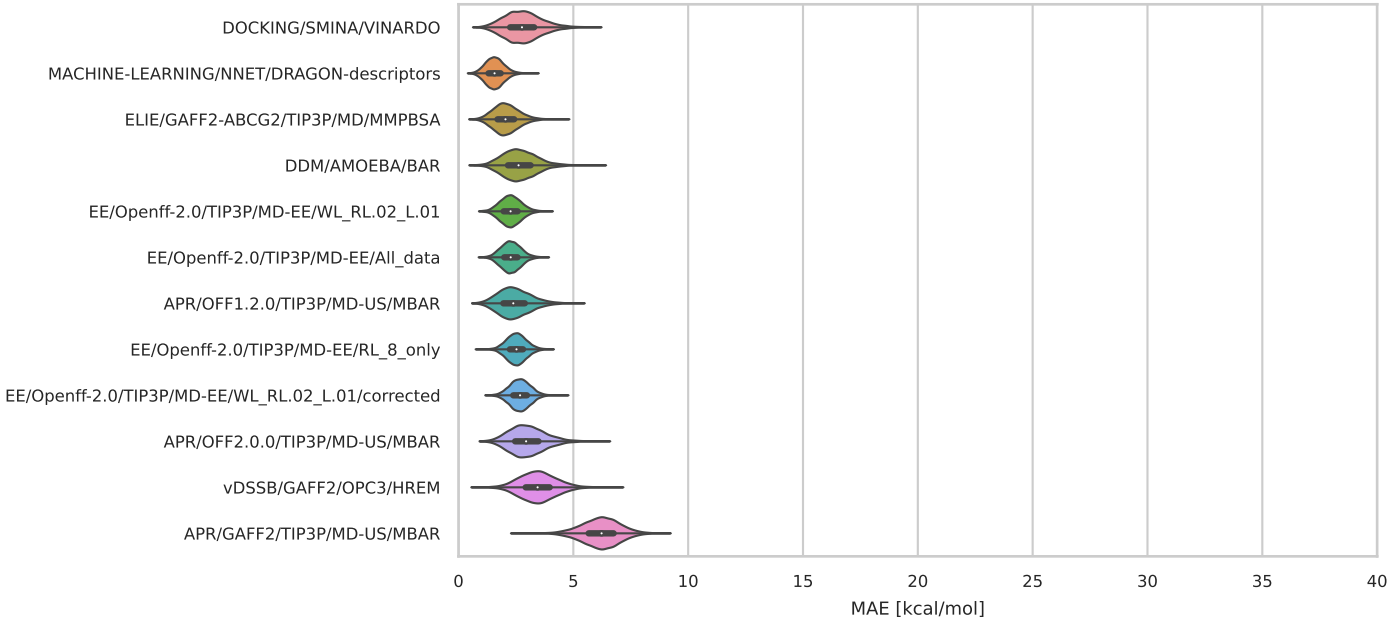

Supplement: d3cp05111k1.zip [file d3cp05111k1.zip]

# MD/GAFF-RESP/TIP4PEW/MM-PBSA - CD (13)

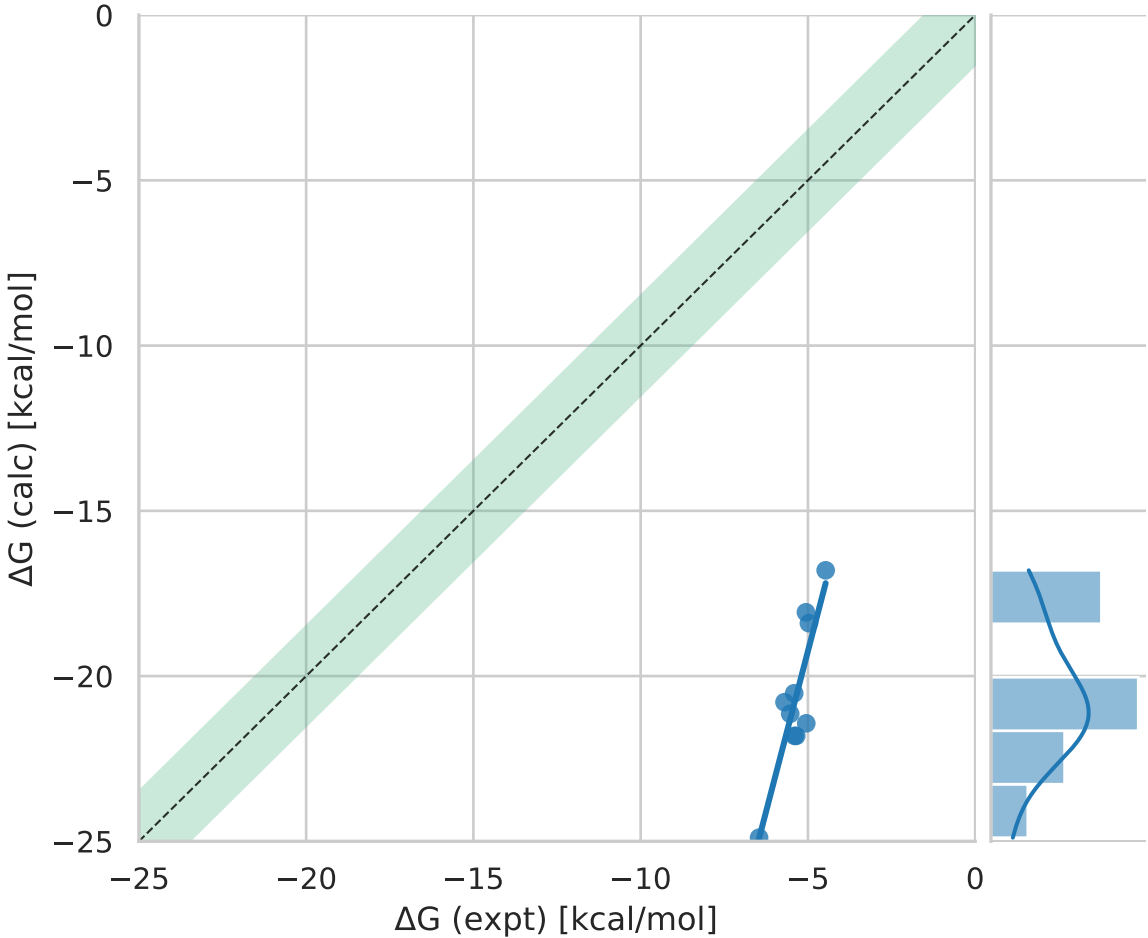

Supplement: d3cp05111k1.zip [file d3cp05111k1.zip]

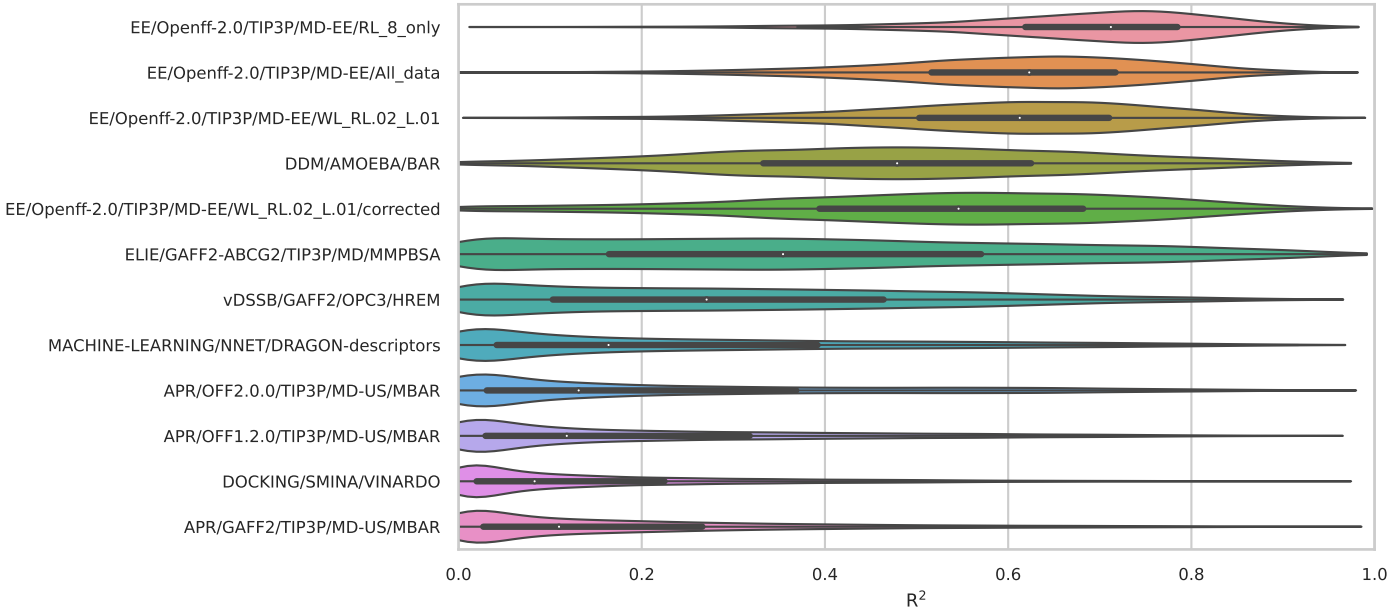

Supplement: d3cp05111k1.zip [file d3cp05111k1.zip]

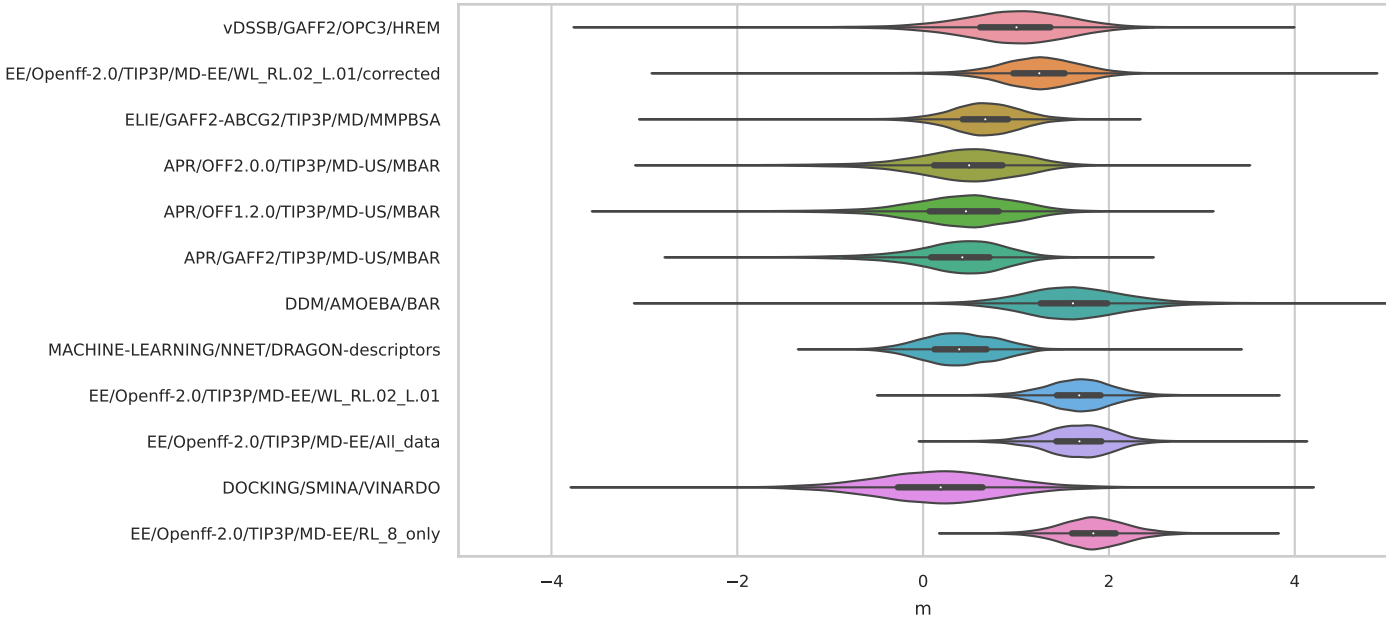

Supplement: d3cp05111k1.zip [file d3cp05111k1.zip]

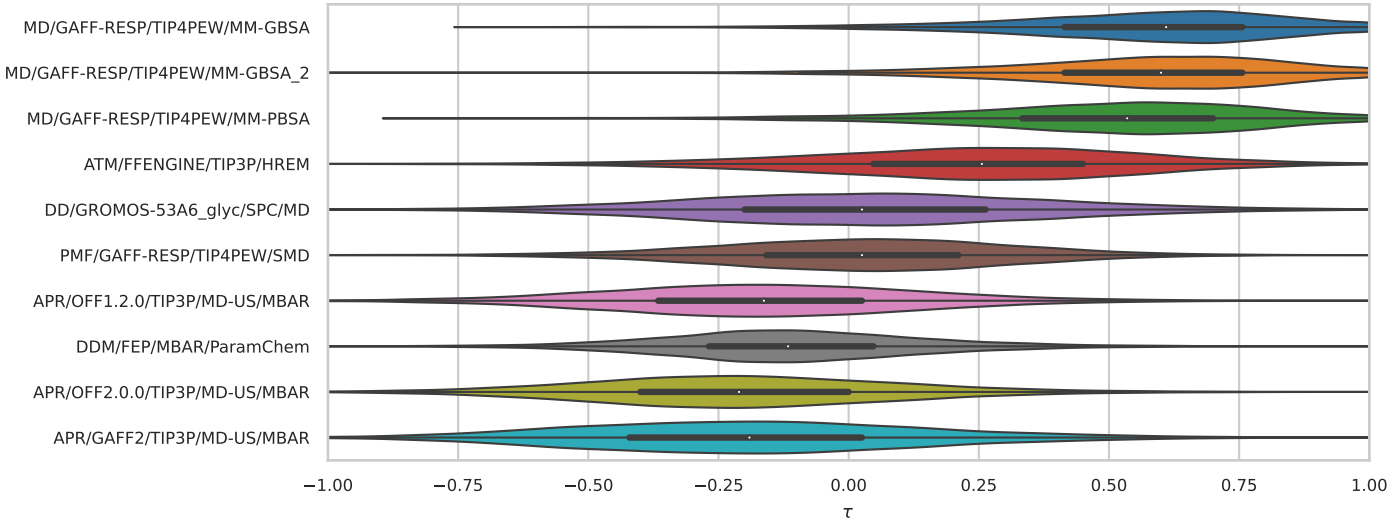

Supplement: d3cp05111k1.zip [file d3cp05111k1.zip]

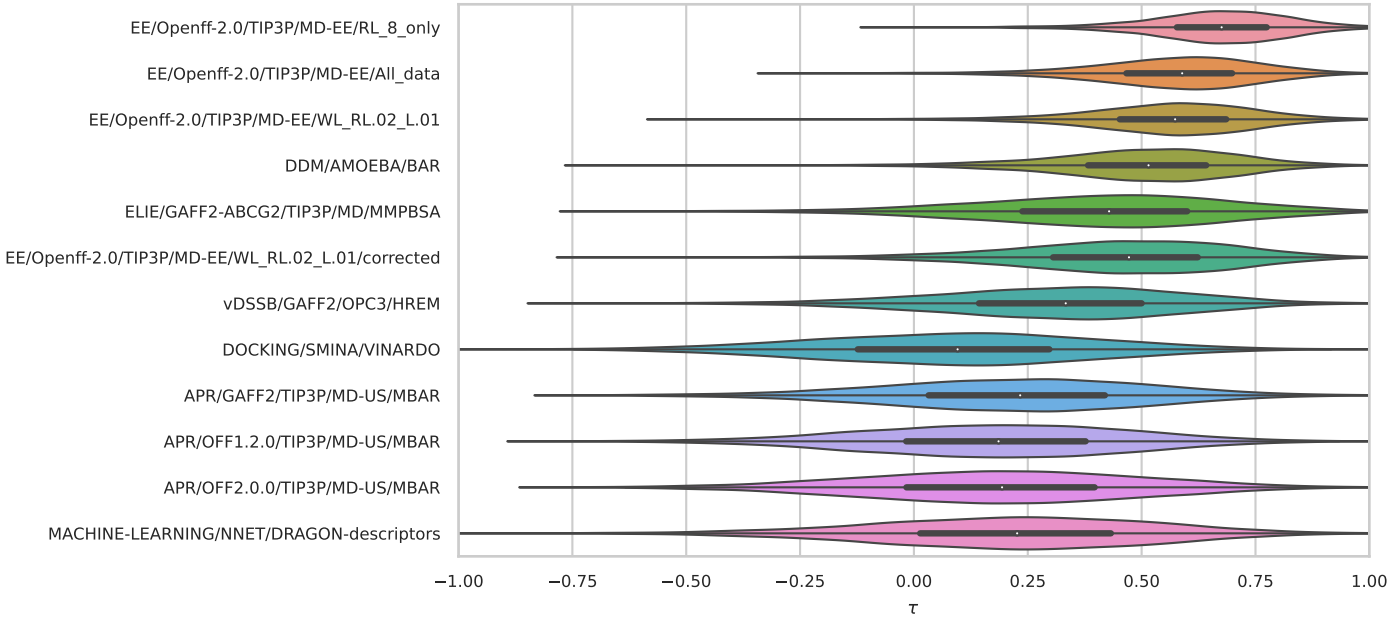

Supplement: d3cp05111k1.zip [file d3cp05111k1.zip]

MD/GAFF-RESP/TIP4PEW/MM-GBSA - CD (12)

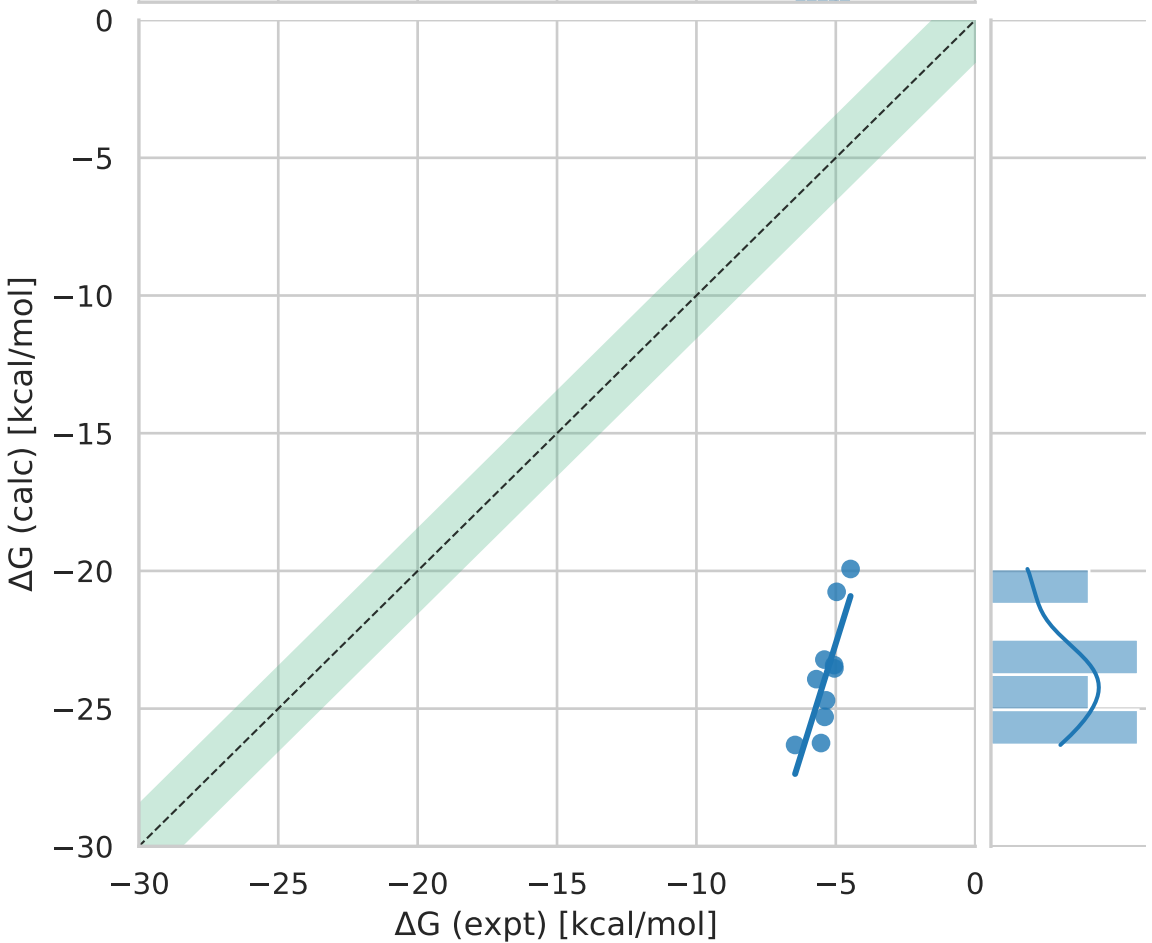

Supplement: d3cp05111k1.zip [file d3cp05111k1.zip]

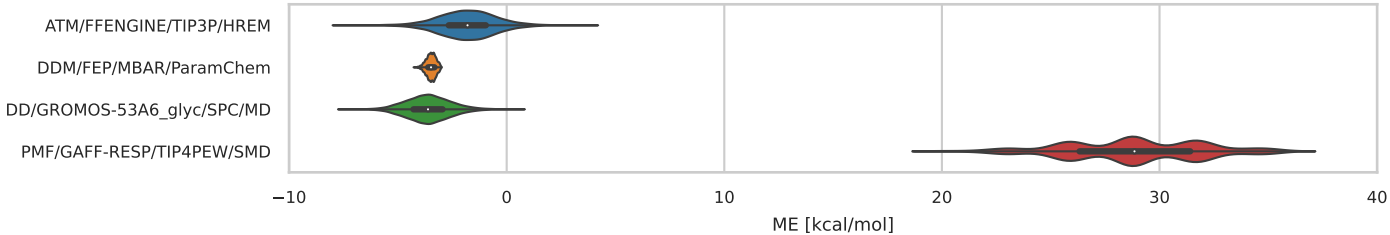

Supplement: d3cp05111k1.zip [file d3cp05111k1.zip]

# APR/OFF2.0.0/TIP3P/MD-US/MBAR - CD (23)

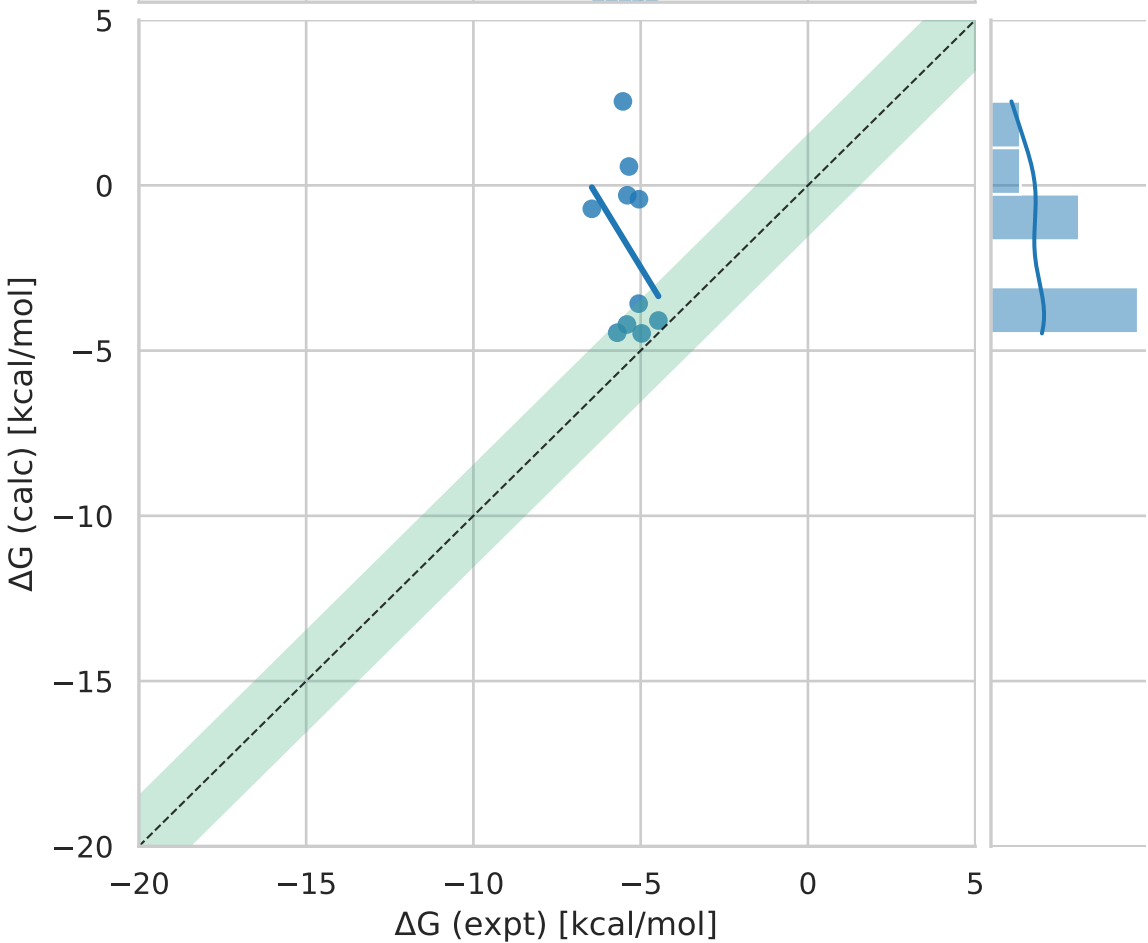

Supplement: d3cp05111k1.zip [file d3cp05111k1.zip]

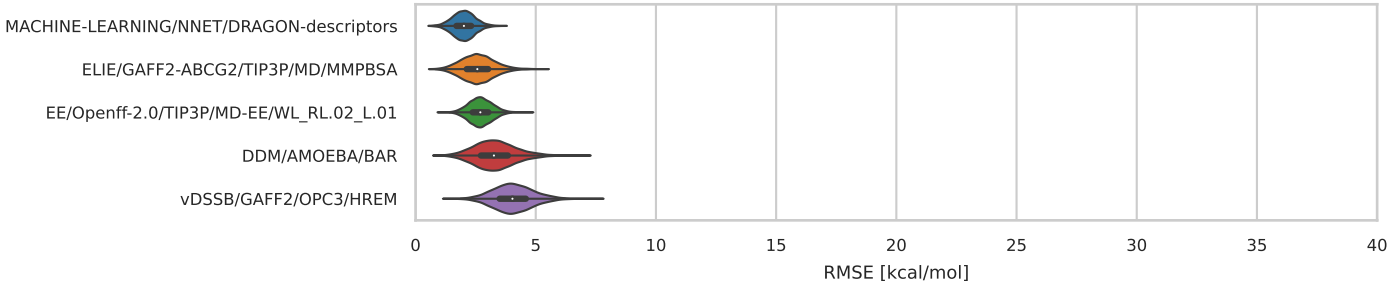

Supplement: d3cp05111k1.zip [file d3cp05111k1.zip]

## DOCKING/SMINA/VINARDO - WP6 (1)

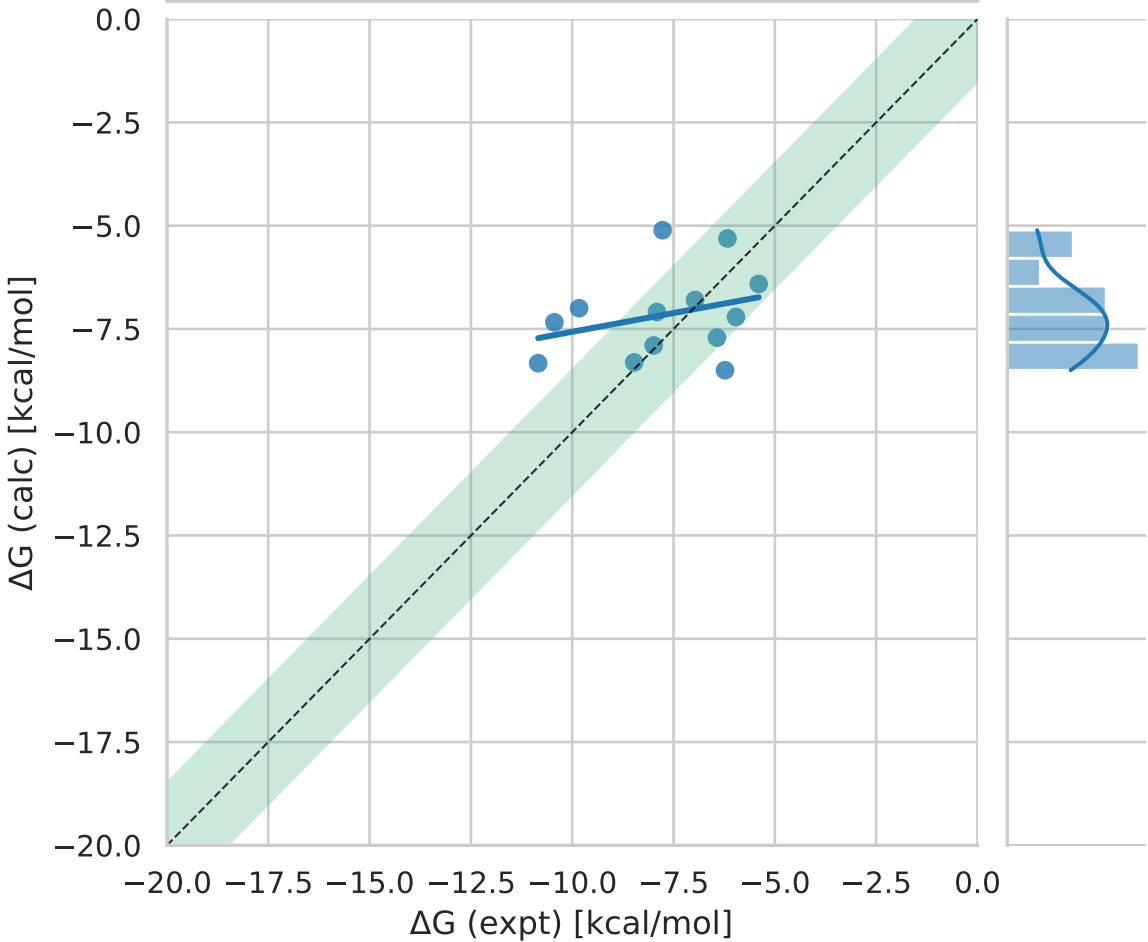

Supplement: d3cp05111k1.zip [file d3cp05111k1.zip]

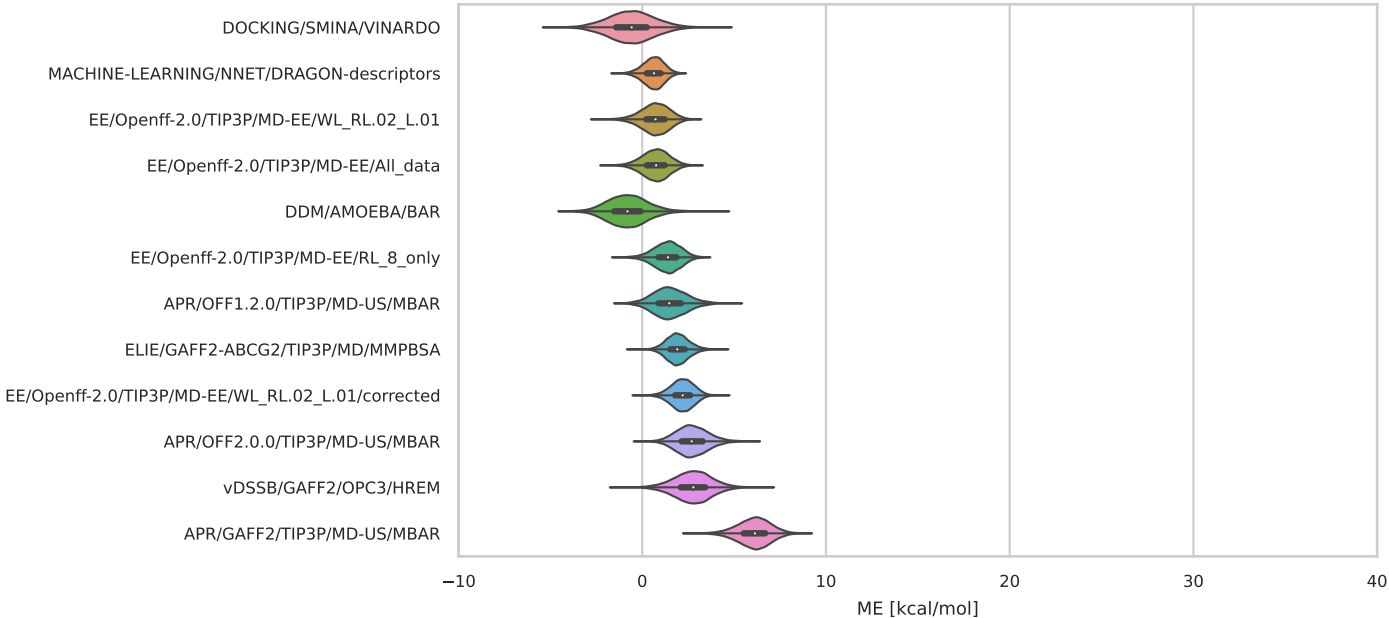

Supplement: d3cp05111k1.zip [file d3cp05111k1.zip]

ATM/FFENGINE/TIP3P/HREM - bCD (14)

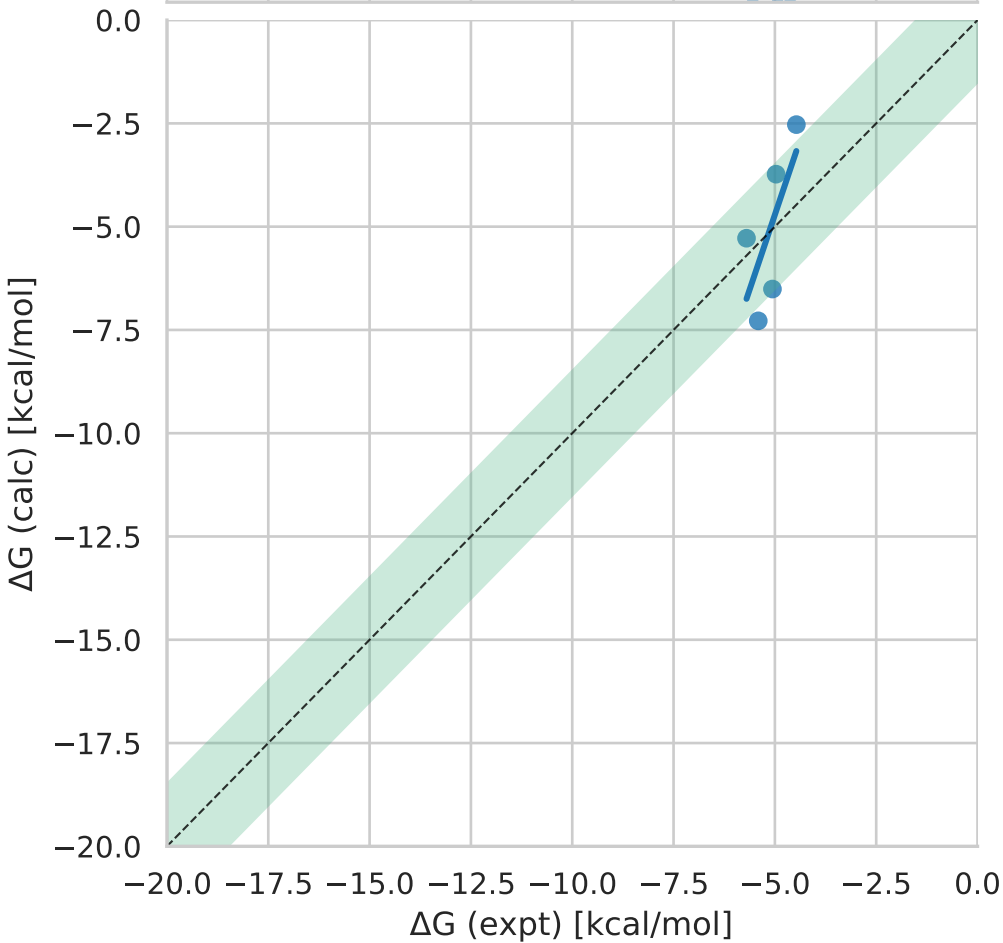

Supplement: d3cp05111k1.zip [file d3cp05111k1.zip]

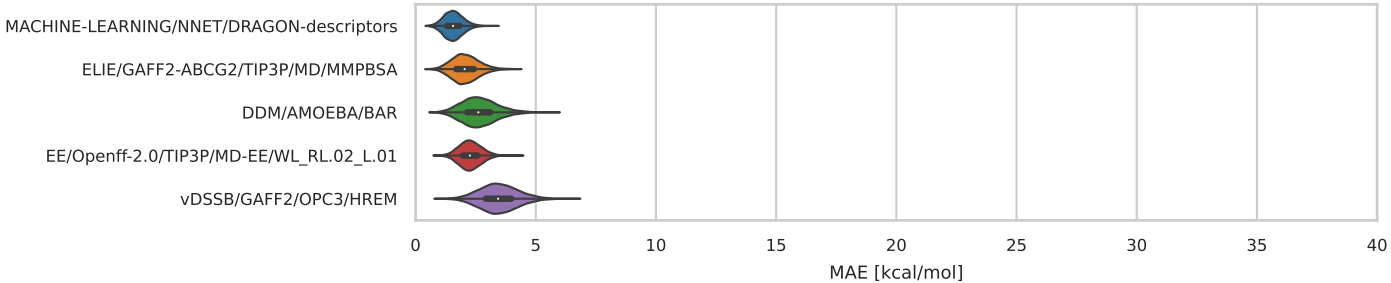

Supplement: d3cp05111k1.zip [file d3cp05111k1.zip]

DD/GROMOS-53A6\_glyc/SPC/MD - CD (11)



Supplement: d3cp05111k1.zip [file d3cp05111k1.zip]

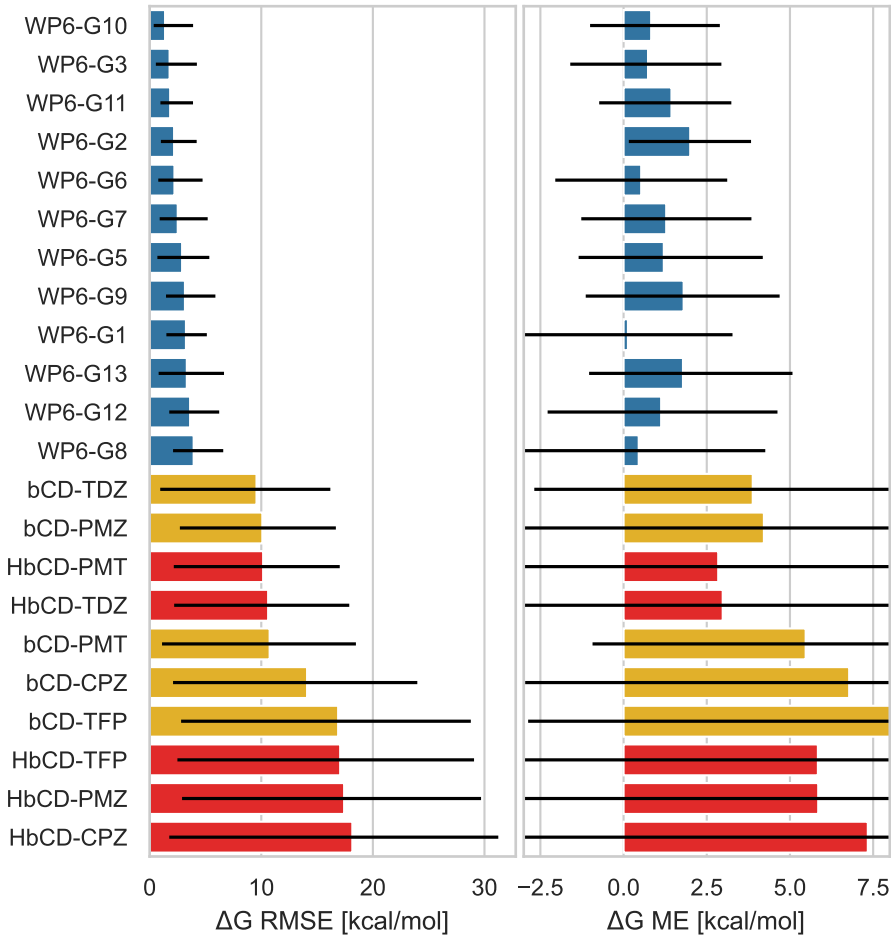

Supplement: d3cp05111k1.zip [file d3cp05111k1.zip]
